# Supplementary material
Source: publisher figshare collection journal article supplement (https://gsapubs.figshare.com/articles/dataset/_/12542294)
Supplement: Supplementary file 1 [file 1]

Ford, H.L., and Raymo, M.E., 2020, Regional and global signals in seawater  $\delta^{18}\text{O}$  records across the mid-Pleistocene transition: *Geology*, v. 48, <https://doi.org/10.1130/G46546.1>

## APPENDIX

### Site 1208

Based on sample availability, samples were taken at ~7, 10, and 20 cm intervals from 40-53, 21.7-24, and 24-40/53-87 mbsf, respectively. This equates to a temporal resolution of 1.4 to 3.7 kyr. As site 1208 is a single hole, we constructed a “re-compressed” depth, as in Venti and Billups (2012):

$$((\text{reported depth} - \text{core-top depth}) * (100 / \% \text{ core recovered}) + \text{core-top depth})$$

### Prob-stack and LR04

In the years since the publication of the  $\delta^{18}\text{O}_{\text{benthic}}$  LR04 stack (Lisiecki and Raymo, 2005) researchers have produced new  $\delta^{18}\text{O}_{\text{benthic}}$  records. An updated version of LR04 is Prob-stack (Ahn et al., 2017). Prob-stack includes 180  $\delta^{18}\text{O}_{\text{benthic}}$  globally distributed records whereas LR04 included 57  $\delta^{18}\text{O}_{\text{benthic}}$  records. Prob-stack and LR04 are similar in structure (**Data Repository Figure 1**).

### Minor Elemental Analyses

*Uvigerina* spp. was used to reconstruct bottom water temperature at Ocean Drilling Program Site 1208. Marine sediment samples were washed and picked for *Uvigerina* spp. specimens from the > 250 $\mu\text{m}$  size fraction. Prior to analysis, 6-12 *Uvigerina* spp. specimens were crushed, washed using MilliQ water and methanol, and reductively and oxidatively cleaned. Prepared samples were analyzed for minor and trace elements on the Thermo Scientific iCAP-Q inductively coupled plasma mass spectrometer (ICP-MS) at the Lamont-Doherty Earth Observatory and Rutgers University. Long-term precision of a liquid consistency standard is ~1-

2% . The pooled standard deviation of the replicate *Uvigerina* spp. Mg/Ca determinations is 0.056 mmol/mol. Al, Fe and Mn were used to screen for contamination (**Data Repository Figure 2 and 3**; n = 4 samples were eliminated because the Mn/Ca or Fe/Ca values were >350 mmol/mol or  $\mu\text{mol/mol}$ , respectively). No preservation biases are observed in percent coarse fraction or lightness as a proxy for percent  $\text{CaCO}_3$  (**Data Repository Figure 4**).

### Converting to Bottom Water Temperature and $\delta^{18}\text{O}_{\text{seawater}}$

PSU Solver (Thirumalai et al., 2016) was used to estimate bottom water temperature and  $\delta^{18}\text{O}_{\text{seawater}}$  (**Data Repository Figure 5, 6 and 7**). PSU Solver uses a Monte Carlo simulation ( $n = 1000$ ) to propagate errors on bottom water temperature and  $\delta^{18}\text{O}_{\text{sw}}$  estimates.

The following equations were used:

(1)  $\text{Mg/Ca} = 1.0 + (0.1 \cdot \text{BWT})$  from (Elderfield et al., 2010; Elderfield et al., 2012) with oxidative cleaning only

(2)  $\text{Mg/Ca} = 0.9 + (0.1 \cdot \text{BWT})$  modified from (Elderfield et al., 2010; Elderfield et al., 2012) with oxidative and reductive cleaning (Woodard et al., 2014; Ford et al., 2016)

(3)  $\text{Mg/Ca} = 1.16 + (0.15 \cdot T)$  from (Sosdian and Rosenthal, 2009)

(4)  $\text{Temperature} = 16.9 - 4.0 \cdot (\delta^{18}\text{O}_{\text{carbonate}} - \delta^{18}\text{O}_{\text{sw}} + 0.27)$  from (Shackleton, 1974; Kim and O'Neil, 1997; Elderfield et al., 2010; Elderfield et al., 2012)

Bottom water temperature for *Uvigerina* spp. was estimated using equation 1 and equation 2 for ODP Site 1123 and Site 1208, respectively. For the multi-species bottom water temperature reconstruction at DSDP Site 607, equation 2 was used for *Uvigerina* spp. and

equation 3 was used *Cibicidoides wuellerstorfi* and *Oridorsalis umbonatus*. The Mg/Ca uncertainty for *Uvigerina* spp. is 0.06 mmol/mol and 0.16 mmol/mol for *Cibicidoides wuellerstorfi* and *Oridorsalis umbonatus*. The  $\delta^{18}\text{O}_{\text{carbonate}}$  uncertainty is 0.06 per mill. The age model uncertainty is 1 kyrs.

## Constructing the $\delta^{18}\text{O}_{\text{seawater}}$ Stack

Using the  $\delta^{18}\text{O}_{\text{sw}}$  estimates from ODP Sites 1123 and 1208 and DSDP Site 607 from PSU Solver (**Data Repository Figure 8**), we created a  $\delta^{18}\text{O}_{\text{sw}}$  stack. First, the  $\delta^{18}\text{O}_{\text{sw}}$  estimates for each site were interpolated the records to an even 3-kyr interval (across the 338-1450 ka interval where all three records  $\leq 3$  kyr resolution, **Data Repository Figure 9**). During the 338 – 1450 ka interval Sites 607, 1123, and 1208 have a  $\sim 3.0$  kyr, 2.7 kyr, and 1.0 kyr sampling resolution, respectively. Each record was then bootstrapped to estimate error ( $n = 1000$ , **Data Repository Figure 10**). The interpolated means the bootstrapped error estimates were then averaged to create the mean and error estimate of the  $\delta^{18}\text{O}_{\text{sw}}$  stack (**Data Repository Figure 11**).

## Wavelet analyses of the individual $\delta^{18}\text{O}_{\text{sw}}$ and $\delta^{18}\text{O}_{\text{sw}}$ stack

Continuous 1-D wavelet transforms were calculated using the Matlab® function cwt (Data Repository Figure 12). The Probstack has strong 41- and 100-kyr signal. The d18Osw records have weak 41-kyr signal and 100-kyr signal that begins  $\sim 900$  kyr and becomes stronger at  $\sim 600$  kyr.

## Data Set

2020037\_Data Set.xlsx

69 **Data Repository Figure 1:** Prob-stack (top) and LR04 (bottom). Error envelopes: dark grey =  
70  $1\sigma$ , light grey =  $2\sigma$ ).

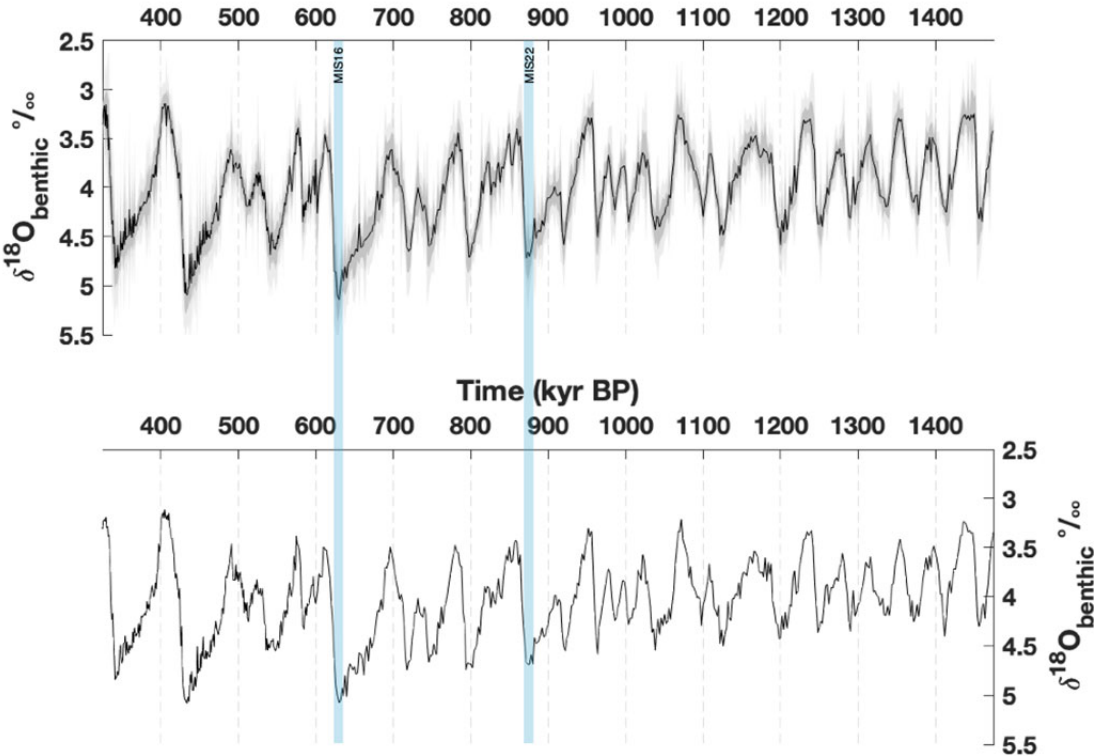

72 **Data Repository Figure 2:** Scatter plots of Mg, Al, Fe and Mn.

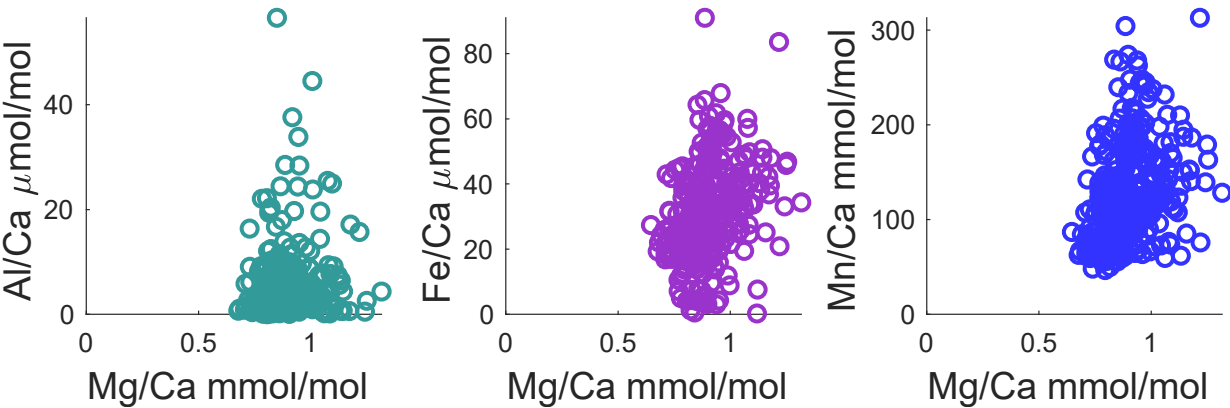

73

74

75

76 **Data Repository Figure 3: Time series plots of Mg (black), Al, Fe and Mn.**

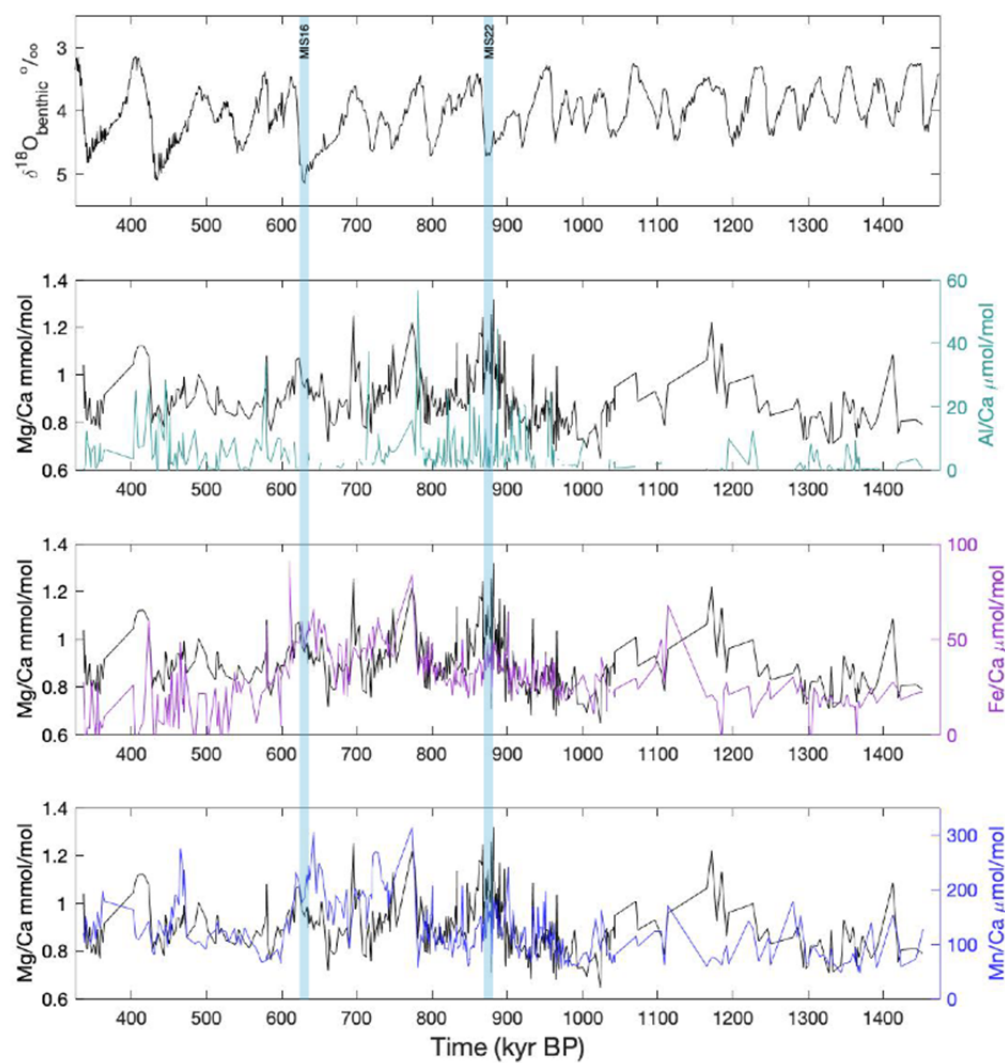

77

78

79 **Data Repository Figure 4:** Time series plots of Site 1208  $\delta^{18}\text{O}_{\text{benthic}}$  (black) and Coarse Fraction  
80 (%) and  $\text{CaCO}_3$  (%) showing no obvious preservation bias in the Site 1208 Mg/Ca record.

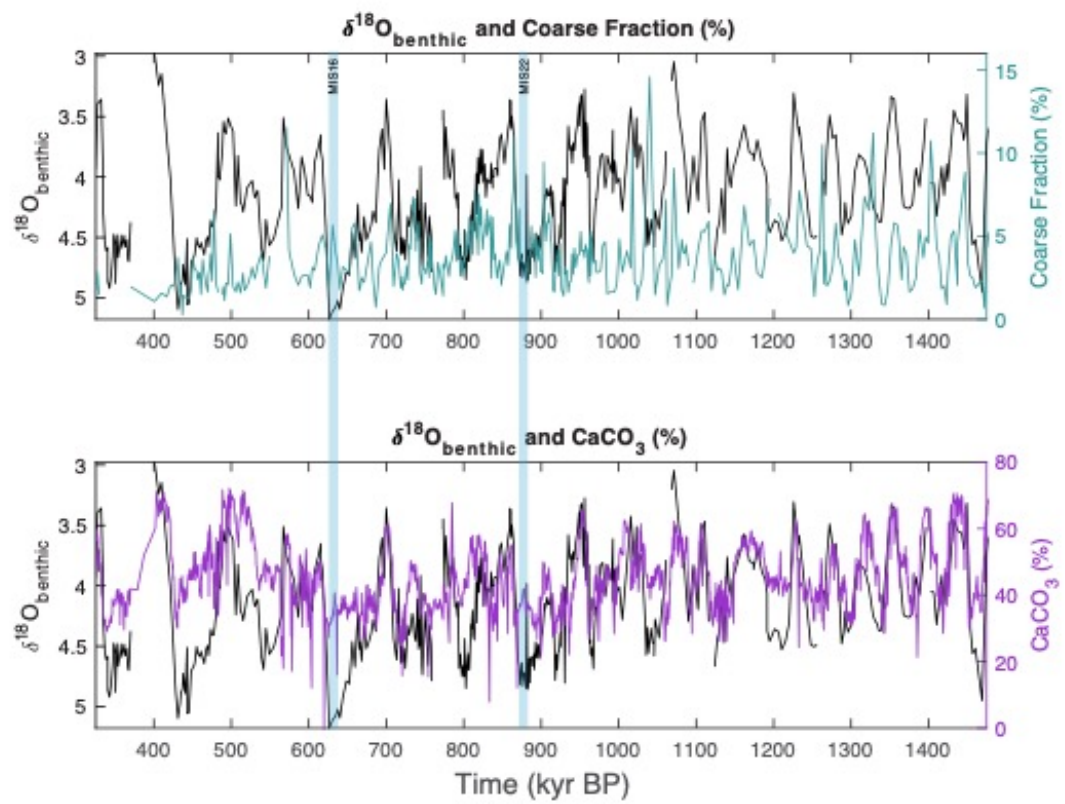

**Data Repository Figure 5:** N. Pacific ODP Site 1208  $\delta^{18}\text{O}_{\text{benthic}}$ , Mg/Ca derived temperature and  $\delta^{18}\text{O}_{\text{seawater}}$ . Using Monte Carlo simulations, PSU Solver (Thirumalai et al., 2016) generated error envelopes (dark grey =  $1\sigma$ , light grey =  $2\sigma$ ) on temperature and  $\delta^{18}\text{O}_{\text{seawater}}$ .

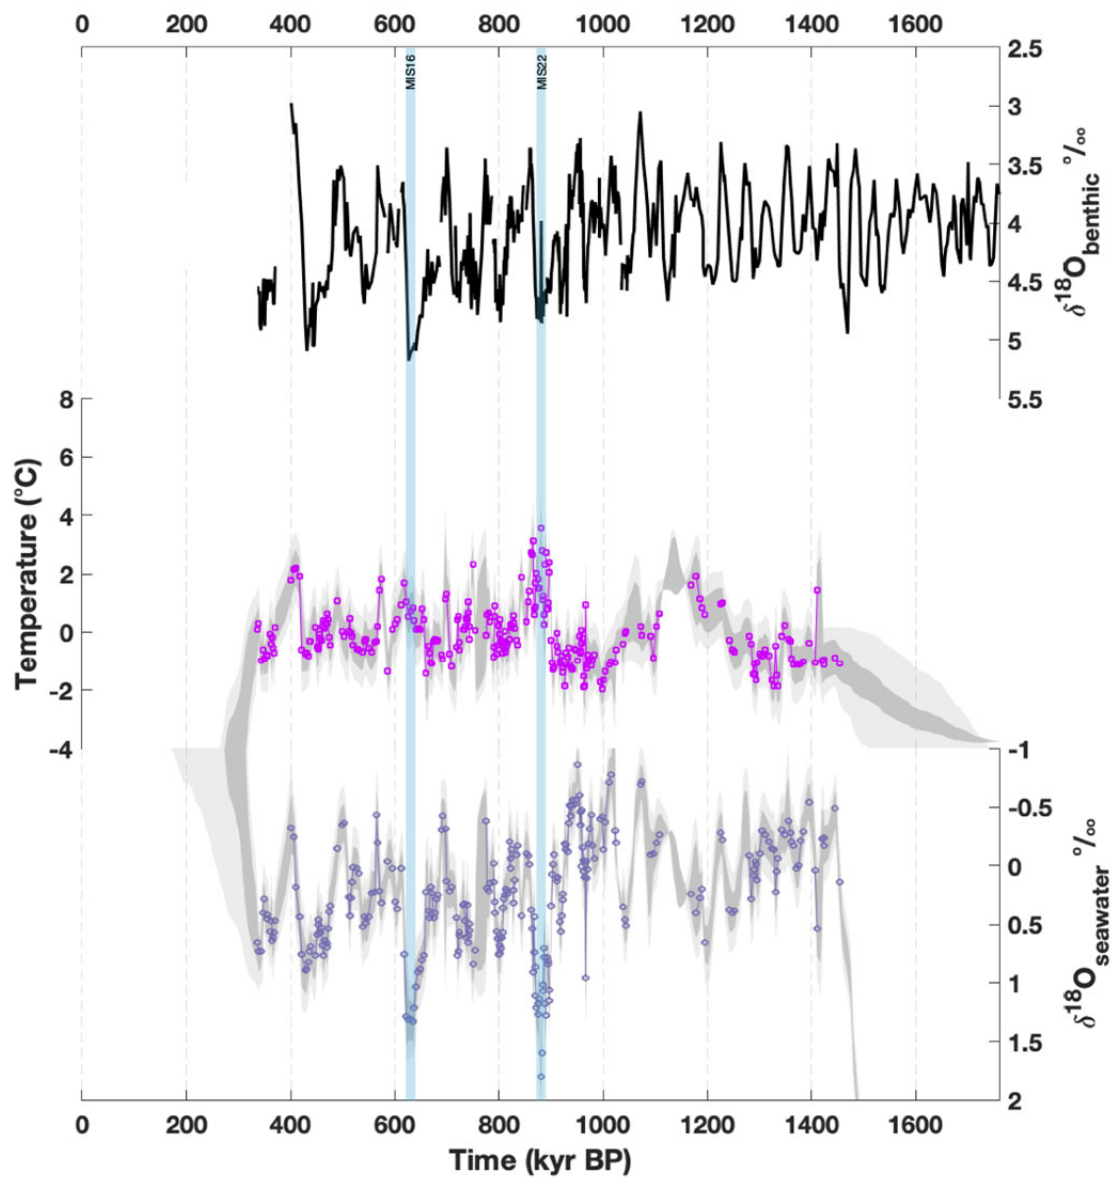



89 **Data Repository Figure 6:** S. Pacific ODP Site 1123  $\delta^{18}\text{O}_{\text{benthic}}$ , Mg/Ca derived temperature and  
90  $\delta^{18}\text{O}_{\text{seawater}}$ . Using Monte Carlo simulations, PSU Solver (Thirumalai et al., 2016) generated error  
91 envelopes (dark grey =  $1\sigma$ , light grey =  $2\sigma$ ) on temperature and  $\delta^{18}\text{O}_{\text{seawater}}$ .

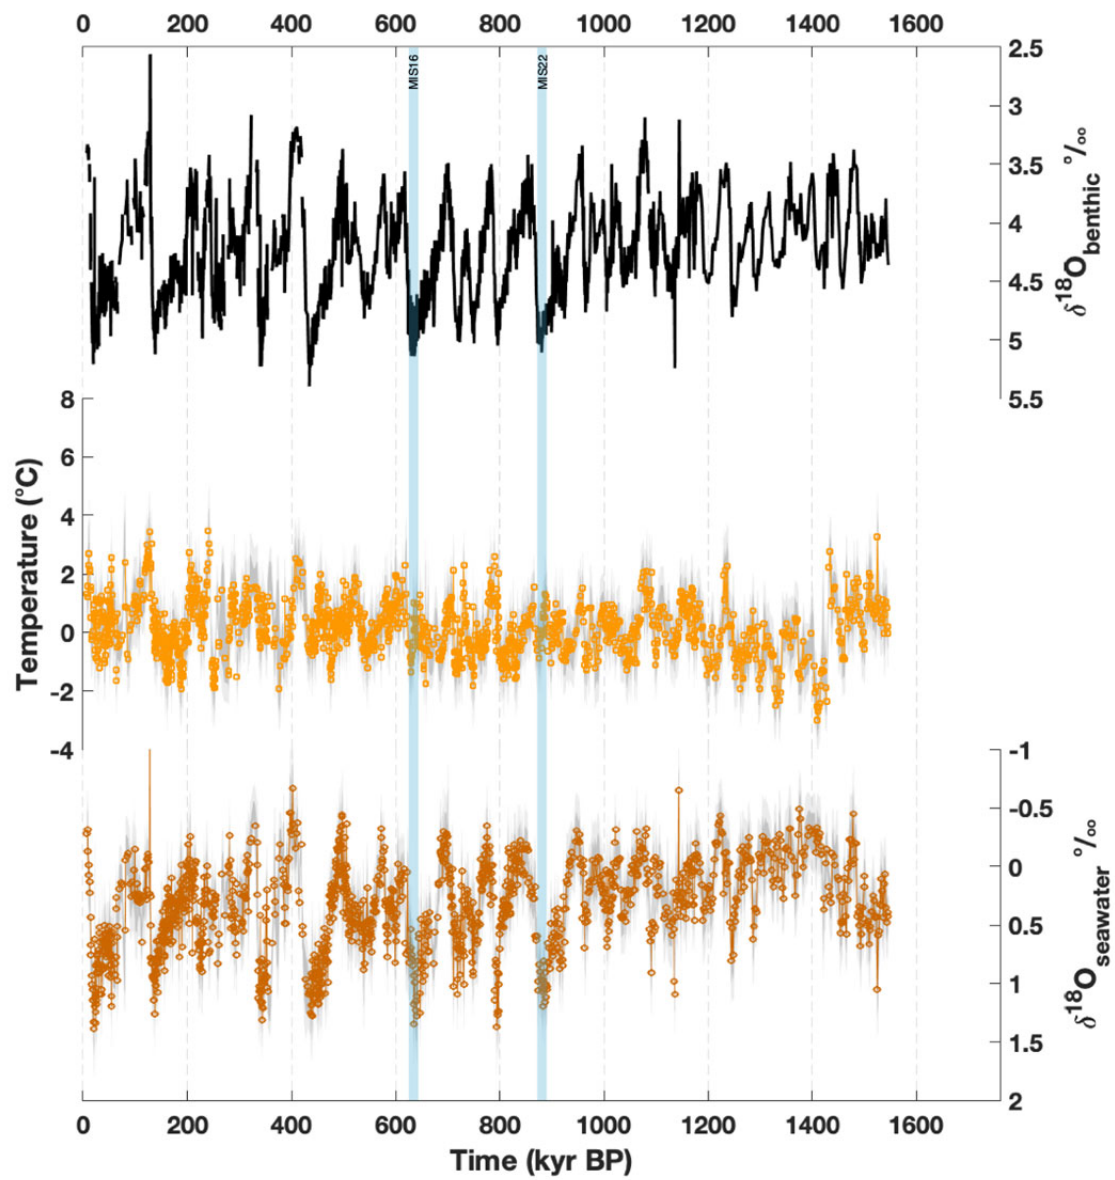

92

93

94

**Data Repository Figure 7: N. Atlantic DSDP Site 607  $\delta^{18}\text{O}_{\text{benthic}}$ , Mg/Ca derived temperature and  $\delta^{18}\text{O}_{\text{seawater}}$ .** Using Monte Carlo simulations, PSU Solver (Thirumalai et al., 2016) generated error envelopes (dark grey =  $1\sigma$ , light grey =  $2\sigma$ ) on temperature and  $\delta^{18}\text{O}_{\text{seawater}}$ .

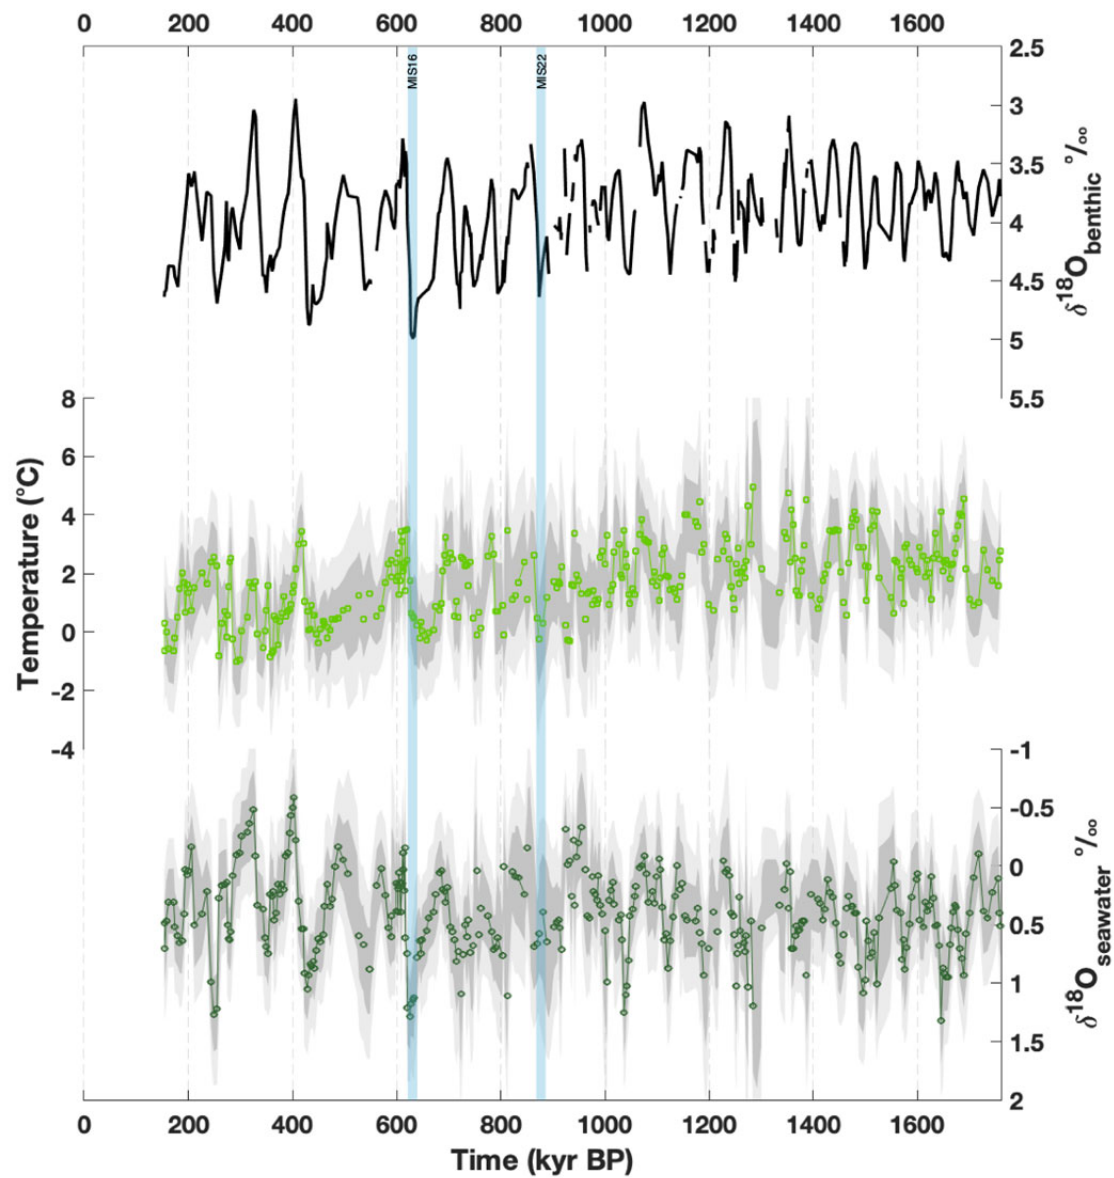

100 **Data Repository Figure 8:** Prob-stack and  $\delta^{18}\text{O}_{\text{seawater}}$  records from ODP 1208 and 1123 and  
101 DSDP 607. Error envelopes: dark grey =  $1\sigma$ , light grey =  $2\sigma$ ).

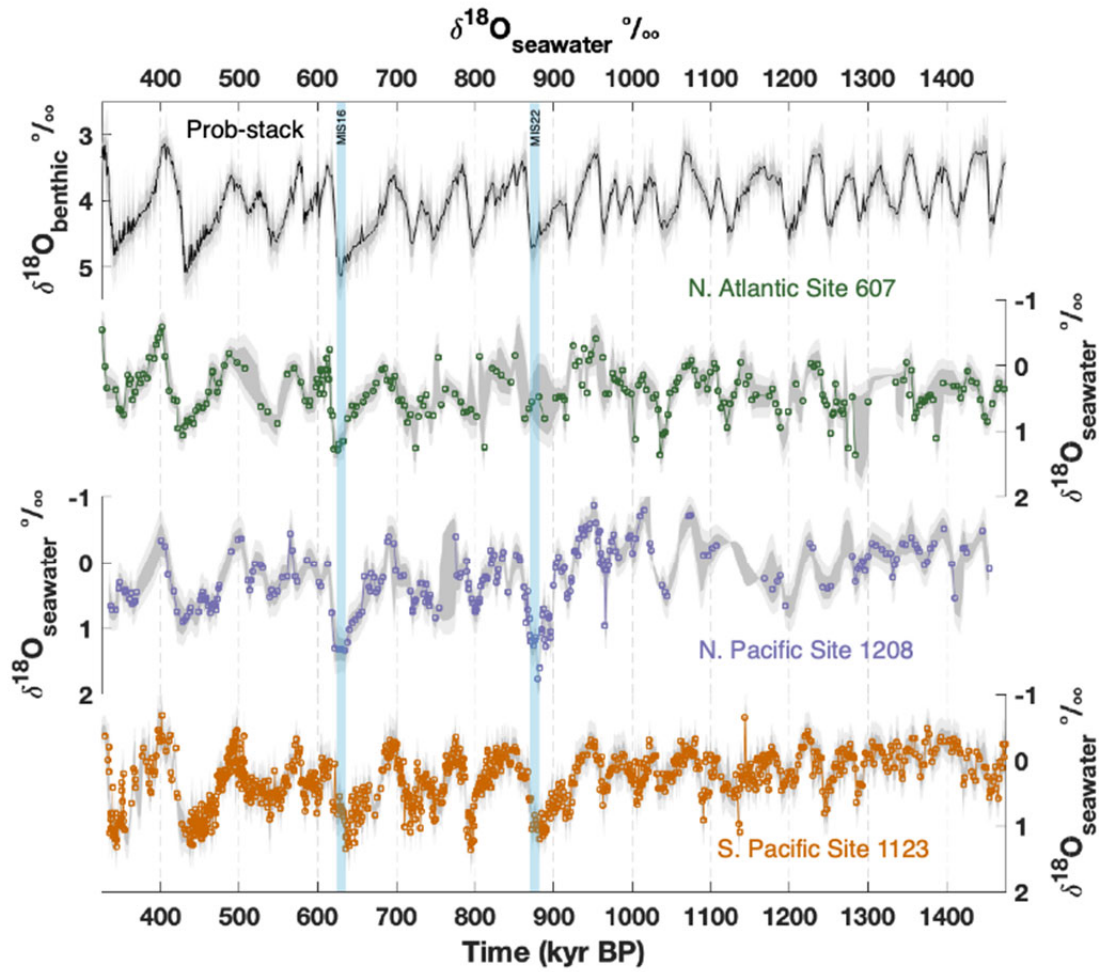

104 **Data Repository Figure 9:** Prob-stack and interpolated  $\delta^{18}\text{O}_{\text{seawater}}$  records from ODP 1208 and  
105 1123 and DSDP 607. Error envelopes: dark grey =  $1\sigma$ , light grey =  $2\sigma$ ).

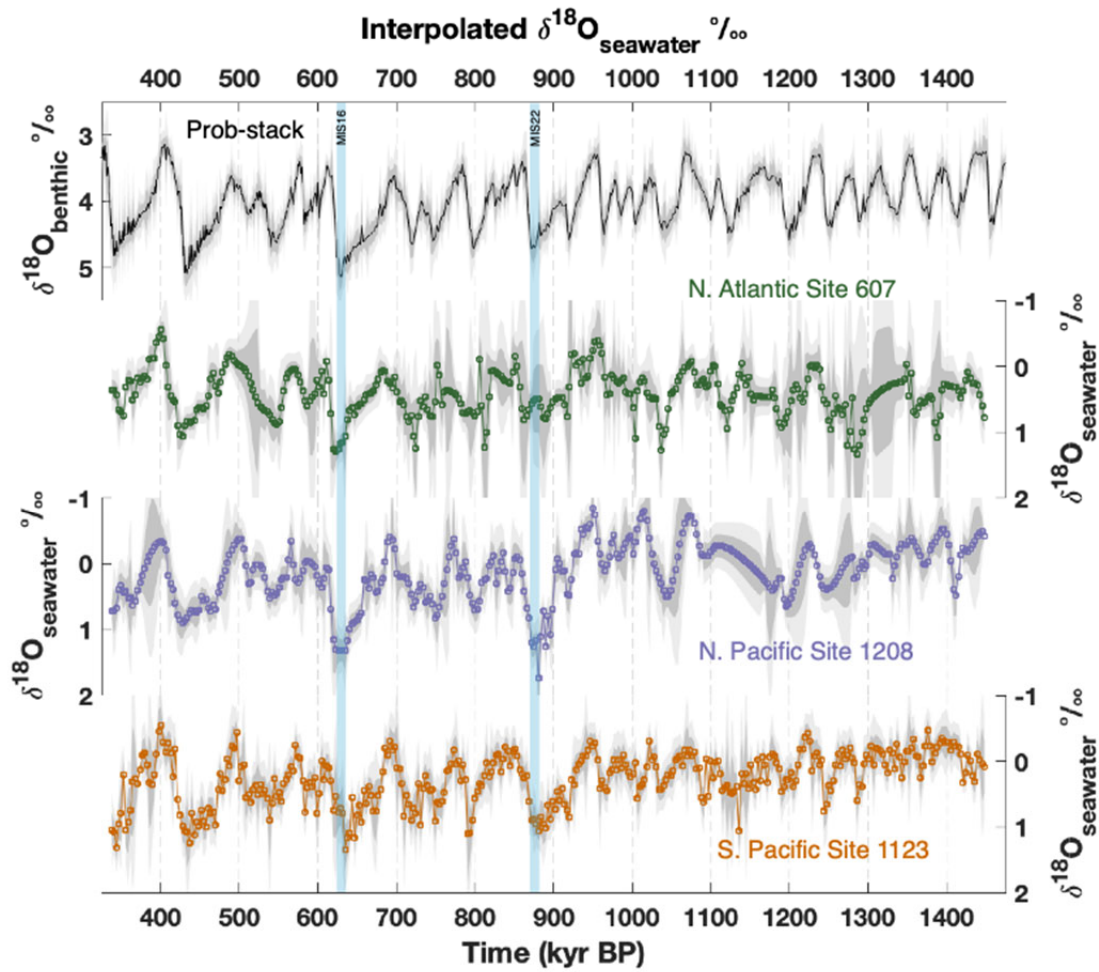

108 **Data Repository Figure 10:** Prob-stack and bootstrapped  $\delta^{18}\text{O}_{\text{seawater}}$  records from ODP 1208  
109 and 1123 and DSDP 607. Error envelopes: dark grey =  $1\sigma$ , light grey =  $2\sigma$ ).

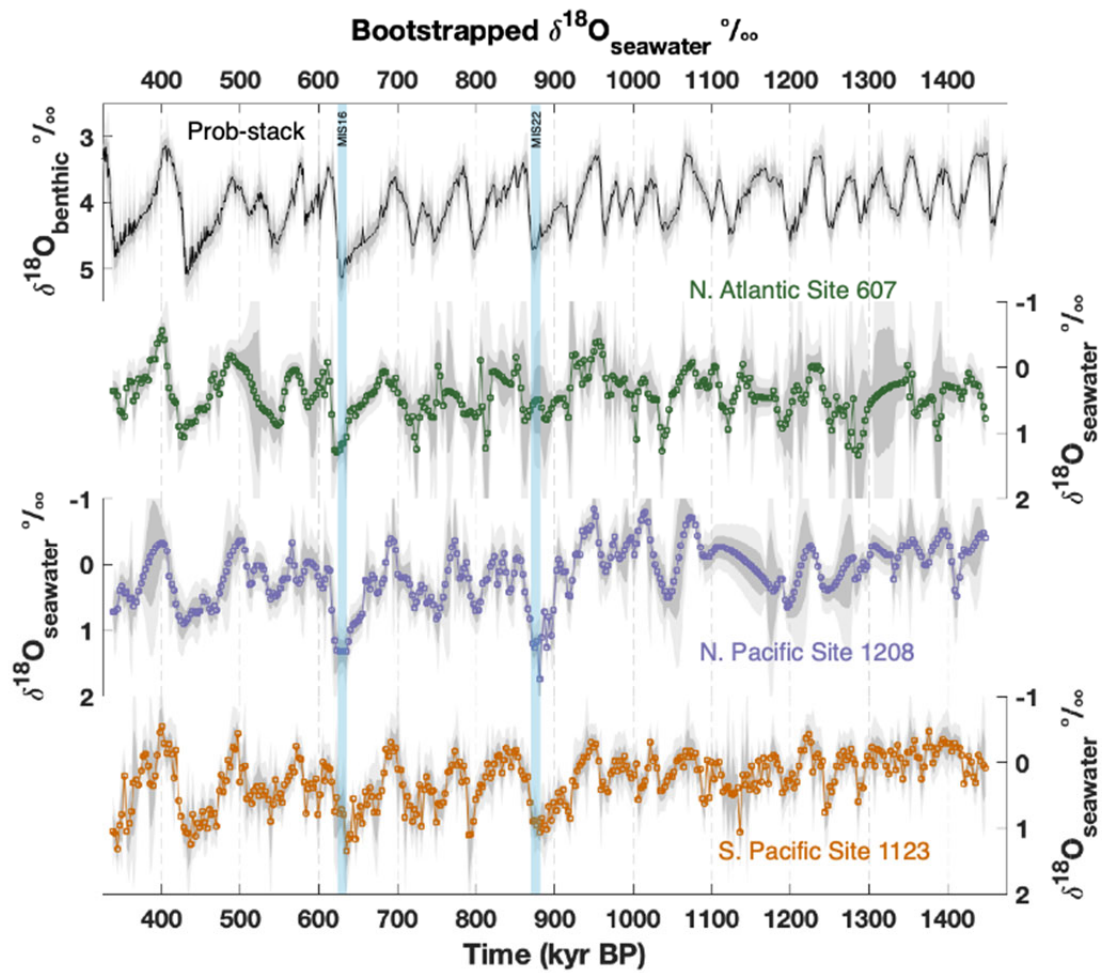



112 **Data Repository Figure 11:** Prob-stack and  $\delta^{18}\text{O}_{\text{sw}}$  stack. Error envelopes: dark grey =  $1\sigma$ , light  
113 grey =  $2\sigma$ ).

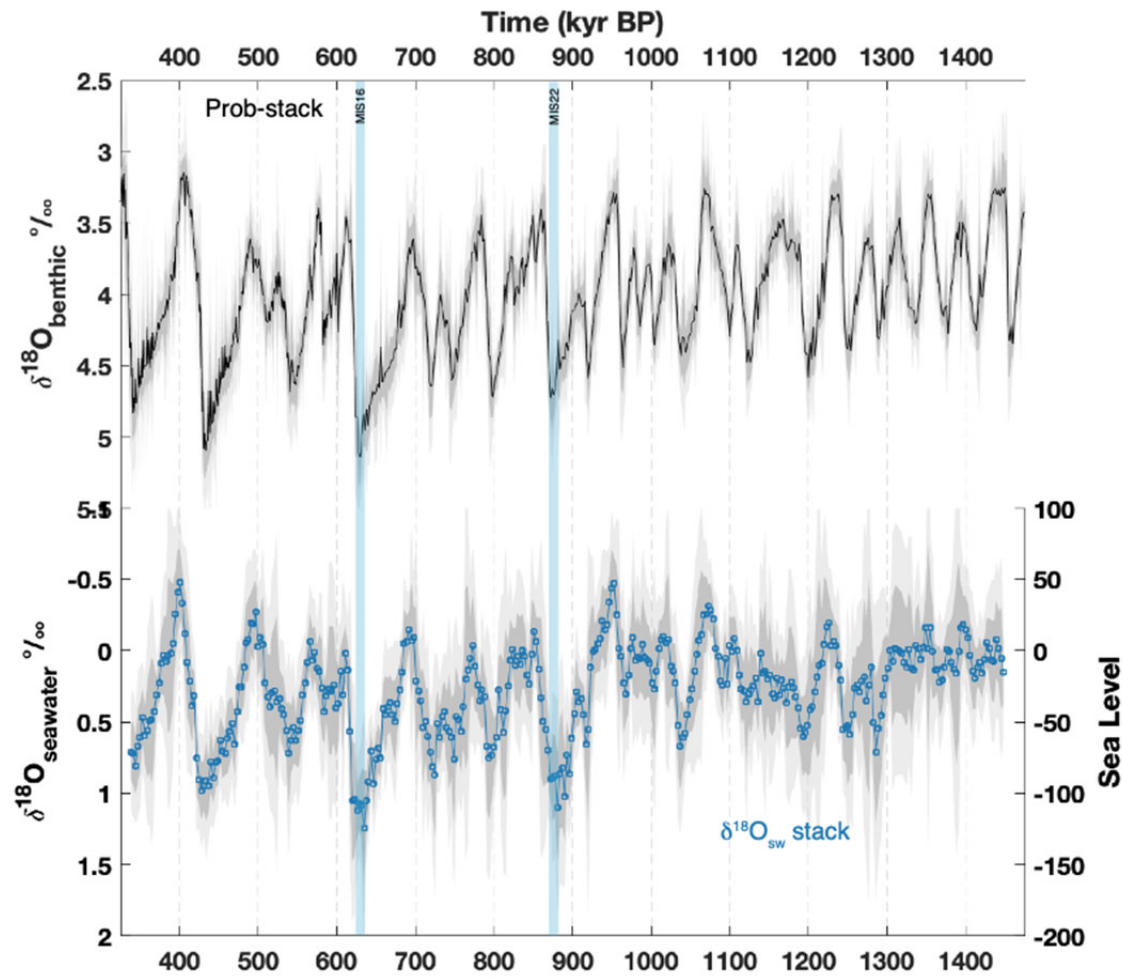

117 **Data Repository Figure 12:** Wavelet analyses of Prob Stack,  $\delta^{18}\text{O}_{\text{sw}}$  stack, and  $\delta^{18}\text{O}_{\text{sw}}$  records  
 118 from Sites 607, 1123 and 1208.

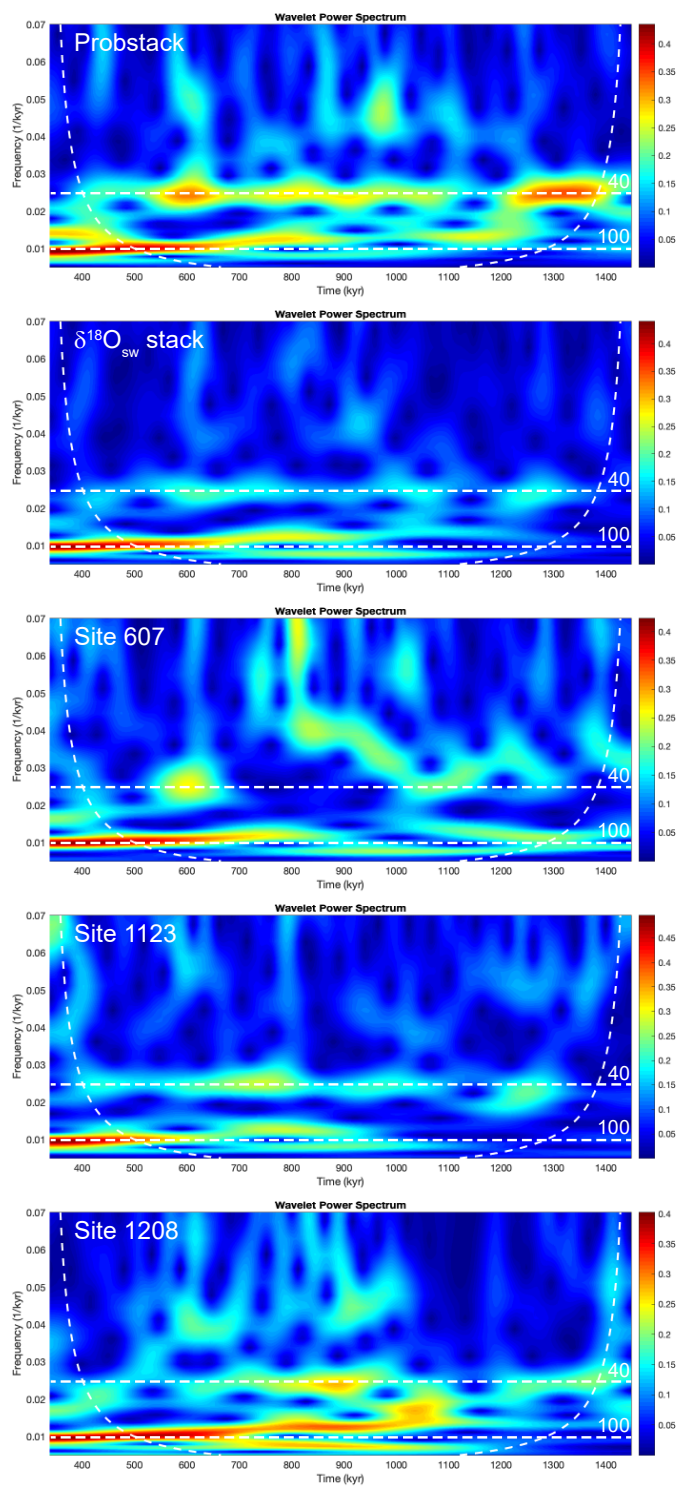

- 120 Ahn, S., Khider, D., Lisiecki, L.E., and Lawrence, C.E., 2017, A probabilistic Pliocene–  
121 Pleistocene stack of benthic  $\delta^{18}\text{O}$  using a profile hidden Markov model: Dynamics and  
122 Statistics of the Climate System, v. 2, no. 1, p. 91–16, doi: 10.1093/climsys/dzx002.
- 123 Elderfield, H., Ferretti, P., Greaves, M., Crowhurst, S., McCave, I.N., Hodell, D., and  
124 Piotrowski, A.M., 2012, Evolution of Ocean Temperature and Ice Volume Through the Mid-  
125 Pleistocene Climate Transition: Science, v. 337, no. 6095, p. 704–709, doi:  
126 10.1126/science.1221294.
- 127 Elderfield, H., Greaves, M., Barker, S., Hall, I.R., Tripathi, A., Ferretti, P., Crowhurst, S., Booth,  
128 L., and Daunt, C., 2010, A record of bottom water temperature and seawater  $\delta^{18}\text{O}$  for the  
129 Southern Ocean over the past 440kyr based on Mg/Ca of benthic foraminiferal *Uvigerina*  
130 spp.: Quaternary Science Reviews, v. 29, no. 1, p. 160–169.
- 131 Ford, H.L., Soshian, S.M., Rosenthal, Y., and Raymo, M.E., 2016, Gradual and abrupt changes  
132 during the Mid-Pleistocene Transition: Quaternary Science Reviews, v. 148, no. C, p. 222–  
133 233, doi: 10.1016/j.quascirev.2016.07.005.
- 134 Kim, S., and O'Neil, J., 1997, Equilibrium and nonequilibrium oxygen isotope effects in  
135 synthetic carbonates: Geochimica et Cosmochimica Acta, v. 61, p. 3461–3475.
- 136 Lisiecki, L.E., and Raymo, M.E., 2005, A Pliocene-Pleistocene stack of 57 globally distributed  
137 benthic  $\delta^{18}\text{O}$  records: Paleoceanography, v. 20, no. 1, p. PA1003, doi:  
138 10.1029/2004PA001071.
- 139 Shackleton, N.J., 1974, Attainment of isotopic equilibrium between ocean water and the  
140 benthonic foraminifera genus *Uvigerina*: Isotopic changes in the ocean during the last  
141 glacial: Colloques Internationaux du C.N.R.S., p. 203–209.
- 142 Soshian, S., and Rosenthal, Y., 2009, Deep-Sea Temperature and Ice Volume Changes Across  
143 the Pliocene-Pleistocene Climate Transitions: Science, v. 325, no. 5938, p. 306–310, doi:  
144 10.1126/science.1169938.
- 145 Thirumalai, K., Quinn, T.M., and Marino, G., 2016, Constraining past seawater  $\delta^{18}\text{O}$  and  
146 temperature records developed from foraminiferal geochemistry: Paleoceanography, doi:  
147 10.1002/(ISSN)1944-9186.
- 148 Venti, N.L., and Billups, K., 2012, Stable-isotope stratigraphy of the Pliocene–Pleistocene  
149 climate transition in the northwestern subtropical Pacific: *Palaeogeography*,  
150 *Palaeoclimatology*, *Palaeoecology*, v. 326 p. 54–65.
- 151 Woodard, S.C., Rosenthal, Y., Miller, K.G., Wright, J.D., Chiu, B.K., and Lawrence, K.T., 2014,  
152 Antarctic role in Northern Hemisphere glaciation: Science, v. 346, no. 6211, p. 847–851,  
153 doi: 10.1126/science.1255586.
