# Supplementary material
Source: publisher figshare collection journal article supplement (https://gsapubs.figshare.com/articles/dataset/_/12542294)
Supplement: Supplementary file 1 [file 1]

## Sheet: Depths
Site	Core	T	Sc	Top(cm)	Bot(cm)	Shipboard Reported Depth(mbsf)	core top (mbsf)	core recov %	unique ("recompressed") depth (m)	Age HMM Stack
1208A	3	H	6	4	6	21.74	14.2	101.8	21.6067	334.229
1208A	3	H	6	14	16	21.84	14.2	101.8	21.7049	336.53
1208A	3	H	6	24	26	21.94	14.2	101.8	21.8031	338.413
1208A	3	H	6	34	36	22.04	14.2	101.8	21.9014	340.505
1208A	3	H	6	43	45	22.13	14.2	101.8	21.9898	342.806
1208A	3	H	6	54	56	22.24	14.2	101.8	22.0978	345.107
1208A	3	H	6	64	66	22.34	14.2	101.8	22.1961	346.989
1208A	3	H	6	74	75	22.43	14.2	101.8	22.2845	348.244
1208A	3	H	6	84	86	22.54	14.2	101.8	22.3925	350.546
1208A	3	H	6	94	96	22.64	14.2	101.8	22.4908	352.219
1208A	3	H	6	104	106	22.74	14.2	101.8	22.589	353.893
1208A	3	H	6	114	116	22.84	14.2	101.8	22.6872	355.775
1208A	3	H	6	124	126	22.94	14.2	101.8	22.7855	357.449
1208A	3	H	6	134	136	23.04	14.2	101.8	22.8837	358.913
1208A	3	H	6	143	145	23.13	14.2	101.8	22.9721	360.377
1208A	3	H	7	4	6	23.24	14.2	101.8	23.0802	362.051
1208A	3	H	7	14	16	23.34	14.2	101.8	23.1784	363.306
1208A	3	H	7	24	26	23.44	14.2	101.8	23.2766	364.979
1208A	3	H	7	33	35	23.53	14.2	101.8	23.365	366.653
1208A	3	H	7	42	44	23.62	14.2	101.8	23.4534	367.699
1208A	3	H	cc	8	10	23.72	14.2	101.8	23.5517	368.954
1208A	3	H	cc	16	18	23.8	14.2	101.8	23.6303	370
1208A	4	H	1	0	2	23.7	23.7	103.4	23.7	400.763
1208A	4	H	1	10	12	23.8	23.7	103.4	23.7967	406.359
1208A	4	H	1	20	22	23.9	23.7	103.4	23.8934	409.921
1208A	4	H	1	40	42	24.1	23.7	103.4	24.0868	416.789
1208A	4	H	1	60	62	24.3	23.7	103.4	24.2803	421.367
1208A	4	H	1	80	82	24.5	23.7	103.4	24.4737	424.801
1208A	4	H	1	100	102	24.7	23.7	103.4	24.6671	428.235
1208A	4	H	1	120	122	24.9	23.7	103.4	24.8605	431.033
1208A	4	H	1	140	142	25.1	23.7	103.4	25.054	433.831
1208A	4	H	2	0	2	25.2	23.7	103.4	25.1507	435.103
1208A	4	H	2	10	12	25.3	23.7	103.4	25.2474	436.884
1208A	4	H	2	20	22	25.4	23.7	103.4	25.3441	437.901
1208A	4	H	2	40	42	25.6	23.7	103.4	25.5375	440.7
1208A	4	H	2	60	62	25.8	23.7	103.4	25.7309	442.989
1208A	4	H	2	80	82	26	23.7	103.4	25.9244	445.533
1208A	4	H	2	100	102	26.2	23.7	103.4	26.1178	448.076
1208A	4	H	2	120	122	26.4	23.7	103.4	26.3112	450.62
1208A	4	H	2	140	142	26.6	23.7	103.4	26.5046	452.401
1208A	4	H	3	0	2	26.7	23.7	103.4	26.6014	453.927
1208A	4	H	3	10	12	26.8	23.7	103.4	26.6981	455.199
1208A	4	H	3	20	22	26.9	23.7	103.4	26.7948	456.725
1208A	4	H	3	40	42	27.1	23.7	103.4	26.9882	459.014
1208A	4	H	3	60	62	27.3	23.7	103.4	27.1816	460.795
1208A	4	H	3	80	82	27.5	23.7	103.4	27.375	463.084
1208A	4	H	3	100	102	27.7	23.7	103.4	27.5685	465.119
1208A	4	H	3	120	122	27.9	23.7	103.4	27.7619	467.154
1208A	4	H	3	140	142	28.1	23.7	103.4	27.9553	469.444
1208A	4	H	4	0	2	28.2	23.7	103.4	28.052	470.715
1208A	4	H	4	10	12	28.3	23.7	103.4	28.1487	472.242
1208A	4	H	4	20	22	28.4	23.7	103.4	28.2455	473.514
1208A	4	H	4	40	42	28.6	23.7	103.4	28.4389	475.294
1208A	4	H	4	60	62	28.8	23.7	103.4	28.6323	477.583
1208A	4	H	4	80	82	29	23.7	103.4	28.8257	480.382
1208A	4	H	4	100	102	29.2	23.7	103.4	29.0191	482.925
1208A	4	H	4	120	122	29.4	23.7	103.4	29.2126	485.469
1208A	4	H	4	140	142	29.6	23.7	103.4	29.406	488.521
1208A	4	H	5	0	2	29.7	23.7	103.4	29.5027	489.793
1208A	4	H	5	10	12	29.8	23.7	103.4	29.5994	491.32
1208A	4	H	5	20	22	29.9	23.7	103.4	29.6961	493.1
1208A	4	H	5	40	42	30.1	23.7	103.4	29.8896	495.898
1208A	4	H	5	60	62	30.3	23.7	103.4	30.083	498.951
1208A	4	H	5	80	82	30.5	23.7	103.4	30.2764	502.258
1208A	4	H	5	100	102	30.7	23.7	103.4	30.4698	505.819
1208A	4	H	5	120	122	30.9	23.7	103.4	30.6632	508.362
1208A	4	H	5	140	142	31.1	23.7	103.4	30.8567	511.669
1208A	4	H	6	0	2	31.2	23.7	103.4	30.9534	513.45
1208A	4	H	6	10	12	31.3	23.7	103.4	31.0501	515.231
1208A	4	H	6	20	22	31.4	23.7	103.4	31.1468	517.011
1208A	4	H	6	40	42	31.6	23.7	103.4	31.3402	520.318
1208A	4	H	6	60	62	31.8	23.7	103.4	31.5337	523.625
1208A	4	H	6	80	82	32	23.7	103.4	31.7271	526.932
1208A	4	H	6	100	102	32.2	23.7	103.4	31.9205	530.238
1208A	4	H	6	120	122	32.4	23.7	103.4	32.1139	534.054
1208A	4	H	6	140	142	32.6	23.7	103.4	32.3074	538.887
1208A	4	H	7	0	2	32.7	23.7	103.4	32.4041	541.685
1208A	4	H	7	10	12	32.8	23.7	103.4	32.5008	544.738
1208A	4	H	7	20	22	32.9	23.7	103.4	32.5975	549.062
1208A	4	H	7	40	42	33.1	23.7	103.4	32.7909	554.913
1208A	4	H	cc	8	10	33.35	23.7	103.4	33.0327	561.526
1208A	4	H	cc	18	20	33.45	23.7	103.4	33.1294	564.833
1208A	5	H	1	0	2	33.2	33.2	104.8	33.2	567.122
1208A	5	H	1	7	9	33.27	33.2	104.8	33.2668	571.192
1208A	5	H	1	20	22	33.4	33.2	104.8	33.3908	574.499
1208A	5	H	1	40	42	33.6	33.2	104.8	33.5817	581.113
1208A	5	H	1	60	62	33.8	33.2	104.8	33.7725	586.455
1208A	5	H	1	80	82	34	33.2	104.8	33.9634	590.779
1208A	5	H	1	100	102	34.2	33.2	104.8	34.1542	594.849
1208A	5	H	1	120	122	34.4	33.2	104.8	34.345	598.665
1208A	5	H	1	140	142	34.6	33.2	104.8	34.5359	601.717
1208A	5	H	2	7	9	34.77	33.2	104.8	34.6981	604.515
1208A	5	H	2	20	22	34.9	33.2	104.8	34.8221	607.568
1208A	5	H	2	40	42	35.1	33.2	104.8	35.013	612.909
1208A	5	H	2	50	52	35.2	33.2	104.8	35.1084	615.453
1208A	5	H	2	60	62	35.3	33.2	104.8	35.2038	617.488
1208A	5	H	2	80	82	35.5	33.2	104.8	35.3947	621.812
1208A	5	H	2	100	102	35.7	33.2	104.8	35.5855	626.391
1208A	5	H	2	120	122	35.9	33.2	104.8	35.7763	630.715
1208A	5	H	2	140	142	36.1	33.2	104.8	35.9672	634.277
1208A	5	H	3	0	2	36.2	33.2	104.8	36.0626	636.057
1208A	5	H	3	7	9	36.27	33.2	104.8	36.1294	637.329
1208A	5	H	3	20	22	36.4	33.2	104.8	36.2534	640.127
1208A	5	H	3	40	42	36.6	33.2	104.8	36.4443	643.943
1208A	5	H	3	60	62	36.8	33.2	104.8	36.6351	648.521
1208A	5	H	3	80	82	37	33.2	104.8	36.826	652.337
1208A	5	H	3	100	102	37.2	33.2	104.8	37.0168	656.153
1208A	5	H	3	120	122	37.4	33.2	104.8	37.2076	659.459
1208A	5	H	3	140	142	37.6	33.2	104.8	37.3985	663.529
1208A	5	H	4	0	2	37.7	33.2	104.8	37.4939	665.056
1208A	5	H	4	7	9	37.77	33.2	104.8	37.5607	666.328
1208A	5	H	4	20	22	37.9	33.2	104.8	37.6847	668.108
1208A	5	H	4	40	42	38.1	33.2	104.8	37.8756	671.415
1208A	5	H	4	60	62	38.3	33.2	104.8	38.0664	674.467
1208A	5	H	4	80	82	38.5	33.2	104.8	38.2573	677.266
1208A	5	H	4	100	102	38.7	33.2	104.8	38.4481	680.318
1208A	5	H	4	120	122	38.9	33.2	104.8	38.6389	683.116
1208A	5	H	4	140	142	39.1	33.2	104.8	38.8298	686.423
1208A	5	H	5	0	2	39.2	33.2	104.8	38.9252	688.967
1208A	5	H	5	7	9	39.27	33.2	104.8	38.992	691.002
1208A	5	H	5	20	22	39.4	33.2	104.8	39.116	694.563
1208A	5	H	5	30	32	39.5	33.2	104.8	39.2115	697.361
1208A	5	H	5	40	42	39.6	33.2	104.8	39.3069	699.905
1208A	5	H	5	60	62	39.8	33.2	104.8	39.4977	705.246
1208A	5	H	5	80	82	40	33.2	104.8	39.6885	709.571
1208A	5	H	5	100	102	40.2	33.2	104.8	39.8794	713.386
1208A	5	H	5	120	122	40.4	33.2	104.8	40.0702	715.93
1208A	5	H	5	140	142	40.6	33.2	104.8	40.2611	718.728
1208A	5	H	6	0	2	40.7	33.2	104.8	40.3565	720.254
1208A	5	H	6	7	9	40.77	33.2	104.8	40.4233	721.272
1208A	5	H	6	16	18	40.86	33.2	104.8	40.5092	723.052
1208A	5	H	6	22	24	40.92	33.2	104.8	40.5664	723.816
1208A	5	H	6	28	30	40.98	33.2	104.8	40.6237	724.579
1208A	5	H	6	37	39	41.07	33.2	104.8	40.7095	725.873
1208A	5	H	6	51	53	41.21	33.2	104.8	40.8431	727.886
1208A	5	H	6	60	62	41.3	33.2	104.8	40.929	729.412
1208A	5	H	6	67	69	41.37	33.2	104.8	40.9958	730.938
1208A	5	H	6	77	79	41.47	33.2	104.8	41.0912	733.482
1208A	5	H	6	80	82	41.5	33.2	104.8	41.1198	734.245
1208A	5	H	6	82	84	41.52	33.2	104.8	41.1389	734.754
1208A	5	H	6	90	92	41.6	33.2	104.8	41.2153	736.789
1208A	5	H	6	97	99	41.67	33.2	104.8	41.2821	738.315
1208A	5	H	6	100	102	41.7	33.2	104.8	41.3107	739.078
1208A	5	H	6	105	107	41.75	33.2	104.8	41.3584	740.35
1208A	5	H	6	111	113	41.81	33.2	104.8	41.4156	741.622
1208A	5	H	6	113	115	41.83	33.2	104.8	41.4347	742.13
1208A	5	H	6	118	120	41.88	33.2	104.8	41.4824	743.402
1208A	5	H	6	120	122	41.9	33.2	104.8	41.5015	744.165
1208A	5	H	6	125	127	41.95	33.2	104.8	41.5492	745.946
1208A	5	H	6	127	129	41.97	33.2	104.8	41.5683	746.709
1208A	5	H	6	135	137	42.05	33.2	104.8	41.6447	749.762
1208A	5	H	6	140	142	42.1	33.2	104.8	41.6924	751.288
1208A	5	H	7	0	2	42.2	33.2	104.8	41.7878	754.086
1208A	5	H	7	6	8	42.26	33.2	104.8	41.845	755.176
1208A	5	H	7	7	9	42.27	33.2	104.8	41.8546	755.358
1208A	5	H	7	16	18	42.36	33.2	104.8	41.9405	756.884
1208A	5	H	7	20	22	42.4	33.2	104.8	41.9786	757.562
1208A	5	H	7	22	24	42.42	33.2	104.8	41.9977	757.901
1208A	5	H	7	30	32	42.5	33.2	104.8	42.074	758.919
1208A	5	H	7	37	39	42.57	33.2	104.8	42.1408	762.599
1208A	5	H	7	40	42	42.6	33.2	104.8	42.1695	764.176
1208A	5	H	7	45	47	42.65	33.2	104.8	42.2172	766.804
1208A	5	H	7	51	53	42.71	33.2	104.8	42.2744	769.45
1208A	5	H	7	60	62	42.8	33.2	104.8	42.3603	773.418
1208A	5	H	7	67	69	42.87	33.2	104.8	42.4271	775.453
1208A	5	H	7	73	77	42.93	33.2	104.8	42.4844	776.725
1208A	5	H	CC	2	4	42.99	33.2	104.8	42.5416	781.049
1208A	5	H	CC	7	9	43.04	33.2	104.8	42.5893	782.321
1208A	6	H	1	0	4	42.7	42.7	104.9	42.7	786.137
1208A	6	H	1	7	9	42.77	42.7	104.9	42.7667	789.189
1208A	6	H	1	15	18	42.85	42.7	104.9	42.843	790.207
1208A	6	H	1	28	30	42.98	42.7	104.9	42.9669	792.242
1208A	6	H	1	30	32	43	42.7	104.9	42.986	792.75
1208A	6	H	1	37	39	43.07	42.7	104.9	43.0527	794.022
1208A	6	H	1	44	47	43.14	42.7	104.9	43.1194	795.803
1208A	6	H	1	52	54	43.22	42.7	104.9	43.1957	797.583
1208A	6	H	1	62	64	43.32	42.7	104.9	43.291	799.11
1208A	6	H	1	70	72	43.4	42.7	104.9	43.3673	800.636
1208A	6	H	1	75	77	43.45	42.7	104.9	43.415	801.399
1208A	6	H	1	82	84	43.52	42.7	104.9	43.4817	802.671
1208A	6	H	1	90	93	43.6	42.7	104.9	43.558	803.688
1208A	6	H	1	101	103	43.71	42.7	104.9	43.6628	805.469
1208A	6	H	1	105	108	43.75	42.7	104.9	43.701	806.232
1208A	6	H	1	112	114	43.82	42.7	104.9	43.7677	807.25
1208A	6	H	1	122	124	43.92	42.7	104.9	43.863	809.285
1208A	6	H	1	127	129	43.97	42.7	104.9	43.9107	810.048
1208A	6	H	1	135	137	44.05	42.7	104.9	43.9869	811.32
1208A	6	H	1	142	144	44.12	42.7	104.9	44.0537	812.337
1208A	6	H	2	0	4	44.2	42.7	104.9	44.1299	813.609
1208A	6	H	2	7	9	44.27	42.7	104.9	44.1967	814.881
1208A	6	H	2	15	17	44.35	42.7	104.9	44.2729	816.153
1208A	6	H	2	18	20	44.38	42.7	104.9	44.3015	816.407
1208A	6	H	2	29	31	44.49	42.7	104.9	44.4064	818.442
1208A	6	H	2	37	39	44.57	42.7	104.9	44.4827	819.714
1208A	6	H	2	47	49	44.67	42.7	104.9	44.578	821.494
1208A	6	H	2	52	54	44.72	42.7	104.9	44.6256	822.512
1208A	6	H	2	62	64	44.82	42.7	104.9	44.721	824.293
1208A	6	H	2	67	69	44.87	42.7	104.9	44.7686	825.31
1208A	6	H	2	75	77	44.95	42.7	104.9	44.8449	827.091
1208A	6	H	2	82	84	45.02	42.7	104.9	44.9116	828.617
1208A	6	H	2	87	89	45.07	42.7	104.9	44.9593	829.889
1208A	6	H	2	89	91	45.09	42.7	104.9	44.9784	830.143
1208A	6	H	2	112	114	45.32	42.7	104.9	45.1976	834.213
1208A	6	H	2	120	124	45.4	42.7	104.9	45.2739	835.485
1208A	6	H	2	127	129	45.47	42.7	104.9	45.3406	837.266
1208A	6	H	2	135	137	45.55	42.7	104.9	45.4169	839.046
1208A	6	H	2	142	144	45.62	42.7	104.9	45.4836	840.572
1208A	6	H	3	0	4	45.7	42.7	104.9	45.5599	842.862
1208A	6	H	3	4	6	45.74	42.7	104.9	45.598	844.134
1208A	6	H	3	12	15	45.82	42.7	104.9	45.6743	846.677
1208A	6	H	3	16	20	45.86	42.7	104.9	45.7124	848.458
1208A	6	H	3	30	32	46	42.7	104.9	45.8459	852.528
1208A	6	H	3	38	40	46.08	42.7	104.9	45.9221	855.58
1208A	6	H	3	45	48	46.15	42.7	104.9	45.9888	857.615
1208A	6	H	3	52	56	46.22	42.7	104.9	46.0556	859.396
1208A	6	H	3	60	64	46.3	42.7	104.9	46.1318	860.922
1208A	6	H	3	66	69	46.36	42.7	104.9	46.189	862.194
1208A	6	H	3	77	80	46.47	42.7	104.9	46.2939	864.229
1208A	6	H	3	82	85	46.52	42.7	104.9	46.3416	865.246
1208A	6	H	3	90	93	46.6	42.7	104.9	46.4178	866.773
1208A	6	H	3	97	99	46.67	42.7	104.9	46.4846	867.79
1208A	6	H	3	105	107	46.75	42.7	104.9	46.5608	869.316
1208A	6	H	3	112	114	46.82	42.7	104.9	46.6276	870.334
1208A	6	H	3	120	124	46.9	42.7	104.9	46.7038	871.606
1208A	6	H	3	126	129	46.96	42.7	104.9	46.761	872.623
1208A	6	H	3	136	140	47.06	42.7	104.9	46.8563	875.167
1208A	6	H	3	142	144	47.12	42.7	104.9	46.9135	876.184
1208A	6	H	4	0	4	47.2	42.7	104.9	46.9898	877.711
1208A	6	H	4	7	9	47.27	42.7	104.9	47.0565	878.983
1208A	6	H	4	15	17	47.35	42.7	104.9	47.1328	880.254
1208A	6	H	4	22	24	47.42	42.7	104.9	47.1995	881.272
1208A	6	H	4	30	32	47.5	42.7	104.9	47.2758	882.289
1208A	6	H	4	37	39	47.57	42.7	104.9	47.3425	883.307
1208A	6	H	4	45	49	47.65	42.7	104.9	47.4188	884.324
1208A	6	H	4	52	54	47.72	42.7	104.9	47.4855	885.342
1208A	6	H	4	60	63	47.8	42.7	104.9	47.5618	886.105
1208A	6	H	4	67	69	47.87	42.7	104.9	47.6285	887.377
1208A	6	H	4	75	77	47.95	42.7	104.9	47.7048	888.394
1208A	6	H	4	81	84	48.01	42.7	104.9	47.762	889.157
1208A	6	H	4	90	93	48.1	42.7	104.9	47.8478	890.429
1208A	6	H	4	96	99	48.16	42.7	104.9	47.905	891.192
1208A	6	H	4	106	109	48.26	42.7	104.9	48.0003	892.719
1208A	6	H	4	112	114	48.32	42.7	104.9	48.0575	893.736
1208A	6	H	4	120	124	48.4	42.7	104.9	48.1337	894.754
1208A	6	H	4	127	129	48.47	42.7	104.9	48.2005	895.771
1208A	6	H	4	135	137	48.55	42.7	104.9	48.2767	896.789
1208A	6	H	4	141	144	48.61	42.7	104.9	48.3339	897.806
1208A	6	H	5	0	4	48.7	42.7	104.9	48.4197	899.332
1208A	6	H	5	7	9	48.77	42.7	104.9	48.4865	900.35
1208A	6	H	5	17	20	48.87	42.7	104.9	48.5818	902.13
1208A	6	H	5	22	25	48.92	42.7	104.9	48.6295	903.148
1208A	6	H	5	30	32	49	42.7	104.9	48.7057	904.674
1208A	6	H	5	37	39	49.07	42.7	104.9	48.7724	905.946
1208A	6	H	5	45	48	49.15	42.7	104.9	48.8487	907.472
1208A	6	H	5	52	54	49.22	42.7	104.9	48.9154	908.998
1208A	6	H	5	60	63	49.3	42.7	104.9	48.9917	910.525
1208A	6	H	5	67	69	49.37	42.7	104.9	49.0584	912.051
1208A	6	H	5	73	77	49.43	42.7	104.9	49.1156	913.323
1208A	6	H	5	82	84	49.52	42.7	104.9	49.2014	915.358
1208A	6	H	5	90	93	49.6	42.7	104.9	49.2777	917.138
1208A	6	H	5	97	99	49.67	42.7	104.9	49.3444	918.156
1208A	6	H	5	105	107	49.75	42.7	104.9	49.4207	919.682
1208A	6	H	5	112	114	49.82	42.7	104.9	49.4874	920.7
1208A	6	H	5	120	124	49.9	42.7	104.9	49.5637	921.971
1208A	6	H	5	127	129	49.97	42.7	104.9	49.6304	922.989
1208A	6	H	5	137	139	50.07	42.7	104.9	49.7257	924.515
1208A	6	H	5	142	144	50.12	42.7	104.9	49.7734	925.278
1208A	6	H	6	0	4	50.2	42.7	104.9	49.8497	926.55
1208A	6	H	6	8	10	50.28	42.7	104.9	49.9259	927.822
1208A	6	H	6	15	17	50.35	42.7	104.9	49.9927	929.094
1208A	6	H	6	22	24	50.42	42.7	104.9	50.0594	930.366
1208A	6	H	6	29	31	50.49	42.7	104.9	50.1261	931.638
1208A	6	H	6	37	40	50.57	42.7	104.9	50.2024	933.164
1208A	6	H	6	45	49	50.65	42.7	104.9	50.2786	934.944
1208A	6	H	6	52	54	50.72	42.7	104.9	50.3454	936.979
1208A	6	H	6	60	63	50.8	42.7	104.9	50.4216	938.506
1208A	6	H	6	67	69	50.87	42.7	104.9	50.4884	940.032
1208A	6	H	6	75	77	50.95	42.7	104.9	50.5646	941.304
1208A	6	H	6	82	85	51.02	42.7	104.9	50.6314	942.83
1208A	6	H	6	90	93	51.1	42.7	104.9	50.7076	944.865
1208A	6	H	6	97	100	51.17	42.7	104.9	50.7744	946.9
1208A	6	H	6	105	109	51.25	42.7	104.9	50.8506	948.935
1208A	6	H	6	112	114	51.32	42.7	104.9	50.9173	950.97
1208A	6	H	6	120	124	51.4	42.7	104.9	50.9936	952.496
1208A	6	H	6	127	130	51.47	42.7	104.9	51.0603	954.277
1208A	6	H	6	135	137	51.55	42.7	104.9	51.1366	956.057
1208A	6	H	6	142	144	51.62	42.7	104.9	51.2033	957.075
1208A	6	H	7	0	4	51.7	42.7	104.9	51.2796	958.347
1208A	6	H	7	7	9	51.77	42.7	104.9	51.3463	959.364
1208A	6	H	7	15	18	51.85	42.7	104.9	51.4226	960.636
1208A	6	H	7	21	24	51.91	42.7	104.9	51.4798	961.653
1208A	6	H	7	26	28	51.96	42.7	104.9	51.5275	962.417
1208A	6	H	7	30	33	52	42.7	104.9	51.5656	963.688
1208A	6	H	7	37	39	52.07	42.7	104.9	51.6323	964.96
1208A	6	H	7	41	43	52.11	42.7	104.9	51.6704	965.723
1208A	6	H	7	46	48	52.16	42.7	104.9	51.7181	967.25
1208A	6	H	7	51	53	52.21	42.7	104.9	51.7658	968.776
1208A	6	H	7	58	60	52.28	42.7	104.9	51.8325	970.556
1208A	6	H	7	60	64	52.3	42.7	104.9	51.8516	971.32
1208A	6	H	CC	2	4	52.38	42.7	104.9	51.9278	974.372
1208A	6	H	CC	7	9	52.43	42.7	104.9	51.9755	976.916
1208A	6	H	CC	15	17	52.51	42.7	104.9	52.0518	979.459
1208A	6	H	CC	22	24	52.58	42.7	104.9	52.1185	982.512
1208A	7	H	1	0	2	52.2	52.2	105.3	52.2	985.056
1208A	7	H	1	10	12	52.3	52.2	105.3	52.295	990.906
1208A	7	H	1	15	18	52.35	52.2	105.3	52.3425	992.687
1208A	7	H	1	20	22	52.4	52.2	105.3	52.3899	994.976
1208A	7	H	1	30	32	52.5	52.2	105.3	52.4849	997.774
1208A	7	H	1	40	42	52.6	52.2	105.3	52.5799	1000.83
1208A	7	H	1	47	49	52.67	52.2	105.3	52.6463	1004.64
1208A	7	H	1	60	62	52.8	52.2	105.3	52.7698	1010.75
1208A	7	H	1	80	82	53	52.2	105.3	52.9597	1015.58
1208A	7	H	1	100	102	53.2	52.2	105.3	53.1497	1017.87
1208A	7	H	1	120	122	53.4	52.2	105.3	53.3396	1020.16
1208A	7	H	1	140	142	53.6	52.2	105.3	53.5295	1022.96
1208A	7	H	2	0	2	53.7	52.2	105.3	53.6245	1024.23
1208A	7	H	2	10	12	53.8	52.2	105.3	53.7195	1025.76
1208A	7	H	2	20	22	53.9	52.2	105.3	53.8144	1027.28
1208A	7	H	2	40	42	54.1	52.2	105.3	54.0044	1030.08
1208A	7	H	2	60	62	54.3	52.2	105.3	54.1943	1033.39
1208A	7	H	2	67	69	54.37	52.2	105.3	54.2608	1035.42
1208A	7	H	2	70	72	54.4	52.2	105.3	54.2893	1036.69
1208A	7	H	2	75	77	54.45	52.2	105.3	54.3368	1038.47
1208A	7	H	2	80	82	54.5	52.2	105.3	54.3842	1040.17
1208A	7	H	2	84	86	54.54	52.2	105.3	54.4222	1041.53
1208A	7	H	2	90	92	54.6	52.2	105.3	54.4792	1043.82
1208A	7	H	2	96	98	54.66	52.2	105.3	54.5362	1045.85
1208A	7	H	2	100	102	54.7	52.2	105.3	54.5742	1046.87
1208A	7	H	2	120	122	54.9	52.2	105.3	54.7641	1052.21
1208A	7	H	2	140	142	55.1	52.2	105.3	54.954	1057.04
1208A	7	H	3	0	2	55.2	52.2	105.3	55.049	1059.08
1208A	7	H	3	10	12	55.3	52.2	105.3	55.144	1061.11
1208A	7	H	3	20	22	55.4	52.2	105.3	55.2389	1062.54
1208A	7	H	3	40	42	55.6	52.2	105.3	55.4289	1065.39
1208A	7	H	3	60	62	55.8	52.2	105.3	55.6188	1068.24
1208A	7	H	3	80	82	56	52.2	105.3	55.8087	1071.29
1208A	7	H	3	100	102	56.2	52.2	105.3	55.9987	1074.59
1208A	7	H	3	120	122	56.4	52.2	105.3	56.1886	1077.65
1208A	7	H	3	140	142	56.6	52.2	105.3	56.3785	1081.46
1208A	7	H	4	0	2	56.7	52.2	105.3	56.4735	1083.37
1208A	7	H	4	10	12	56.8	52.2	105.3	56.5685	1085.28
1208A	7	H	4	20	22	56.9	52.2	105.3	56.6634	1086.8
1208A	7	H	4	40	42	57.1	52.2	105.3	56.8534	1090.11
1208A	7	H	4	60	62	57.3	52.2	105.3	57.0433	1093.29
1208A	7	H	4	80	82	57.5	52.2	105.3	57.2332	1096.47
1208A	7	H	4	100	102	57.7	52.2	105.3	57.4232	1102.32
1208A	7	H	4	120	122	57.9	52.2	105.3	57.6131	1107.15
1208A	7	H	4	140	142	58.1	52.2	105.3	57.803	1110.97
1208A	7	H	5	0	2	58.2	52.2	105.3	57.898	1116.06
1208A	7	H	5	10	12	58.3	52.2	105.3	57.993	1118.03
1208A	7	H	5	20	22	58.4	52.2	105.3	58.0879	1120
1208A	7	H	5	40	42	58.6	52.2	105.3	58.2779	1123.94
1208A	7	H	5	60	62	58.8	52.2	105.3	58.4678	1127.25
1208A	7	H	5	80	82	59	52.2	105.3	58.6577	1130.3
1208A	7	H	5	100	102	59.2	52.2	105.3	58.8477	1133.1
1208A	7	H	5	120	122	59.4	52.2	105.3	59.0376	1136.41
1208A	7	H	5	140	142	59.6	52.2	105.3	59.2275	1139.97
1208A	7	H	6	0	2	59.7	52.2	105.3	59.3225	1142
1208A	7	H	6	10	12	59.8	52.2	105.3	59.4175	1144.8
1208A	7	H	6	20	22	59.9	52.2	105.3	59.5124	1147.34
1208A	7	H	6	40	42	60.1	52.2	105.3	59.7024	1154.21
1208A	7	H	6	60	62	60.3	52.2	105.3	59.8923	1162.1
1208A	7	H	6	80	82	60.5	52.2	105.3	60.0822	1168.71
1208A	7	H	6	100	102	60.7	52.2	105.3	60.2722	1174.05
1208A	7	H	6	120	122	60.9	52.2	105.3	60.4621	1178.89
1208A	7	H	6	140	142	61.1	52.2	105.3	60.652	1184.99
1208A	7	H	7	0	2	61.2	52.2	105.3	60.747	1189.06
1208A	7	H	7	10	12	61.3	52.2	105.3	60.842	1191.61
1208A	7	H	7	20	22	61.4	52.2	105.3	60.9369	1194.91
1208A	7	H	7	40	42	61.6	52.2	105.3	61.1269	1201.27
1208A	7	H	7	60	62	61.8	52.2	105.3	61.3168	1206.36
1208A	7	H	cc	8	10	61.94	52.2	105.3	61.4498	1210.43
1208A	7	H	cc	18	20	62.04	52.2	105.3	61.5447	1215.52
1208A	7	H	cc	26	28	62.12	52.2	105.3	61.6207	1220.1
1208A	8	H	1	0	2	61.7	61.7	104.7	61.7	1225.95
1208A	8	H	1	8	10	61.78	61.7	104.7	61.7764	1229.25
1208A	8	H	1	20	22	61.9	61.7	104.7	61.891	1233.07
1208A	8	H	1	40	42	62.1	61.7	104.7	62.082	1242.99
1208A	8	H	1	60	62	62.3	61.7	104.7	62.2731	1248.08
1208A	8	H	1	80	82	62.5	61.7	104.7	62.4641	1252.66
1208A	8	H	1	100	102	62.7	61.7	104.7	62.6551	1255.96
1208A	8	H	1	120	122	62.9	61.7	104.7	62.8461	1259.52
1208A	8	H	1	140	142	63.1	61.7	104.7	63.0372	1263.08
1208A	8	H	2	0	2	63.2	61.7	104.7	63.1327	1264.86
1208A	8	H	2	9	11	63.29	61.7	104.7	63.2186	1266.39
1208A	8	H	2	20	22	63.4	61.7	104.7	63.3237	1268.68
1208A	8	H	2	40	42	63.6	61.7	104.7	63.5147	1272.24
1208A	8	H	2	60	62	63.8	61.7	104.7	63.7057	1276.31
1208A	8	H	2	80	82	64	61.7	104.7	63.8968	1280.13
1208A	8	H	2	100	102	64.2	61.7	104.7	64.0878	1283.94
1208A	8	H	2	120	122	64.4	61.7	104.7	64.2788	1287.76
1208A	8	H	2	140	142	64.6	61.7	104.7	64.4698	1290.56
1208A	8	H	3	0	2	64.7	61.7	104.7	64.5653	1292.34
1208A	8	H	3	9	11	64.79	61.7	104.7	64.6513	1293.86
1208A	8	H	3	20	22	64.9	61.7	104.7	64.7564	1295.9
1208A	8	H	3	40	42	65.1	61.7	104.7	64.9474	1300.22
1208A	8	H	3	60	62	65.3	61.7	104.7	65.1384	1305.06
1208A	8	H	3	80	82	65.5	61.7	104.7	65.3294	1310.14
1208A	8	H	3	100	102	65.7	61.7	104.7	65.5204	1317.27
1208A	8	H	3	120	122	65.9	61.7	104.7	65.7115	1322.86
1208A	8	H	3	140	142	66.1	61.7	104.7	65.9025	1328.46
1208A	8	H	4	0	2	66.2	61.7	104.7	65.998	1331
1208A	8	H	4	11	13	66.31	61.7	104.7	66.1031	1333.8
1208A	8	H	4	20	22	66.4	61.7	104.7	66.189	1335.83
1208A	8	H	4	40	42	66.6	61.7	104.7	66.38	1339.4
1208A	8	H	4	60	62	66.8	61.7	104.7	66.5711	1343.47
1208A	8	H	4	80	82	67	61.7	104.7	66.7621	1347.54
1208A	8	H	4	100	102	67.2	61.7	104.7	66.9531	1351.35
1208A	8	H	4	120	122	67.4	61.7	104.7	67.1441	1355.68
1208A	8	H	4	140	142	67.6	61.7	104.7	67.3351	1360
1208A	8	H	5	0	2	67.7	61.7	104.7	67.4307	1362.29
1208A	8	H	5	10	12	67.8	61.7	104.7	67.5262	1365.09
1208A	8	H	5	20	22	67.9	61.7	104.7	67.6217	1367.63
1208A	8	H	5	40	42	68.1	61.7	104.7	67.8127	1371.7
1208A	8	H	5	60	62	68.3	61.7	104.7	68.0037	1375.26
1208A	8	H	5	80	82	68.5	61.7	104.7	68.1947	1379.33
1208A	8	H	5	100	102	68.7	61.7	104.7	68.3858	1383.66
1208A	8	H	5	120	122	68.9	61.7	104.7	68.5768	1388.24
1208A	8	H	5	140	142	69.1	61.7	104.7	68.7678	1393.32
1208A	8	H	6	0	2	69.2	61.7	104.7	68.8633	1396.38
1208A	8	H	6	10	12	69.3	61.7	104.7	68.9588	1399.55
1208A	8	H	6	20	22	69.4	61.7	104.7	69.0543	1402.73
1208A	8	H	6	40	42	69.6	61.7	104.7	69.2454	1406.8
1208A	8	H	6	60	62	69.8	61.7	104.7	69.4364	1410.37
1208A	8	H	6	80	82	70	61.7	104.7	69.6274	1413.67
1208A	8	H	6	100	102	70.2	61.7	104.7	69.8184	1416.98
1208A	8	H	6	120	122	70.4	61.7	104.7	70.0095	1420.03
1208A	8	H	6	140	142	70.6	61.7	104.7	70.2005	1423.34
1208A	8	H	7	0	2	70.7	61.7	104.7	70.296	1424.86
1208A	8	H	7	20	22	70.9	61.7	104.7	70.487	1428.81
1208A	8	H	7	40	42	71.1	61.7	104.7	70.678	1432.75
1208A	8	H	7	60	62	71.3	61.7	104.7	70.8691	1437.33
1208A	8	H	cc	6	8	71.5	61.7	104.7	71.0601	1442.93
1208A	8	H	cc	14	16	71.58	61.7	104.7	71.1365	1445.47
1208A	9	H	1	0	2	71.2	71.2	104.6	71.2	1447
1208A	9	H	1	10	12	71.3	71.2	104.6	71.2956	1449.28
1208A	9	H	1	20	22	71.4	71.2	104.6	71.3912	1450.81
1208A	9	H	1	40	42	71.6	71.2	104.6	71.5824	1453.86
1208A	9	H	1	60	62	71.8	71.2	104.6	71.7736	1456.92
1208A	9	H	1	80	82	72	71.2	104.6	71.9648	1460.48
1208A	9	H	1	100	102	72.2	71.2	104.6	72.156	1469.13
1208A	9	H	1	120	122	72.4	71.2	104.6	72.3472	1472.05
1208A	9	H	1	140	142	72.6	71.2	104.6	72.5384	1474.98
1208A	9	H	2	0	2	72.7	71.2	104.6	72.634	1476.76
1208A	9	H	2	9	11	72.79	71.2	104.6	72.7201	1478.54
1208A	9	H	2	20	22	72.9	71.2	104.6	72.8252	1480.57
1208A	9	H	2	40	42	73.1	71.2	104.6	73.0164	1484.64
1208A	9	H	2	60	62	73.3	71.2	104.6	73.2076	1488.2
1208A	9	H	2	80	82	73.5	71.2	104.6	73.3989	1492.02
1208A	9	H	2	100	102	73.7	71.2	104.6	73.5901	1495.33
1208A	9	H	2	120	122	73.9	71.2	104.6	73.7813	1498.55
1208A	9	H	2	140	142	74.1	71.2	104.6	73.9725	1501.77
1208A	9	H	3	0	2	74.2	71.2	104.6	74.0681	1503.38
1208A	9	H	3	10	12	74.3	71.2	104.6	74.1637	1504.99
1208A	9	H	3	20	22	74.4	71.2	104.6	74.2593	1507.11
1208A	9	H	3	40	42	74.6	71.2	104.6	74.4505	1511.35
1208A	9	H	3	60	62	74.8	71.2	104.6	74.6417	1516.18
1208A	9	H	3	80	82	75	71.2	104.6	74.8329	1520.51
1208A	9	H	3	100	102	75.2	71.2	104.6	75.0241	1524.83
1208A	9	H	3	120	122	75.4	71.2	104.6	75.2153	1528.39
1208A	9	H	3	140	142	75.6	71.2	104.6	75.4065	1531.7
1208A	9	H	4	0	2	75.7	71.2	104.6	75.5021	1533.23
1208A	9	H	4	10	12	75.8	71.2	104.6	75.5977	1535.01
1208A	9	H	4	20	22	75.9	71.2	104.6	75.6933	1536.53
1208A	9	H	4	40	42	76.1	71.2	104.6	75.8845	1539.59
1208A	9	H	4	60	62	76.3	71.2	104.6	76.0757	1542.51
1208A	9	H	4	80	82	76.5	71.2	104.6	76.2669	1545.44
1208A	9	H	4	100	102	76.7	71.2	104.6	76.4581	1548.49
1208A	9	H	4	120	122	76.9	71.2	104.6	76.6493	1552.56
1208A	9	H	4	140	142	77.1	71.2	104.6	76.8405	1557.65
1208A	9	H	5	0	2	77.2	71.2	104.6	76.9361	1560.19
1208A	9	H	5	10	12	77.3	71.2	104.6	77.0317	1562.73
1208A	9	H	5	20	22	77.4	71.2	104.6	77.1273	1564.77
1208A	9	H	5	40	42	77.6	71.2	104.6	77.3185	1568.84
1208A	9	H	5	60	62	77.8	71.2	104.6	77.5098	1572.91
1208A	9	H	5	80	82	78	71.2	104.6	77.701	1576.47
1208A	9	H	5	120	122	78.4	71.2	104.6	78.0834	1583.34
1208A	9	H	5	140	142	78.6	71.2	104.6	78.2746	1586.65
1208A	9	H	6	0	2	78.7	71.2	104.6	78.3702	1588.68
1208A	9	H	6	10	12	78.8	71.2	104.6	78.4658	1590.97
1208A	9	H	6	20	22	78.9	71.2	104.6	78.5614	1593.77
1208A	9	H	6	40	42	79.1	71.2	104.6	78.7526	1598.35
1208A	9	H	6	60	62	79.3	71.2	104.6	78.9438	1603.18
1208A	9	H	6	80	82	79.5	71.2	104.6	79.135	1608.52
1208A	9	H	6	100	102	79.7	71.2	104.6	79.3262	1613.99
1208A	9	H	6	120	122	79.9	71.2	104.6	79.5174	1619.46
1208A	9	H	6	140	142	80.1	71.2	104.6	79.7086	1624.55
1208A	9	H	7	0	2	80.2	71.2	104.6	79.8042	1627.09
1208A	9	H	7	10	12	80.3	71.2	104.6	79.8998	1629.89
1208A	9	H	7	20	22	80.4	71.2	104.6	79.9954	1633.45
1208A	9	H	7	40	42	80.6	71.2	104.6	80.1866	1639.81
1208A	9	H	7	60	62	80.8	71.2	104.6	80.3778	1646.42
1208A	9	H	cc	7	9	80.91	71.2	104.6	80.483	1650.49
1208A	9	H	cc	17	19	81.01	71.2	104.6	80.5786	1654.05
1208A	9	H	cc	22	24	81.06	71.2	104.6	80.6264	1655.58
1208A	10	H	1	0	2	80.7	80.7	104.9	80.7	1657.87
1208A	10	H	1	10	12	80.8	80.7	104.9	80.7953	1660.67
1208A	10	H	1	20	22	80.9	80.7	104.9	80.8907	1663.21
1208A	10	H	1	40	42	81.1	80.7	104.9	81.0813	1667.03
1208A	10	H	1	60	62	81.3	80.7	104.9	81.272	1670.33
1208A	10	H	1	80	82	81.5	80.7	104.9	81.4626	1673.13
1208A	10	H	1	100	102	81.7	80.7	104.9	81.6533	1675.93
1208A	10	H	1	120	122	81.9	80.7	104.9	81.8439	1679.24
1208A	10	H	1	140	142	82.1	80.7	104.9	82.0346	1683.99
1208A	10	H	2	0	2	82.2	80.7	104.9	82.1299	1686.36
1208A	10	H	2	10	12	82.3	80.7	104.9	82.2253	1687.63
1208A	10	H	2	40	42	82.6	80.7	104.9	82.5112	1690.68
1208A	10	H	2	80	82	83	80.7	104.9	82.8926	1695.01
1208A	10	H	2	100	102	83.2	80.7	104.9	83.0832	1697.81
1208A	10	H	2	120	122	83.4	80.7	104.9	83.2739	1700.6
1208A	10	H	2	140	142	83.6	80.7	104.9	83.4645	1704.17
1208A	10	H	3	0	2	83.7	80.7	104.9	83.5599	1705.69
1208A	10	H	3	10	12	83.8	80.7	104.9	83.6552	1707.98
1208A	10	H	3	20	22	83.9	80.7	104.9	83.7505	1709.51
1208A	10	H	3	40	42	84.1	80.7	104.9	83.9412	1712.81
1208A	10	H	3	60	62	84.3	80.7	104.9	84.1318	1715.87
1208A	10	H	3	80	82	84.5	80.7	104.9	84.3225	1719.17
1208A	10	H	3	100	102	84.7	80.7	104.9	84.5132	1722.48
1208A	10	H	3	120	122	84.9	80.7	104.9	84.7038	1726.04
1208A	10	H	3	140	142	85.1	80.7	104.9	84.8945	1729.6
1208A	10	H	4	0	2	85.2	80.7	104.9	84.9898	1732.66
1208A	10	H	4	10	12	85.3	80.7	104.9	85.0851	1736.72
1208A	10	H	4	20	22	85.4	80.7	104.9	85.1805	1739.01
1208A	10	H	4	40	42	85.6	80.7	104.9	85.3711	1742.58
1208A	10	H	4	60	62	85.8	80.7	104.9	85.5618	1745.88
1208A	10	H	4	80	82	86	80.7	104.9	85.7524	1749.44
1208A	10	H	4	100	102	86.2	80.7	104.9	85.9431	1752.75
1208A	10	H	4	120	122	86.4	80.7	104.9	86.1337	1756.06
1208A	10	H	4	140	142	86.6	80.7	104.9	86.3244	1760.38

## Sheet: d18O ODP 1208
Site	Hole	Core	Type	Section	Interval-top	Interval-bottom	mbsf	unique ("recompressed") depth (m)	Age HMM Stack	δ18O (‰)	δ18O (‰)_adj (+0.64 to cibs)	Species
1208	A	3	H	6	4	6	21.74	21.6067	334.229	3.91064	3.91064	Uvigerina spp.
1208	A	3	H	6	4	6	21.74	21.6067	334.229	4.22576	4.22576	Uvigerina spp.
1208	A	3	H	6	14	16	21.84	21.7049	336.53	4.53396	4.53396	Uvigerina spp.
1208	A	3	H	6	24	26	21.94	21.8031	338.413	4.609	4.609	Uvigerina spp.
1208	A	3	H	6	34	36	22.04	21.9014	340.505	4.58421	4.58421	Uvigerina spp.
1208	A	3	H	6	34	36	22.04	21.9014	340.505	4.86398	4.86398	Uvigerina spp.
1208	A	3	H	6	43	45	22.13	21.9898	342.806	4.92059	4.92059	Uvigerina spp.
1208	A	3	H	6	54	56	22.24	22.0978	345.107	4.79835	4.79835	Uvigerina spp.
1208	A	3	H	6	64	66	22.34	22.1961	346.989	4.65447	4.65447	Uvigerina spp.
1208	A	3	H	6	73	75	22.43	22.2845	348.244	4.47571	4.47571	Uvigerina spp.
1208	A	3	H	6	84	86	22.54	22.3925	350.546	4.56481	4.56481	Uvigerina spp.
1208	A	3	H	6	84	86	22.54	22.3925	350.546	4.88	4.88	Uvigerina spp.
1208	A	3	H	6	94	96	22.64	22.4908	352.219	4.47957	4.47957	Uvigerina spp.
1208	A	3	H	6	104	106	22.74	22.589	353.893	4.6651	4.6651	Uvigerina spp.
1208	A	3	H	6	114	116	22.84	22.6872	355.775	4.58615	4.58615	Uvigerina spp.
1208	A	3	H	6	124	126	22.94	22.7855	357.449	4.48163	4.48163	Uvigerina spp.
1208	A	3	H	6	124	126	22.94	22.7855	357.449	4.49987	4.49987	Uvigerina spp.
1208	A	3	H	6	134	136	23.04	22.8837	358.913	4.58876	4.58876	Uvigerina spp.
1208	A	3	H	6	143	145	23.13	22.9721	360.377	4.53448	4.53448	Uvigerina spp.
1208	A	3	H	7	4	6	23.24	23.0802	362.051	4.48387	4.48387	Uvigerina spp.
1208	A	3	H	7	4	6	23.24	23.0802	362.051	4.51867	4.51867	Uvigerina spp.
1208	A	3	H	7	14	16	23.34	23.1784	363.306	4.57778	4.57778	Uvigerina spp.
1208	A	3	H	7	24	26	23.44	23.2766	364.979	4.51766	4.51766	Uvigerina spp.
1208	A	3	H	7	33	35	23.53	23.365	366.653	4.68572	4.68572	Uvigerina spp.
1208	A	3	H	7	42	44	23.62	23.4534	367.699	4.69925	4.69925	Uvigerina spp.
1208	A	3	H	cc	8	10	23.72	23.5517	368.954	4.53048	4.53048	Uvigerina spp.
1208	A	3	H	cc	16	18	23.8	23.6303	370	4.37347	4.37347	Uvigerina spp.
1208	A	4	H	1	0	2	23.7	23.7	400.763	2.97651	2.97651	Uvigerina spp.
1208	A	4	H	1	10	12	23.8	23.7967	406.359	3.24285	3.24285	Uvigerina spp.
1208	A	4	H	1	20	22	23.9	23.8934	409.921	3.14659	3.14659	Uvigerina spp.
1208	A	4	H	1	40	42	24.1	24.0868	416.789	3.69341	3.69341	Uvigerina spp.
1208	A	4	H	1	60	62	24.3	24.2803	421.367	4.01099	4.01099	Uvigerina spp.
1208	A	4	H	1	100	102	24.7	24.6671	428.235	4.87674	4.87674	Uvigerina spp.
1208	A	4	H	1	120	122	24.9	24.8605	431.033	5.09623	5.09623	Uvigerina spp.
1208	A	4	H	1	140	142	25.1	25.054	433.831	4.97385	4.97385	Uvigerina spp.
1208	A	4	H	2	0	2	25.2	25.1507	435.103	4.87803	4.87803	Uvigerina spp.
1208	A	4	H	2	10	12	25.3	25.2474	436.884	4.85919	4.85919	Uvigerina spp.
1208	A	4	H	2	20	22	25.4	25.3441	437.901	4.72491	4.72491	Uvigerina spp.
1208	A	4	H	2	40	42	25.6	25.5375	440.7	4.89209	4.89209	Uvigerina spp.
1208	A	4	H	2	60	62	25.8	25.7309	442.989	4.51073	4.51073	Uvigerina spp.
1208	A	4	H	2	60	62	25.8	25.7309	442.989	5.05553	5.05553	Uvigerina spp.
1208	A	4	H	2	80	82	26	25.9244	445.533	5.03063	5.03063	Uvigerina spp.
1208	A	4	H	2	80	82	26	25.9244	445.533	5.04671	5.04671	Uvigerina spp.
1208	A	4	H	2	100	102	26.2	26.1178	448.076	4.70563	4.70563	Uvigerina spp.
1208	A	4	H	2	120	122	26.4	26.3112	450.62	4.67566	4.67566	Uvigerina spp.
1208	A	4	H	2	140	142	26.6	26.5046	452.401	4.65235	4.65235	Uvigerina spp.
1208	A	4	H	3	0	2	26.7	26.6014	453.927	4.58129	4.58129	Uvigerina spp.
1208	A	4	H	3	10	12	26.8	26.6981	455.199	4.50368	4.50368	Uvigerina spp.
1208	A	4	H	3	20	22	26.9	26.7948	456.725	4.55863	4.55863	Uvigerina spp.
1208	A	4	H	3	40	42	27.1	26.9882	459.014	4.58452	4.58452	Uvigerina spp.
1208	A	4	H	3	60	62	27.3	27.1816	460.795	4.54307	4.54307	Uvigerina spp.
1208	A	4	H	3	80	82	27.5	27.375	463.084	4.59625	4.59625	Uvigerina spp.
1208	A	4	H	3	100	102	27.7	27.5685	465.119	4.64373	4.64373	Uvigerina spp.
1208	A	4	H	3	120	122	27.9	27.7619	467.154	4.53201	4.53201	Uvigerina spp.
1208	A	4	H	3	140	142	28.1	27.9553	469.444	4.49351	4.49351	Uvigerina spp.
1208	A	4	H	4	0	2	28.2	28.052	470.715	4.57556	4.57556	Uvigerina spp.
1208	A	4	H	4	10	12	28.3	28.1487	472.242	4.45334	4.45334	Uvigerina spp.
1208	A	4	H	4	20	22	28.4	28.2455	473.514	4.35941	4.35941	Uvigerina spp.
1208	A	4	H	4	40	42	28.6	28.4389	475.294	4.41058	4.41058	Uvigerina spp.
1208	A	4	H	4	60	62	28.8	28.6323	477.583	4.40364	4.40364	Uvigerina spp.
1208	A	4	H	4	80	82	29	28.8257	480.382	4.22802	4.22802	Uvigerina spp.
1208	A	4	H	4	100	102	29.2	29.0191	482.925	3.6343	3.6343	Uvigerina spp.
1208	A	4	H	4	100	102	29.2	29.0191	482.925	3.99233	3.99233	Uvigerina spp.
1208	A	4	H	4	120	122	29.4	29.2126	485.469	3.99103	3.99103	Uvigerina spp.
1208	A	4	H	4	120	122	29.4	29.2126	485.469	4.0231	4.0231	Uvigerina spp.
1208	A	4	H	4	140	142	29.6	29.406	488.521	3.77043	3.77043	Uvigerina spp.
1208	A	4	H	5	0	2	29.7	29.5027	489.793	3.54105	3.54105	Uvigerina spp.
1208	A	4	H	5	10	12	29.8	29.5994	491.32	3.61857	3.61857	Uvigerina spp.
1208	A	4	H	5	20	22	29.9	29.6961	493.1	3.64099	3.64099	Uvigerina spp.
1208	A	4	H	5	40	42	30.1	29.8896	495.898	3.51303	3.51303	Uvigerina spp.
1208	A	4	H	5	60	62	30.3	30.083	498.951	3.57106	3.57106	Uvigerina spp.
1208	A	4	H	5	80	82	30.5	30.2764	502.258	3.62039	3.62039	Uvigerina spp.
1208	A	4	H	5	100	102	30.7	30.4698	505.819	4.23988	4.23988	Uvigerina spp.
1208	A	4	H	5	120	122	30.9	30.6632	508.362	3.82311	3.82311	Uvigerina spp.
1208	A	4	H	5	140	142	31.1	30.8567	511.669	4.20982	4.20982	Uvigerina spp.
1208	A	4	H	6	0	2	31.2	30.9534	513.45	4.22432	4.22432	Uvigerina spp.
1208	A	4	H	6	10	12	31.3	31.0501	515.231	4.28821	4.28821	Uvigerina spp.
1208	A	4	H	6	20	22	31.4	31.1468	517.011	4.22678	4.22678	Uvigerina spp.
1208	A	4	H	6	40	42	31.6	31.3402	520.318	4.09001	4.09001	Uvigerina spp.
1208	A	4	H	6	80	82	32	31.7271	526.932	4.03073	4.03073	Uvigerina spp.
1208	A	4	H	6	100	102	32.2	31.9205	530.238	4.17089	4.17089	Uvigerina spp.
1208	A	4	H	6	120	122	32.4	32.1139	534.054	4.11163	4.11163	Uvigerina spp.
1208	A	4	H	6	140	142	32.6	32.3074	538.887	4.59074	4.59074	Uvigerina spp.
1208	A	4	H	7	0	2	32.7	32.4041	541.685	4.69207	4.69207	Uvigerina spp.
1208	A	4	H	7	10	12	32.8	32.5008	544.738	4.35328	4.35328	Uvigerina spp.
1208	A	4	H	7	20	22	32.9	32.5975	549.062	4.56681	4.56681	Uvigerina spp.
1208	A	4	H	7	40	42	33.1	32.7909	554.913	4.50626	4.50626	Uvigerina spp.
1208	A	4	H	cc	8	10	33.35	33.0327	561.526	4.33198	4.33198	Uvigerina spp.
1208	A	4	H	cc	18	20	33.45	33.1294	564.833	4.24813	4.24813	Uvigerina spp.
1208	A	5	H	1	0	2	33.2	33.2	567.122	3.50962	3.50962	Uvigerina spp.
1208	A	5	H	1	7	9	33.27	33.2668	571.192	3.75099	3.75099	Uvigerina spp.
1208	A	5	H	1	20	22	33.4	33.3908	574.499	3.81999	3.81999	Uvigerina spp.
1208	A	5	H	1	40	42	33.6	33.5817	581.113	3.95503	3.95503	Uvigerina spp.
1208	A	5	H	1	60	62	33.8	33.7725	586.455	4.26051	4.26051	Uvigerina spp.
1208	A	5	H	1	80	82	34	33.9634	590.779	3.83321	3.83321	Uvigerina spp.
1208	A	5	H	1	100	102	34.2	34.1542	594.849	3.96535	3.96535	Uvigerina spp.
1208	A	5	H	1	120	122	34.4	34.345	598.665	4.15212	4.15212	Uvigerina spp.
1208	A	5	H	1	140	142	34.6	34.5359	601.717	4.15694	4.15694	Uvigerina spp.
1208	A	5	H	2	7	9	34.77	34.6981	604.515	4.21077	4.21077	Uvigerina spp.
1208	A	5	H	2	20	22	34.9	34.8221	607.568	3.87791	3.87791	Uvigerina spp.
1208	A	5	H	2	40	42	35.1	35.013	612.909	3.73861	3.73861	Uvigerina spp.
1208	A	5	H	2	50	52	35.2	35.1084	615.453	3.65164	3.65164	Uvigerina spp.
1208	A	5	H	2	50	52	35.2	35.1084	615.453	3.77646	3.77646	Uvigerina spp.
1208	A	5	H	2	60	62	35.3	35.2038	617.488	3.85832	3.85832	Uvigerina spp.
1208	A	5	H	2	80	82	35.5	35.3947	621.812	4.39087	4.39087	Uvigerina spp.
1208	A	5	H	2	100	102	35.7	35.5855	626.391	5.17755	5.17755	Uvigerina spp.
1208	A	5	H	2	120	122	35.9	35.7763	630.715	5.10937	5.10937	Uvigerina spp.
1208	A	5	H	2	140	142	36.1	35.9672	634.277	5.08065	5.08065	Uvigerina spp.
1208	A	5	H	3	0	2	36.2	36.0626	636.057	5.0503	5.0503	Uvigerina spp.
1208	A	5	H	3	7	9	36.27	36.1294	637.329	5.02135	5.02135	Uvigerina spp.
1208	A	5	H	3	20	22	36.4	36.2534	640.127	5.09363	5.09363	Uvigerina spp.
1208	A	5	H	3	40	42	36.6	36.4443	643.943	4.9249	4.9249	Uvigerina spp.
1208	A	5	H	3	60	62	36.8	36.6351	648.521	4.78804	4.78804	Uvigerina spp.
1208	A	5	H	3	80	82	37	36.826	652.337	4.81089	4.81089	Uvigerina spp.
1208	A	5	H	3	100	102	37.2	37.0168	656.153	4.4624	4.4624	Uvigerina spp.
1208	A	5	H	3	120	122	37.4	37.2076	659.459	4.67183	4.67183	Uvigerina spp.
1208	A	5	H	3	140	142	37.6	37.3985	663.529	4.22545	4.22545	Uvigerina spp.
1208	A	5	H	4	0	2	37.7	37.4939	665.056	4.52266	4.52266	Uvigerina spp.
1208	A	5	H	4	7	9	37.77	37.5607	666.328	4.4625	4.4625	Uvigerina spp.
1208	A	5	H	4	20	22	37.9	37.6847	668.108	4.62351	4.62351	Uvigerina spp.
1208	A	5	H	4	40	42	38.1	37.8756	671.415	4.32934	4.32934	Uvigerina spp.
1208	A	5	H	4	60	62	38.3	38.0664	674.467	4.51916	4.51916	Uvigerina spp.
1208	A	5	H	4	80	82	38.5	38.2573	677.266	4.46623	4.46623	Uvigerina spp.
1208	A	5	H	4	100	102	38.7	38.4481	680.318	4.39909	4.39909	Uvigerina spp.
1208	A	5	H	4	120	122	38.9	38.6389	683.116	4.28127	4.28127	Uvigerina spp.
1208	A	5	H	4	140	142	39.1	38.8298	686.423	4.37699	4.37699	Uvigerina spp.
1208	A	5	H	5	0	2	39.2	38.9252	688.967	3.99464	3.99464	Uvigerina spp.
1208	A	5	H	5	7	9	39.27	38.992	691.002	3.77095	3.77095	Uvigerina spp.
1208	A	5	H	5	20	22	39.4	39.116	694.563	3.60337	3.60337	Uvigerina spp.
1208	A	5	H	5	30	32	39.5	39.2115	697.361	3.93643	3.93643	Uvigerina spp.
1208	A	5	H	5	40	42	39.6	39.3069	699.905	3.35616	3.35616	Uvigerina spp.
1208	A	5	H	5	60	62	39.8	39.4977	705.246	3.80629	3.80629	Uvigerina spp.
1208	A	5	H	5	80	82	40	39.6885	709.571	4.44297	4.44297	Uvigerina spp.
1208	A	5	H	5	100	102	40.2	39.8794	713.386	4.6129	4.6129	Uvigerina spp.
1208	A	5	H	5	120	122	40.4	40.0702	715.93	4.0227	4.0227	Uvigerina spp.
1208	A	5	H	5	120	122	40.4	40.0702	715.93	4.21112	4.21112	Uvigerina spp.
1208	A	5	H	5	140	142	40.6	40.2611	718.728	4.63951	4.63951	Uvigerina spp.
1208	A	5	H	6	0	2	40.7	40.3565	720.254	4.50027	4.50027	Uvigerina spp.
1208	A	5	H	6	7	9	40.77	40.4233	721.272	4.63563	4.63563	Uvigerina spp.
1208	A	5	H	6	16	18	40.86	40.5092	723.052	4.51804	4.51804	Uvigerina spp.
1208	A	5	H	6	28	30	40.98	40.6237	724.579	4.68376	4.68376	Uvigerina spp.
1208	A	5	H	6	51	53	41.21	40.8431	727.886	4.32617	4.32617	Uvigerina spp.
1208	A	5	H	6	60	62	41.3	40.929	729.412	4.4065	4.4065	Uvigerina spp.
1208	A	5	H	6	67	69	41.37	40.9958	730.938	4.37043	4.37043	Uvigerina spp.
1208	A	5	H	6	77	79	41.47	41.0912	733.482	4.22972	4.22972	Uvigerina spp.
1208	A	5	H	6	82	84	41.52	41.1389	734.754	4.27681	4.27681	Uvigerina spp.
1208	A	5	H	6	90	92	41.6	41.2153	736.789	4.42827	4.42827	Uvigerina spp.
1208	A	5	H	6	97	99	41.67	41.2821	738.315	4.45689	4.45689	Uvigerina spp.
1208	A	5	H	6	105	107	41.75	41.3584	740.35	4.10803	4.10803	Uvigerina spp.
1208	A	5	H	6	111	113	41.81	41.4156	741.622	4.52445	4.52445	Uvigerina spp.
1208	A	5	H	6	113	115	41.83	41.4347	742.13	4.27991	4.27991	Uvigerina spp.
1208	A	5	H	6	118	120	41.88	41.4824	743.402	4.49986	4.49986	Uvigerina spp.
1208	A	5	H	6	120	122	41.9	41.5015	744.165	3.91493	3.91493	Uvigerina spp.
1208	A	5	H	6	120	122	41.9	41.5015	744.165	3.92327	3.92327	Uvigerina spp.
1208	A	5	H	6	125	127	41.95	41.5492	745.946	4.65892	4.65892	Uvigerina spp.
1208	A	5	H	6	127	129	41.97	41.5683	746.709	4.73656	4.73656	Uvigerina spp.
1208	A	5	H	6	135	137	42.05	41.6447	749.762	4.21619	4.21619	Uvigerina spp.
1208	A	5	H	6	140	142	42.1	41.6924	751.288	4.35649	4.35649	Uvigerina spp.
1208	A	5	H	7	0	4	42.2	41.7878	754.086	4.65732	4.65732	Uvigerina spp.
1208	A	5	H	7	6	8	42.26	41.845	755.176	4.46799	4.46799	Uvigerina spp.
1208	A	5	H	7	7	9	42.27	41.8546	755.358	4.32579	4.32579	Uvigerina spp.
1208	A	5	H	7	22	24	42.42	41.9977	757.901	4.48173	4.48173	Uvigerina spp.
1208	A	5	H	7	30	32	42.5	42.074	758.919	4.78851	4.78851	Uvigerina spp.
1208	A	5	H	7	45	47	42.65	42.2172	766.804	4.2638	4.2638	Uvigerina spp.
1208	A	5	H	7	60	62	42.8	42.3603	773.418	3.4484	3.4484	Uvigerina spp.
1208	A	5	H	7	60	64	42.8	42.3603	773.418	3.52939	3.52939	Uvigerina spp.
1208	A	5	H	7	67	69	42.87	42.4271	775.453	4.01484	4.01484	Uvigerina spp.
1208	A	5	H	7	73	77	42.93	42.4844	776.725	3.58829	3.58829	Uvigerina spp.
1208	A	5	H	cc	2	4	42.99	42.5416	781.049	4.0024	4.0024	Uvigerina spp.
1208	A	5	H	cc	7	9	43.04	42.5893	782.321	4.01155	4.01155	Uvigerina spp.
1208	A	6	H	1	0	4	42.7	42.7	786.137	3.76884	3.76884	Uvigerina spp.
1208	A	6	H	1	7	9	42.77	42.7667	789.189	4.17625	4.17625	Uvigerina spp.
1208	A	6	H	1	15	18	42.85	42.843	790.207	4.13813	4.13813	Uvigerina spp.
1208	A	6	H	1	28	30	42.98	42.9669	792.242	4.25939	4.25939	Uvigerina spp.
1208	A	6	H	1	30	32	43	42.986	792.75	4.13386	4.13386	Uvigerina spp.
1208	A	6	H	1	37	39	43.07	43.0527	794.022	4.68355	4.68355	Uvigerina spp.
1208	A	6	H	1	44	47	43.14	43.1194	795.803	4.56462	4.56462	Uvigerina spp.
1208	A	6	H	1	52	54	43.22	43.1957	797.583	4.75232	4.75232	Uvigerina spp.
1208	A	6	H	1	62	64	43.32	43.291	799.11	4.66236	4.66236	Uvigerina spp.
1208	A	6	H	1	70	72	43.4	43.3673	800.636	4.75016	4.75016	Uvigerina spp.
1208	A	6	H	1	75	77	43.45	43.415	801.399	4.43864	4.43864	Uvigerina spp.
1208	A	6	H	1	82	84	43.52	43.4817	802.671	4.84879	4.84879	Uvigerina spp.
1208	A	6	H	1	90	93	43.6	43.558	803.688	4.69704	4.69704	Uvigerina spp.
1208	A	6	H	1	101	103	43.71	43.6628	805.469	4.56212	4.56212	Uvigerina spp.
1208	A	6	H	1	105	108	43.75	43.701	806.232	4.69684	4.69684	Uvigerina spp.
1208	A	6	H	1	112	114	43.82	43.7677	807.25	4.69408	4.69408	Uvigerina spp.
1208	A	6	H	1	122	124	43.92	43.863	809.285	4.32134	4.32134	Uvigerina spp.
1208	A	6	H	1	127	129	43.97	43.9107	810.048	4.35444	4.35444	Uvigerina spp.
1208	A	6	H	1	127	129	43.97	43.9107	810.048	4.35524	4.35524	Uvigerina spp.
1208	A	6	H	1	135	137	44.05	43.9869	811.32	4.20342	4.20342	Uvigerina spp.
1208	A	6	H	1	142	144	44.12	44.0537	812.337	4.4134	4.4134	Uvigerina spp.
1208	A	6	H	2	0	4	44.2	44.1299	813.609	4.44771	4.44771	Uvigerina spp.
1208	A	6	H	2	7	9	44.27	44.1967	814.881	4.27255	4.27255	Uvigerina spp.
1208	A	6	H	2	15	17	44.35	44.2729	816.153	3.97062	3.97062	Uvigerina spp.
1208	A	6	H	2	15	17	44.35	44.2729	816.153	3.97166	3.97166	Uvigerina spp.
1208	A	6	H	2	18	20	44.38	44.3015	816.407	4.30584	4.30584	Uvigerina spp.
1208	A	6	H	2	29	31	44.49	44.4064	818.442	3.83962	3.83962	Uvigerina spp.
1208	A	6	H	2	37	39	44.57	44.4827	819.714	4.05417	4.05417	Uvigerina spp.
1208	A	6	H	2	47	49	44.67	44.578	821.494	3.76947	3.76947	Uvigerina spp.
1208	A	6	H	2	52	54	44.72	44.6256	822.512	3.97486	3.97486	Uvigerina spp.
1208	A	6	H	2	62	64	44.82	44.721	824.293	3.77612	3.77612	Uvigerina spp.
1208	A	6	H	2	67	69	44.87	44.7686	825.31	4.0431	4.0431	Uvigerina spp.
1208	A	6	H	2	75	77	44.95	44.8449	827.091	3.89459	3.89459	Uvigerina spp.
1208	A	6	H	2	82	84	45.02	44.9116	828.617	4.1664	4.1664	Uvigerina spp.
1208	A	6	H	2	87	89	45.07	44.9593	829.889	4.06457	4.06457	Uvigerina spp.
1208	A	6	H	2	89	91	45.09	44.9784	830.143	4.01718	4.01718	Uvigerina spp.
1208	A	6	H	2	112	114	45.32	45.1976	834.213	4.05239	4.05239	Uvigerina spp.
1208	A	6	H	2	120	124	45.4	45.2739	835.485	3.88579	3.88579	Uvigerina spp.
1208	A	6	H	2	127	129	45.47	45.3406	837.266	3.99878	3.99878	Uvigerina spp.
1208	A	6	H	2	127	129	45.47	45.3406	837.266	4.09113	4.09113	Uvigerina spp.
1208	A	6	H	2	135	137	45.55	45.4169	839.046	3.93558	3.93558	Uvigerina spp.
1208	A	6	H	2	135	137	45.55	45.4169	839.046	3.99898	3.99898	Uvigerina spp.
1208	A	6	H	2	142	144	45.62	45.4836	840.572	3.92755	3.92755	Uvigerina spp.
1208	A	6	H	3	0	4	45.7	45.5599	842.862	3.93438	3.93438	Uvigerina spp.
1208	A	6	H	3	4	6	45.74	45.598	844.134	3.87276	3.87276	Uvigerina spp.
1208	A	6	H	3	4	6	45.74	45.598	844.134	3.99078	3.99078	Uvigerina spp.
1208	A	6	H	3	12	15	45.82	45.6743	846.677	3.67912	3.67912	Uvigerina spp.
1208	A	6	H	3	16	20	45.86	45.7124	848.458	3.64676	3.64676	Uvigerina spp.
1208	A	6	H	3	30	32	46	45.8459	852.528	3.88944	3.88944	Uvigerina spp.
1208	A	6	H	3	38	40	46.08	45.9221	855.58	3.7058	3.7058	Uvigerina spp.
1208	A	6	H	3	45	48	46.15	45.9888	857.615	3.59604	3.59604	Uvigerina spp.
1208	A	6	H	3	52	56	46.22	46.0556	859.396	3.36129	3.36129	Uvigerina spp.
1208	A	6	H	3	52	56	46.22	46.0556	859.396	3.5197	3.5197	Uvigerina spp.
1208	A	6	H	3	60	64	46.3	46.1318	860.922	3.37098	3.37098	Uvigerina spp.
1208	A	6	H	3	60	64	46.3	46.1318	860.922	3.60031	3.60031	Uvigerina spp.
1208	A	6	H	3	66	69	46.36	46.189	862.194	3.49617	3.49617	Uvigerina spp.
1208	A	6	H	3	77	80	46.47	46.2939	864.229	3.63368	3.63368	Uvigerina spp.
1208	A	6	H	3	82	85	46.52	46.3416	865.246	3.91445	3.91445	Uvigerina spp.
1208	A	6	H	3	90	93	46.6	46.4178	866.773	4.11513	4.11513	Uvigerina spp.
1208	A	6	H	3	97	99	46.67	46.4846	867.79	4.24363	4.24363	Uvigerina spp.
1208	A	6	H	3	105	107	46.75	46.5608	869.316	4.5348	4.5348	Uvigerina spp.
1208	A	6	H	3	112	114	46.82	46.6276	870.334	4.62539	4.62539	Uvigerina spp.
1208	A	6	H	3	120	124	46.9	46.7038	871.606	4.65839	4.65839	Uvigerina spp.
1208	A	6	H	3	126	129	46.96	46.761	872.623	4.8044	4.8044	Uvigerina spp.
1208	A	6	H	3	126	129	46.96	46.761	872.623	4.81991	4.81991	Uvigerina spp.
1208	A	6	H	3	136	140	47.06	46.8563	875.167	4.63635	4.63635	Uvigerina spp.
1208	A	6	H	3	142	144	47.12	46.9135	876.184	4.82958	4.82958	Uvigerina spp.
1208	A	6	H	4	0	4	47.2	46.9898	877.711	4.7174	4.7174	Uvigerina spp.
1208	A	6	H	4	7	9	47.27	47.0565	878.983	4.72652	4.72652	Uvigerina spp.
1208	A	6	H	4	15	17	47.35	47.1328	880.254	4.84871	4.84871	Uvigerina spp.
1208	A	6	H	4	22	24	47.42	47.1995	881.272	3.98311	3.98311	Uvigerina spp.
1208	A	6	H	4	22	24	47.42	47.1995	881.272	4.05347	4.05347	Uvigerina spp.
1208	A	6	H	4	22	24	47.42	47.1995	881.272	4.23058	4.23058	Uvigerina spp.
1208	A	6	H	4	30	32	47.5	47.2758	882.289	4.85636	4.85636	Uvigerina spp.
1208	A	6	H	4	37	39	47.57	47.3425	883.307	4.83732	4.83732	Uvigerina spp.
1208	A	6	H	4	45	49	47.65	47.4188	884.324	4.60197	4.60197	Uvigerina spp.
1208	A	6	H	4	52	54	47.72	47.4855	885.342	4.80134	4.80134	Uvigerina spp.
1208	A	6	H	4	60	63	47.8	47.5618	886.105	4.60189	4.60189	Uvigerina spp.
1208	A	6	H	4	67	69	47.87	47.6285	887.377	4.58813	4.58813	Uvigerina spp.
1208	A	6	H	4	75	77	47.95	47.7048	888.394	4.60002	4.60002	Uvigerina spp.
1208	A	6	H	4	81	84	48.01	47.762	889.157	4.66322	4.66322	Uvigerina spp.
1208	A	6	H	4	90	93	48.1	47.8478	890.429	4.56457	4.56457	Uvigerina spp.
1208	A	6	H	4	96	99	48.16	47.905	891.192	4.69284	4.69284	Uvigerina spp.
1208	A	6	H	4	106	109	48.26	48.0003	892.719	4.46503	4.46503	Uvigerina spp.
1208	A	6	H	4	112	114	48.32	48.0575	893.736	4.58334	4.58334	Uvigerina spp.
1208	A	6	H	4	120	124	48.4	48.1337	894.754	4.596	4.596	Uvigerina spp.
1208	A	6	H	4	127	129	48.47	48.2005	895.771	4.48352	4.48352	Uvigerina spp.
1208	A	6	H	4	135	137	48.55	48.2767	896.789	4.5062	4.5062	Uvigerina spp.
1208	A	6	H	4	141	144	48.61	48.3339	897.806	4.59182	4.59182	Uvigerina spp.
1208	A	6	H	4	141	144	48.61	48.3339	897.806	4.60322	4.60322	Uvigerina spp.
1208	A	6	H	5	0	4	48.7	48.4197	899.332	4.57286	4.57286	Uvigerina spp.
1208	A	6	H	5	7	9	48.77	48.4865	900.35	4.42789	4.42789	Uvigerina spp.
1208	A	6	H	5	17	20	48.87	48.5818	902.13	4.35267	4.35267	Uvigerina spp.
1208	A	6	H	5	22	25	48.92	48.6295	903.148	4.27468	4.27468	Uvigerina spp.
1208	A	6	H	5	30	32	49	48.7057	904.674	4.14654	4.14654	Uvigerina spp.
1208	A	6	H	5	30	32	49	48.7057	904.674	4.19777	4.19777	Uvigerina spp.
1208	A	6	H	5	37	39	49.07	48.7724	905.946	4.1637	4.1637	Uvigerina spp.
1208	A	6	H	5	45	48	49.15	48.8487	907.472	4.09787	4.09787	Uvigerina spp.
1208	A	6	H	5	52	54	49.22	48.9154	908.998	4.1531	4.1531	Uvigerina spp.
1208	A	6	H	5	60	63	49.3	48.9917	910.525	4.15264	4.15264	Uvigerina spp.
1208	A	6	H	5	67	69	49.37	49.0584	912.051	4.07294	4.07294	Uvigerina spp.
1208	A	6	H	5	73	77	49.43	49.1156	913.323	4.22891	4.22891	Uvigerina spp.
1208	A	6	H	5	82	84	49.52	49.2014	915.358	4.11943	4.11943	Uvigerina spp.
1208	A	6	H	5	82	84	49.52	49.2014	915.358	4.32966	4.32966	Uvigerina spp.
1208	A	6	H	5	90	93	49.6	49.2777	917.138	4.49864	4.49864	Uvigerina spp.
1208	A	6	H	5	97	99	49.67	49.3444	918.156	4.78092	4.78092	Uvigerina spp.
1208	A	6	H	5	105	107	49.75	49.4207	919.682	4.56821	4.56821	Uvigerina spp.
1208	A	6	H	5	112	114	49.82	49.4874	920.7	4.69414	4.69414	Uvigerina spp.
1208	A	6	H	5	120	124	49.9	49.5637	921.971	4.54731	4.54731	Uvigerina spp.
1208	A	6	H	5	127	129	49.97	49.6304	922.989	4.54308	4.54308	Uvigerina spp.
1208	A	6	H	5	137	139	50.07	49.7257	924.515	4.39298	4.39298	Uvigerina spp.
1208	A	6	H	5	142	144	50.12	49.7734	925.278	4.41801	4.41801	Uvigerina spp.
1208	A	6	H	5	142	144	50.12	49.7734	925.278	4.50387	4.50387	Uvigerina spp.
1208	A	6	H	6	0	4	50.2	49.8497	926.55	4.20309	4.20309	Uvigerina spp.
1208	A	6	H	6	8	10	50.28	49.9259	927.822	4.2362	4.2362	Uvigerina spp.
1208	A	6	H	6	15	17	50.35	49.9927	929.094	4.00857	4.00857	Uvigerina spp.
1208	A	6	H	6	22	24	50.42	50.0594	930.366	4.7463	4.7463	Uvigerina spp.
1208	A	6	H	6	22	24	50.42	50.0594	930.366	4.80372	4.80372	Uvigerina spp.
1208	A	6	H	6	29	31	50.49	50.1261	931.638	4.01709	4.01709	Uvigerina spp.
1208	A	6	H	6	37	40	50.57	50.2024	933.164	4.05889	4.05889	Uvigerina spp.
1208	A	6	H	6	45	49	50.65	50.2786	934.944	3.57882	3.57882	Uvigerina spp.
1208	A	6	H	6	52	54	50.72	50.3454	936.979	3.77405	3.77405	Uvigerina spp.
1208	A	6	H	6	60	63	50.8	50.4216	938.506	3.74377	3.74377	Uvigerina spp.
1208	A	6	H	6	67	69	50.87	50.4884	940.032	3.88585	3.88585	Uvigerina spp.
1208	A	6	H	6	75	77	50.95	50.5646	941.304	3.71537	3.71537	Uvigerina spp.
1208	A	6	H	6	82	85	51.02	50.6314	942.83	3.7711	3.7711	Uvigerina spp.
1208	A	6	H	6	82	85	51.02	50.6314	942.83	3.77941	3.77941	Uvigerina spp.
1208	A	6	H	6	90	93	51.1	50.7076	944.865	3.63579	3.63579	Uvigerina spp.
1208	A	6	H	6	97	100	51.17	50.7744	946.9	3.55029	3.55029	Uvigerina spp.
1208	A	6	H	6	105	109	51.25	50.8506	948.935	3.39235	3.39235	Uvigerina spp.
1208	A	6	H	6	105	109	51.25	50.8506	948.935	3.57447	3.57447	Uvigerina spp.
1208	A	6	H	6	112	114	51.32	50.9173	950.97	3.3352	3.3352	Uvigerina spp.
1208	A	6	H	6	120	124	51.4	50.9936	952.496	3.31982	3.31982	Uvigerina spp.
1208	A	6	H	6	127	130	51.47	51.0603	954.277	3.8402	3.8402	Uvigerina spp.
1208	A	6	H	6	135	137	51.55	51.1366	956.057	3.27426	3.27426	Uvigerina spp.
1208	A	6	H	6	142	144	51.62	51.2033	957.075	3.95481	3.95481	Uvigerina spp.
1208	A	6	H	7	0	4	51.7	51.2796	958.347	3.54839	3.54839	Uvigerina spp.
1208	A	6	H	7	7	9	51.77	51.3463	959.364	3.58976	3.58976	Uvigerina spp.
1208	A	6	H	7	15	18	51.85	51.4226	960.636	4.00251	4.00251	Uvigerina spp.
1208	A	6	H	7	21	24	51.91	51.4798	961.653	3.82791	3.82791	Uvigerina spp.
1208	A	6	H	7	26	28	51.96	51.5275	962.417	4.47597	4.47597	Uvigerina spp.
1208	A	6	H	7	30	33	52	51.5656	963.688	4.44768	4.44768	Uvigerina spp.
1208	A	6	H	7	30	33	52	51.5656	963.688	4.5591	4.5591	Uvigerina spp.
1208	A	6	H	7	37	39	52.07	51.6323	964.96	4.58066	4.58066	Uvigerina spp.
1208	A	6	H	7	41	43	52.11	51.6704	965.723	4.51062	4.51062	Uvigerina spp.
1208	A	6	H	7	46	48	52.16	51.7181	967.25	4.68687	4.68687	Uvigerina spp.
1208	A	6	H	7	51	53	52.21	51.7658	968.776	4.34984	4.34984	Uvigerina spp.
1208	A	6	H	7	58	60	52.28	51.8325	970.556	4.18165	4.18165	Uvigerina spp.
1208	A	6	H	7	60	64	52.3	51.8516	971.32	4.18779	4.18779	Uvigerina spp.
1208	A	6	H	cc	2	4	52.38	51.9278	974.372	3.96604	3.96604	Uvigerina spp.
1208	A	6	H	cc	7	9	52.43	51.9755	976.916	3.82463	3.82463	Uvigerina spp.
1208	A	6	H	cc	15	17	52.51	52.0518	979.459	3.80936	3.80936	Uvigerina spp.
1208	A	6	H	cc	22	24	52.58	52.1185	982.512	4.09127	4.09127	Uvigerina spp.
1208	A	7	H	1	0	2	52.2	52.2	985.056	3.82404	3.82404	Uvigerina spp.
1208	A	7	H	1	0	4	52.2	52.2	985.056	3.98813	3.98813	Uvigerina spp.
1208	A	7	H	1	10	12	52.3	52.295	990.906	3.96098	3.96098	Uvigerina spp.
1208	A	7	H	1	15	18	52.35	52.3425	992.687	3.61275	3.61275	Uvigerina spp.
1208	A	7	H	1	15	18	52.35	52.3425	992.687	4.12859	4.12859	Uvigerina spp.
1208	A	7	H	1	20	22	52.4	52.3899	994.976	3.86475	3.86475	Uvigerina spp.
1208	A	7	H	1	30	32	52.5	52.4849	997.774	4.05028	4.05028	Uvigerina spp.
1208	A	7	H	1	40	42	52.6	52.5799	1000.83	4.00816	4.00816	Uvigerina spp.
1208	A	7	H	1	47	49	52.67	52.6463	1004.64	4.28085	4.28085	Uvigerina spp.
1208	A	7	H	1	60	62	52.8	52.7698	1010.75	3.82383	3.82383	Uvigerina spp.
1208	A	7	H	1	80	82	53	52.9597	1015.58	3.42583	3.42583	Uvigerina spp.
1208	A	7	H	1	120	122	53.4	53.3396	1020.16	3.83469	3.83469	Uvigerina spp.
1208	A	7	H	1	140	142	53.6	53.5295	1022.96	3.51116	3.51116	Uvigerina spp.
1208	A	7	H	2	0	2	53.7	53.6245	1024.23	3.92494	3.92494	Uvigerina spp.
1208	A	7	H	2	20	22	53.9	53.8144	1027.28	3.73043	3.73043	Uvigerina spp.
1208	A	7	H	2	40	42	54.1	54.0044	1030.08	3.79541	3.79541	Uvigerina spp.
1208	A	7	H	2	60	62	54.3	54.1943	1033.39	4.18673	4.18673	Uvigerina spp.
1208	A	7	H	2	67	69	54.37	54.2608	1035.42	4.50988	4.50988	Uvigerina spp.
1208	A	7	H	2	67	69	54.37	54.2608	1035.42	4.57252	4.57252	Uvigerina spp.
1208	A	7	H	2	70	72	54.4	54.2893	1036.69	4.34225	4.34225	Uvigerina spp.
1208	A	7	H	2	75	77	54.45	54.3368	1038.47	4.55599	4.55599	Uvigerina spp.
1208	A	7	H	2	84	86	54.54	54.4222	1041.53	4.35303	4.35303	Uvigerina spp.
1208	A	7	H	2	90	92	54.6	54.4792	1043.82	4.47111	4.47111	Uvigerina spp.
1208	A	7	H	2	96	98	54.66	54.5362	1045.85	4.48167	4.48167	Uvigerina spp.
1208	A	7	H	2	96	98	54.66	54.5362	1045.85	4.57899	4.57899	Uvigerina spp.
1208	A	7	H	2	100	102	54.7	54.5742	1046.87	4.27679	4.27679	Uvigerina spp.
1208	A	7	H	2	120	122	54.9	54.7641	1052.21	4.43154	4.43154	Uvigerina spp.
1208	A	7	H	2	140	142	55.1	54.954	1057.04	4.11134	4.11134	Uvigerina spp.
1208	A	7	H	3	0	2	55.2	55.049	1059.08	4.0693	4.0693	Uvigerina spp.
1208	A	7	H	3	10	12	55.3	55.144	1061.11	3.78595	3.78595	Uvigerina spp.
1208	A	7	H	3	60	62	55.8	55.6188	1068.24	3.20495	3.20495	Uvigerina spp.
1208	A	7	H	3	80	82	56	55.8087	1071.29	3.04591	3.04591	Uvigerina spp.
1208	A	7	H	3	100	102	56.2	55.9987	1074.59	3.2713	3.2713	Uvigerina spp.
1208	A	7	H	3	120	122	56.4	56.1886	1077.65	3.49317	3.49317	Uvigerina spp.
1208	A	7	H	3	140	142	56.6	56.3785	1081.46	3.6599	3.6599	Uvigerina spp.
1208	A	7	H	4	10	12	56.8	56.5685	1085.28	3.87146	3.87146	Uvigerina spp.
1208	A	7	H	4	20	22	56.9	56.6634	1086.8	4.01766	4.01766	Uvigerina spp.
1208	A	7	H	4	40	42	57.1	56.8534	1090.11	4.29515	4.29515	Uvigerina spp.
1208	A	7	H	4	80	82	57.5	57.2332	1096.47	3.82852	3.82852	Uvigerina spp.
1208	A	7	H	4	100	102	57.7	57.4232	1102.32	4.19591	4.19591	Uvigerina spp.
1208	A	7	H	4	120	122	57.9	57.6131	1107.15	3.53562	3.53562	Uvigerina spp.
1208	A	7	H	4	140	142	58.1	57.803	1110.97	3.46663	3.46663	Uvigerina spp.
1208	A	7	H	5	0	2	58.2	57.898	1116.06	4.298	4.298	Uvigerina spp.
1208	A	7	H	5	40	42	58.6	58.2779	1123.94	4.03	4.67	Cib wullerstorfi
1208	A	7	H	5	60	62	58.8	58.4678	1127.25	3.8011	4.4411	Cib wullerstorfi
1208	A	7	H	5	80	82	59	58.6577	1130.3	4.36748	4.36748	Uvigerina spp.
1208	A	7	H	5	100	102	59.2	58.8477	1133.1	4.09743	4.09743	Uvigerina spp.
1208	A	7	H	5	120	122	59.4	59.0376	1136.41	4.46643	4.46643	Uvigerina spp.
1208	A	7	H	5	140	142	59.6	59.2275	1139.97	3.12249	3.76249	Cib wullerstorfi
1208	A	7	H	6	0	2	59.7	59.3225	1142	3.98269	3.98269	Uvigerina spp.
1208	A	7	H	6	10	12	59.8	59.4175	1144.8	3.44472	4.08472	Cib wullerstorfi
1208	A	7	H	6	20	22	59.9	59.5124	1147.34	3.93851	3.93851	Uvigerina spp.
1208	A	7	H	6	40	42	60.1	59.7024	1154.21	3.78598	3.78598	Uvigerina spp.
1208	A	7	H	6	60	62	60.3	59.8923	1162.1	3.57213	3.57213	Uvigerina spp.
1208	A	7	H	6	80	82	60.5	60.0822	1168.71	3.79673	3.79673	Uvigerina spp.
1208	A	7	H	6	100	102	60.7	60.2722	1174.05	3.81293	3.81293	Uvigerina spp.
1208	A	7	H	6	100	102	60.7	60.2722	1174.05	3.86352	3.86352	Uvigerina spp.
1208	A	7	H	6	120	122	60.9	60.4621	1178.89	3.69433	3.69433	Uvigerina spp.
1208	A	7	H	6	140	142	61.1	60.652	1184.99	3.88529	3.88529	Uvigerina spp.
1208	A	7	H	7	0	2	61.2	60.747	1189.06	3.94577	3.94577	Uvigerina spp.
1208	A	7	H	7	10	12	61.3	60.842	1191.61	4.06307	4.06307	Uvigerina spp.
1208	A	7	H	7	10	12	61.3	60.842	1191.61	4.37272	4.37272	Uvigerina spp.
1208	A	7	H	7	20	22	61.4	60.9369	1194.91	4.45799	4.45799	Uvigerina spp.
1208	A	7	H	7	40	42	61.6	61.1269	1201.27	4.35813	4.35813	Uvigerina spp.
1208	A	7	H	7	60	62	61.8	61.3168	1206.36	4.38114	4.38114	Uvigerina spp.
1208	A	7	H	cc	8	10	61.94	61.4498	1210.43	4.52818	4.52818	Uvigerina spp.
1208	A	7	H	cc	18	20	62.04	61.5447	1215.52	4.4552	4.4552	Uvigerina spp.
1208	A	7	H	cc	26	28	62.12	61.6207	1220.1	4.30472	4.30472	Uvigerina spp.
1208	A	8	H	1	0	2	61.7	61.7	1225.95	3.30626	3.30626	Uvigerina spp.
1208	A	8	H	1	8	10	61.78	61.7764	1229.25	3.49543	3.49543	Uvigerina spp.
1208	A	8	H	1	20	22	61.9	61.891	1233.07	3.58771	3.58771	Uvigerina spp.
1208	A	8	H	1	20	22	61.9	61.891	1233.07	3.65362	3.65362	Uvigerina spp.
1208	A	8	H	1	40	42	62.1	62.082	1242.99	4.1849	4.1849	Uvigerina spp.
1208	A	8	H	1	60	62	62.3	62.2731	1248.08	4.49108	4.49108	Uvigerina spp.
1208	A	8	H	1	80	82	62.5	62.4641	1252.66	4.5033	4.5033	Uvigerina spp.
1208	A	8	H	1	100	102	62.7	62.6551	1255.96	4.4875	4.4875	Uvigerina spp.
1208	A	8	H	2	0	2	63.2	63.1327	1264.86	4.03356	4.03356	Uvigerina spp.
1208	A	8	H	2	9	11	63.29	63.2186	1266.39	4.14853	4.14853	Uvigerina spp.
1208	A	8	H	2	20	22	63.4	63.3237	1268.68	3.77381	3.77381	Uvigerina spp.
1208	A	8	H	2	40	42	63.6	63.5147	1272.24	3.48974	3.48974	Uvigerina spp.
1208	A	8	H	2	60	62	63.8	63.7057	1276.31	3.68004	3.68004	Uvigerina spp.
1208	A	8	H	2	80	82	64	63.8968	1280.13	3.65134	3.65134	Uvigerina spp.
1208	A	8	H	2	100	102	64.2	64.0878	1283.94	3.96973	3.96973	Uvigerina spp.
1208	A	8	H	2	120	122	64.4	64.2788	1287.76	4.47955	4.47955	Uvigerina spp.
1208	A	8	H	2	140	142	64.6	64.4698	1290.56	4.38451	4.38451	Uvigerina spp.
1208	A	8	H	3	0	2	64.7	64.5653	1292.34	4.21201	4.21201	Uvigerina spp.
1208	A	8	H	3	9	11	64.79	64.6513	1293.86	4.30805	4.30805	Uvigerina spp.
1208	A	8	H	3	20	22	64.9	64.7564	1295.9	4.38316	4.38316	Uvigerina spp.
1208	A	8	H	3	40	42	65.1	64.9474	1300.22	4.32573	4.32573	Uvigerina spp.
1208	A	8	H	3	60	62	65.3	65.1384	1305.06	3.94896	3.94896	Uvigerina spp.
1208	A	8	H	3	80	82	65.5	65.3294	1310.14	3.8142	3.8142	Uvigerina spp.
1208	A	8	H	3	100	102	65.7	65.5204	1317.27	3.86542	3.86542	Uvigerina spp.
1208	A	8	H	3	120	122	65.9	65.7115	1322.86	4.00611	4.00611	Uvigerina spp.
1208	A	8	H	3	140	142	66.1	65.9025	1328.46	4.24728	4.24728	Uvigerina spp.
1208	A	8	H	4	0	2	66.2	65.998	1331	4.29059	4.29059	Uvigerina spp.
1208	A	8	H	4	11	13	66.31	66.1031	1333.8	4.31638	4.31638	Uvigerina spp.
1208	A	8	H	4	20	22	66.4	66.189	1335.83	4.3714	4.3714	Uvigerina spp.
1208	A	8	H	4	40	42	66.6	66.38	1339.4	4.36703	4.36703	Uvigerina spp.
1208	A	8	H	4	60	62	66.8	66.5711	1343.47	3.98043	3.98043	Uvigerina spp.
1208	A	8	H	4	80	82	67	66.7621	1347.54	3.62931	3.62931	Uvigerina spp.
1208	A	8	H	4	100	102	67.2	66.9531	1351.35	3.33658	3.33658	Uvigerina spp.
1208	A	8	H	4	100	102	67.2	66.9531	1351.35	3.41471	3.41471	Uvigerina spp.
1208	A	8	H	4	120	122	67.4	67.1441	1355.68	3.35515	3.35515	Uvigerina spp.
1208	A	8	H	4	140	142	67.6	67.3351	1360	3.67002	3.67002	Uvigerina spp.
1208	A	8	H	5	0	2	67.7	67.4307	1362.29	3.80075	3.80075	Uvigerina spp.
1208	A	8	H	5	10	12	67.8	67.5262	1365.09	4.06654	4.06654	Uvigerina spp.
1208	A	8	H	5	20	22	67.9	67.6217	1367.63	4.23738	4.23738	Uvigerina spp.
1208	A	8	H	5	20	22	67.9	67.6217	1367.63	4.24133	4.24133	Uvigerina spp.
1208	A	8	H	5	40	42	68.1	67.8127	1371.7	4.25709	4.25709	Uvigerina spp.
1208	A	8	H	5	60	62	68.3	68.0037	1375.26	4.26089	4.26089	Uvigerina spp.
1208	A	8	H	5	80	82	68.5	68.1947	1379.33	4.22503	4.22503	Uvigerina spp.
1208	A	8	H	5	100	102	68.7	68.3858	1383.66	3.928	3.928	Uvigerina spp.
1208	A	8	H	5	120	122	68.9	68.5768	1388.24	4.07832	4.07832	Uvigerina spp.
1208	A	8	H	5	140	142	69.1	68.7678	1393.32	3.76591	3.76591	Uvigerina spp.
1208	A	8	H	6	0	2	69.2	68.8633	1396.38	3.51467	3.51467	Uvigerina spp.
1208	A	8	H	6	20	22	69.4	69.0543	1402.73	4.04466	4.04466	Uvigerina spp.
1208	A	8	H	6	40	42	69.6	69.2454	1406.8	4.05484	4.05484	Uvigerina spp.
1208	A	8	H	6	60	62	69.8	69.4364	1410.37	4.32166	4.32166	Uvigerina spp.
1208	A	8	H	6	100	102	70.2	69.8184	1416.98	3.91559	3.91559	Uvigerina spp.
1208	A	8	H	6	120	122	70.4	70.0095	1420.03	4.14993	4.14993	Uvigerina spp.
1208	A	8	H	6	140	142	70.6	70.2005	1423.34	3.89375	3.89375	Uvigerina spp.
1208	A	8	H	7	0	2	70.7	70.296	1424.86	4.03212	4.03212	Uvigerina spp.
1208	A	8	H	7	40	42	71.1	70.678	1432.75	3.44898	3.44898	Uvigerina spp.
1208	A	8	H	7	60	62	71.3	70.8691	1437.33	3.54426	3.54426	Uvigerina spp.
1208	A	8	H	cc	6	8	71.5	71.0601	1442.93	3.56453	3.56453	Uvigerina spp.
1208	A	8	H	cc	14	16	71.58	71.1365	1445.47	3.69343	3.69343	Uvigerina spp.
1208	A	9	H	1	0	2	71.2	71.2	1447	3.63427	3.63427	Uvigerina spp.
1208	A	9	H	1	10	12	71.3	71.2956	1449.28	3.31635	3.31635	Uvigerina spp.
1208	A	9	H	1	20	22	71.4	71.3912	1450.81	3.6306	3.6306	Uvigerina spp.
1208	A	9	H	1	40	42	71.6	71.5824	1453.86	4.355	4.355	Uvigerina spp.
1208	A	9	H	1	60	62	71.8	71.7736	1456.92	4.56065	4.56065	Uvigerina spp.
1208	A	9	H	1	80	82	72	71.9648	1460.48	4.51853	4.51853	Uvigerina spp.
1208	A	9	H	1	100	102	72.2	72.156	1469.13	4.3092	4.9492	Cib wullerstorfi
1208	A	9	H	1	140	142	72.6	72.5384	1474.98	3.07676	3.71676	Cib wullerstorfi
1208	A	9	H	2	0	2	72.7	72.634	1476.76	2.98125	3.62125	Cib wullerstorfi
1208	A	9	H	2	9	11	72.79	72.7201	1478.54	3.59659	3.59659	Uvigerina spp.
1208	A	9	H	2	20	22	72.9	72.8252	1480.57	3.5523	3.5523	Uvigerina spp.
1208	A	9	H	2	40	42	73.1	73.0164	1484.64	3.365	3.365	Uvigerina spp.
1208	A	9	H	2	60	62	73.3	73.2076	1488.2	3.56386	3.56386	Uvigerina spp.
1208	A	9	H	2	80	82	73.5	73.3989	1492.02	3.70149	3.70149	Uvigerina spp.
1208	A	9	H	2	100	102	73.7	73.5901	1495.33	3.80244	4.44244	Cib wullerstorfi
1208	A	9	H	3	10	12	74.3	74.1637	1504.99	3.904	4.544	Cib wullerstorfi
1208	A	9	H	3	40	42	74.6	74.4505	1511.35	3.35602	3.99602	Cib wullerstorfi
1208	A	9	H	3	60	62	74.8	74.6417	1516.18	3.26311	3.90311	Cib wullerstorfi
1208	A	9	H	3	80	82	75	74.8329	1520.51	3.633	3.633	Uvigerina spp.
1208	A	9	H	3	100	102	75.2	75.0241	1524.83	4.04399	4.04399	Uvigerina spp.
1208	A	9	H	3	100	102	75.2	75.0241	1524.83	4.1123	4.1123	Uvigerina spp.
1208	A	9	H	3	120	122	75.4	75.2153	1528.39	4.12282	4.12282	Uvigerina spp.
1208	A	9	H	3	140	142	75.6	75.4065	1531.7	4.52976	4.52976	Uvigerina spp.
1208	A	9	H	4	0	2	75.7	75.5021	1533.23	4.54942	4.54942	Uvigerina spp.
1208	A	9	H	4	10	12	75.8	75.5977	1535.01	4.59891	4.59891	Uvigerina spp.
1208	A	9	H	4	20	22	75.9	75.6933	1536.53	4.53169	4.53169	Uvigerina spp.
1208	A	9	H	4	40	42	76.1	75.8845	1539.59	4.5745	4.5745	Uvigerina spp.
1208	A	9	H	4	80	82	76.5	76.2669	1545.44	4.21896	4.21896	Uvigerina spp.
1208	A	9	H	4	100	102	76.7	76.4581	1548.49	4.05866	4.05866	Uvigerina spp.
1208	A	9	H	4	120	122	76.9	76.6493	1552.56	3.91936	3.91936	Uvigerina spp.
1208	A	9	H	4	140	142	77.1	76.8405	1557.65	3.951	3.951	Uvigerina spp.
1208	A	9	H	5	0	2	77.2	76.9361	1560.19	3.877	3.877	Uvigerina spp.
1208	A	9	H	5	10	12	77.3	77.0317	1562.73	2.98325	3.62325	Cib wullerstorfi
1208	A	9	H	5	40	42	77.6	77.3185	1568.84	3.23969	3.87969	Cib wullerstorfi
1208	A	9	H	5	60	62	77.8	77.5098	1572.91	3.52011	4.16011	Cib wullerstorfi
1208	A	9	H	5	80	82	78	77.701	1576.47	3.62575	4.26575	Cib wullerstorfi
1208	A	9	H	5	120	122	78.4	78.0834	1583.34	4.07776	4.07776	Uvigerina spp.
1208	A	9	H	5	140	142	78.6	78.2746	1586.65	3.88101	3.88101	Uvigerina spp.
1208	A	9	H	6	0	2	78.7	78.3702	1588.68	3.95171	3.95171	Uvigerina spp.
1208	A	9	H	6	0	2	78.7	78.3702	1588.68	3.96086	3.96086	Uvigerina spp.
1208	A	9	H	6	10	12	78.8	78.4658	1590.97	3.88235	3.88235	Uvigerina spp.
1208	A	9	H	6	20	22	78.9	78.5614	1593.77	3.914	3.914	Uvigerina spp.
1208	A	9	H	6	40	42	79.1	78.7526	1598.35	3.72288	3.72288	Uvigerina spp.
1208	A	9	H	6	60	62	79.3	78.9438	1603.18	3.57758	3.57758	Uvigerina spp.
1208	A	9	H	6	80	82	79.5	79.135	1608.52	3.80446	3.80446	Uvigerina spp.
1208	A	9	H	6	120	122	79.9	79.5174	1619.46	3.12263	3.76263	Cib wullerstorfi
1208	A	9	H	7	0	2	80.2	79.8042	1627.09	3.35602	3.99602	Cib wullerstorfi
1208	A	9	H	7	10	12	80.3	79.8998	1629.89	3.257	3.897	Cib wullerstorfi
1208	A	9	H	7	20	22	80.4	79.9954	1633.45	3.02519	3.66519	Cib wullerstorfi
1208	A	9	H	7	40	42	80.6	80.1866	1639.81	3.10323	3.74323	Cib wullerstorfi
1208	A	9	H	7	60	62	80.8	80.3778	1646.42	4.045	4.045	Uvigerina spp.
1208	A	9	H	cc	7	9	80.91	80.483	1650.49	4.355	4.355	Uvigerina spp.
1208	A	9	H	cc	17	19	81.01	80.5786	1654.05	4.45763	4.45763	Uvigerina spp.
1208	A	9	H	cc	22	24	81.06	80.6264	1655.58	4.3021	4.3021	Uvigerina spp.
1208	A	10	H	1	0	2	80.7	80.7	1657.87	4.21807	4.21807	Uvigerina spp.
1208	A	10	H	1	10	12	80.8	80.7953	1660.67	4.16913	4.16913	Uvigerina spp.
1208	A	10	H	1	20	22	80.9	80.8907	1663.21	3.389	4.029	Cib wullerstorfi
1208	A	10	H	1	40	42	81.1	81.0813	1667.03	3.992	3.992	Uvigerina spp.
1208	A	10	H	1	60	62	81.3	81.272	1670.33	4.06358	4.06358	Uvigerina spp.
1208	A	10	H	1	80	82	81.5	81.4626	1673.13	3.12222	3.76222	Cib wullerstorfi
1208	A	10	H	1	100	102	81.7	81.6533	1675.93	3.20863	3.84863	Cib wullerstorfi
1208	A	10	H	1	120	122	81.9	81.8439	1679.24	4.212	4.212	Uvigerina spp.
1208	A	10	H	2	0	2	82.2	82.1299	1686.36	3.709	4.349	Cib wullerstorfi
1208	A	10	H	2	10	12	82.3	82.2253	1687.63	3.20064	3.84064	Cib wullerstorfi
1208	A	10	H	2	40	42	82.6	82.5112	1690.68	3.79154	3.79154	Uvigerina spp.
1208	A	10	H	2	80	82	83	82.8926	1695.01	3.32702	3.96702	Cib wullerstorfi
1208	A	10	H	2	100	102	83.2	83.0832	1697.81	4.19347	4.19347	Uvigerina spp.
1208	A	10	H	2	120	122	83.4	83.2739	1700.6	3.47978	3.47978	Uvigerina spp.
1208	A	10	H	2	140	142	83.6	83.4645	1704.17	4.22839	4.22839	Uvigerina spp.
1208	A	10	H	2	140	142	83.6	83.4645	1704.17	4.28411	4.28411	Uvigerina spp.
1208	A	10	H	3	0	2	83.7	83.5599	1705.69	3.678	4.318	Cib wullerstorfi
1208	A	10	H	3	10	12	83.8	83.6552	1707.98	3.462	4.102	Cib wullerstorfi
1208	A	10	H	3	20	22	83.9	83.7505	1709.51	3.986	3.986	Uvigerina spp.
1208	A	10	H	3	40	42	84.1	83.9412	1712.81	3.13	3.77	Cib wullerstorfi
1208	A	10	H	3	60	62	84.3	84.1318	1715.87	3.187	3.827	Cib wullerstorfi
1208	A	10	H	3	80	82	84.5	84.3225	1719.17	2.972	3.612	Cib wullerstorfi
1208	A	10	H	3	100	102	84.7	84.5132	1722.48	3.02	3.66	Cib wullerstorfi
1208	A	10	H	3	120	122	84.9	84.7038	1726.04	3.195	3.835	Cib wullerstorfi
1208	A	10	H	3	140	142	85.1	84.8945	1729.6	3.204	3.844	Cib wullerstorfi
1208	A	10	H	4	0	2	85.2	84.9898	1732.66	3.315	3.955	Cib wullerstorfi
1208	A	10	H	4	10	12	85.3	85.0851	1736.72	3.404	4.044	Cib wullerstorfi
1208	A	10	H	4	20	22	85.4	85.1805	1739.01	3.38	4.02	Cib wullerstorfi
1208	A	10	H	4	40	42	85.6	85.3711	1742.58	3.729	4.369	Cib wullerstorfi
1208	A	10	H	4	60	62	85.8	85.5618	1745.88	3.712	4.352	Cib wullerstorfi
1208	A	10	H	4	80	82	86	85.7524	1749.44	3.659	4.299	Cib wullerstorfi
1208	A	10	H	4	120	122	86.4	86.1337	1756.06	3.666	3.666	Uvigerina spp.
1208	A	10	H	4	140	142	86.6	86.3244	1760.38	3.758	3.758	Uvigerina spp.

## Sheet: Mg-Ca ODP 1208
Site	Hole	Core	Type	Section	Interval-top	Interval-bottom	mbsf	unique ("recompressed") depth (m)	Age HMM Stack	[Ca43]	MgCa	AlCa	MnCa	FeCa
1208	A	3	H	6	4	6	21.74	21.6067	334.229	62.5099	1.03873	-0.0255956	120.472	27.7783
1208	A	3	H	6	14	16	21.84	21.7049	336.53	104.16	0.85754	0.465188	101.843	7.90982
1208	A	3	H	6	24	26	21.94	21.8031	338.413	52.2573	0.932409	1.48959	150.917	-2.49805
1208	A	3	H	6	34	36	22.04	21.9014	340.505	47.1777	0.810718	12.1019	138.775	-1.50213
1208	A	3	H	6	43	45	22.13	21.9898	342.806	76.12	0.806299	9.05798	111.691	4.1595
1208	A	3	H	6	64	66	22.34	22.1961	346.989	73.4257	0.898491	6.26745	108.398	3.11129
1208	A	3	H	6	73	75	22.43	22.2845	348.244	62.1596	0.811161	0.633147	99.9653	18.0906
1208	A	3	H	6	84	86	22.54	22.3925	350.546	53.1441	0.790818	5.33064	108.025	28.2754
1208	A	3	H	6	104	106	22.74	22.589	353.893	65.7348	0.827123	7.60932	142.11	7.49017
1208	A	3	H	6	114	116	22.84	22.6872	355.775	77.4631	0.817089	7.68464	132.601	4.47305
1208	A	3	H	6	124	126	22.94	22.7855	357.449	78.5982	0.78245	0.366993	108.81	-0.956834
1208	A	3	H	6	143	145	23.13	22.9721	360.377	74.6232	0.891987	1.05137	158.743	27.1921
1208	A	3	H	7	4	6	23.24	23.0802	362.051	71.7189	0.795129	2.49659	141.715	-1.9368
1208	A	3	H	7	14	16	23.34	23.1784	363.306	103.872	0.769465	8.22437	129.567	7.1534
1208	A	3	H	7	24	26	23.44	23.2766	364.979	89.2325	0.896353	2.70686	136.458	5.53822
1208	A	3	H	7	33	35	23.53	23.365	366.653	75.0952	0.88034	2.75449	170.744	3.73207
1208	A	3	H	7	42	44	23.62	23.4534	367.699	58.6631	0.834006	3.7486	195.982	4.34595
1208	A	3	H	CC	16	18	23.8	23.6303	370	85.8084	0.915991	6.40203	178.707	9.61338
1208	A	4	H	1	0	2	23.7	23.7	400.763	75.1603	1.04394	3.35846	162.931	25.7507
1208	A	4	H	1	10	12	23.8	23.7967	406.359	20.1079	1.0953	24.9802	112.617	-8.95685
1208	A	4	H	1	20	22	23.9	23.8934	409.921	84.2276	1.1194	6.92953	107.643	0.214806
1208	A	4	H	1	40	42	24.1	24.0868	416.789	99.2928	1.12156	7.4626	123.252	7.58316
1208	A	4	H	1	60	62	24.3	24.2803	421.367	73.5159	1.07609	25.4843	142.49	60.007
1208	A	4	H	1	100	102	24.7	24.6671	428.235	49.5749	0.794433	3.05289	87.1159	18.0691
1208	A	4	H	1	120	122	24.9	24.8605	431.033	46.311	0.840483	4.94857	79.7791	-5.12899
1208	A	4	H	1	140	142	25.1	25.054	433.831	64.0564	0.823195	12.4578	104.471	1.22793
1208	A	4	H	2	10	12	25.3	25.2474	436.884	6.56054	0.865199	-6.93864	121.504	21.2033
1208	A	4	H	2	20	22	25.4	25.3441	437.901	68.0758	0.872153	17.9806	144.939	7.36951
1208	A	4	H	2	80	82	26	25.9244	445.533	88.168	0.779456	9.16915	116.862	5.02591
1208	A	4	H	2	100	102	26.2	26.1178	448.076	84.3511	0.949492	28.3961	134.124	19.3836
1208	A	4	H	2	120	122	26.4	26.3112	450.62	91.7954	0.89327	7.37173	94.7187	5.43147
1208	A	4	H	2	140	142	26.6	26.5046	452.401	20.1305	0.829527	-2.01924	126.429	21.4285
1208	A	4	H	3	0	2	26.7	26.6014	453.927	68.7303	0.845621	16.7321	143.264	4.22847
1208	A	4	H	3	10	12	26.8	26.6981	455.199	73.1929	0.857996	1.69044	113.12	21.311
1208	A	4	H	3	20	22	26.9	26.7948	456.725	72.5036	0.911884	2.28422	167.888	32.7328
1208	A	4	H	3	40	42	27.1	26.9882	459.014	72.2272	0.864636	1.05129	147.468	3.79543
1208	A	4	H	3	60	62	27.3	27.1816	460.795	72.3788	0.878864	5.13368	189.676	12.3949
1208	A	4	H	3	80	82	27.5	27.375	463.084	82.3966	0.937872	-0.294151	187.211	32.5962
1208	A	4	H	3	100	102	27.7	27.5685	465.119	55.4268	0.938567	8.87129	171.435	3.07314
1208	A	4	H	3	120	122	27.9	27.7619	467.154	64.6562	0.897385	6.18866	273.968	48.211
1208	A	4	H	3	140	142	28.1	27.9553	469.444	78.8633	0.949091	3.40465	244.159	15.9319
1208	A	4	H	4	0	2	28.2	28.052	470.715	72.0318	0.918113	11.577	186.861	18.5779
1208	A	4	H	4	10	12	28.3	28.1487	472.242	62.7527	0.988466	4.37393	234.599	11.8848
1208	A	4	H	4	20	22	28.4	28.2455	473.514	63.4543	0.929298	1.51675	196.952	36.8477
1208	A	4	H	4	40	42	28.6	28.4389	475.294	66.199	0.859015	1.80702	112.403	28.3388
1208	A	4	H	4	120	122	29.4	29.2126	485.469	47.0602	0.90904	12.7153	100.346	-5.07682
1208	A	4	H	5	0	2	29.7	29.5027	489.793	59.1959	1.00258	-0.158854	105.526	21.5578
1208	A	4	H	5	60	62	30.3	30.083	498.951	62.2127	0.93725	5.44855	90.3681	21.6535
1208	A	4	H	5	80	82	30.5	30.2764	502.258	77.5282	0.882693	0.486119	113.638	-2.20303
1208	A	4	H	5	140	142	31.1	30.8567	511.669	65.9661	0.82952	0.143137	124.761	24.288
1208	A	4	H	6	0	2	31.2	30.9534	513.45	89.3958	0.932783	5.35287	133.293	13.754
1208	A	4	H	6	10	12	31.3	31.0501	515.231	90.7619	0.950091	1.30564	139.005	4.25635
1208	A	4	H	6	20	22	31.4	31.1468	517.011	69.887	0.870541	-1.0398	116.925	17.4755
1208	A	4	H	6	40	42	31.6	31.3402	520.318	62.8548	0.894979	9.47297	125.018	-4.14812
1208	A	4	H	6	80	82	32	31.7271	526.932	40.9114	0.843513	3.78024	122.909	25.1248
1208	A	4	H	6	100	102	32.2	31.9205	530.238	69.1825	0.841459	5.09821	103.509	0.535776
1208	A	4	H	6	140	142	32.6	32.3074	538.887	25.006	0.826901	10.2998	129.038	32.7871
1208	A	4	H	7	0	2	32.7	32.4041	541.685	78.5545	0.833471	3.6922	101.956	21.8514
1208	A	4	H	7	10	12	32.8	32.5008	544.738	87.4561	0.889045	1.37338	114.652	27.9578
1208	A	4	H	7	20	22	32.9	32.5975	549.062	55.125	0.869611	-0.880211	97.8798	21.4645
1208	A	4	H	7	40	42	33.1	32.7909	554.913	51.5965	0.83506	0.883149	129.53	29.1381
1208	A	4	H	CC	8	10	33.35	33.0327	561.526	94.3306	0.810875	0.101034	108.005	26.9495
1208	A	4	H	CC	18	20	33.45	33.1294	564.833	96.1978	0.884489	9.71395	91.5186	5.8246
1208	A	5	H	1	0	2	33.2	33.2	567.122	35.2189	0.859633	5.96368	66.9621	21.1699
1208	A	5	H	1	7	9	33.27	33.2668	571.192	88.4427	0.945527	33.8752	68.8331	24.5468
1208	A	5	H	1	20	22	33.4	33.3908	574.499	31.065	1.07938	9.36838	76.5403	57.2374
1208	A	5	H	1	40	42	33.6	33.5817	581.113	63.432	0.87905	3.3397	82.5323	23.7246
1208	A	5	H	1	40	42	33.6	33.5817	581.113	65.9118	0.82836	4.3871	71.9235	28.9129
1208	A	5	H	1	60	62	33.8	33.7725	586.455	79.5342	0.761602	2.22719	75.8718	25.56
1208	A	5	H	1	100	102	34.2	34.1542	594.849	76.9567	0.905365	9.95195	90.7215	35.32
1208	A	5	H	1	120	122	34.4	34.345	598.665	85.9086	0.85655	9.62422	64.1293	4.09486
1208	A	5	H	1	120	122	34.4	34.345	598.665	60.1317	0.889326	2.91195	76.5912	28.2157
1208	A	5	H	1	140	142	34.6	34.5359	601.717	68.5156	0.889773	6.90652	125.461	37.2585
1208	A	5	H	2	7	9	34.77	34.6981	604.515	101.825	0.943568	4.33104	148.024	33.8696
1208	A	5	H	2	20	22	34.9	34.8221	607.568	129.71	0.973935	1.79642	118.268	29.1669
1208	A	5	H	2	20	22	34.9	34.8221	607.568	98.8997	0.887319	6.46845	116.054	91.0366
1208	A	5	H	2	40	42	35.1	35.013	612.909	51.6762	0.994756	BDL	167.759	37.1748
1208	A	5	H	2	50	52	35.2	35.1084	615.453	70.6212	0.919536	8.71853	181.514	44.4889
1208	A	5	H	2	60	62	35.3	35.2038	617.488	75.9388	1.06017	0.409146	232.07	48.9321
1208	A	5	H	2	80	82	35.5	35.3947	621.812	85.4216	1.0723	0.516702	210.617	47.8892
1208	A	5	H	2	100	102	35.7	35.5855	626.391	47.246	0.972879	BDL	175.097	58.8201
1208	A	5	H	2	120	122	35.9	35.7763	630.715	70.9639	0.945288	8.42697	185.515	44.3323
1208	A	5	H	2	140	142	36.1	35.9672	634.277	59.5492	0.984008	BDL	227.541	54.5567
1208	A	5	H	3	0	2	36.2	36.0626	636.057	41.2455	0.897664	1.42061	199.629	51.5564
1208	A	5	H	3	0	2	36.2	36.0626	636.057	51.3037	0.975581	5.10061	245.065	59.5961
1208	A	5	H	3	7	9	36.27	36.1294	637.329	22.2132	0.91377	2.90096	217.854	54.0342
1208	A	5	H	3	20	22	36.4	36.2534	640.127	37.5006	0.952783	BDL	243.583	56.532
1208	A	5	H	3	40	42	36.6	36.4443	643.943	22.6419	0.886144	28.52	304.252	65.7371
1208	A	5	H	3	60	62	36.8	36.6351	648.521	63.0088	0.927913	BDL	191.759	41.5025
1208	A	5	H	3	80	82	37	36.826	652.337	34.5603	0.905344	0.0701301	247.852	60.7713
1208	A	5	H	3	100	102	37.2	37.0168	656.153	57.3497	1.00703	2.17099	237.892	52.831
1208	A	5	H	3	120	122	37.4	37.2076	659.459	26.6197	0.909742	BDL	201.701	57.8509
1208	A	5	H	4	0	2	37.7	37.4939	665.056	20.5601	0.716074	BDL	142.402	42.9325
1208	A	5	H	4	7	9	37.77	37.5607	666.328	66.2788	0.890335	BDL	180.374	45.818
1208	A	5	H	4	20	22	37.9	37.6847	668.108	65.0557	0.801823	3.07876	171.97	41.4605
1208	A	5	H	4	40	42	38.1	37.8756	671.415	50.1824	0.786854	BDL	134.413	35.7562
1208	A	5	H	4	60	62	38.3	38.0664	674.467	92.8616	0.79584	1.12933	188.934	23.3247
1208	A	5	H	4	80	82	38.5	38.2573	677.266	76.465	0.899463	0.9066	179.108	47.7671
1208	A	5	H	4	100	102	38.7	38.4481	680.318	75.7235	0.865275	0.59854	173.706	46.0425
1208	A	5	H	4	120	122	38.9	38.6389	683.116	106.565	0.87006	2.15134	145.704	20.5674
1208	A	5	H	4	140	142	39.1	38.8298	686.423	42.4312	0.896864	BDL	201.123	50.5193
1208	A	5	H	4	140	142	39.1	38.8298	686.423	68.7559	0.879792	BDL	172.529	20.0639
1208	A	5	H	5	0	2	39.2	38.9252	688.967	48.5739	0.850052	1.35441	124.244	35.7939
1208	A	5	H	5	7	9	39.27	38.992	691.002	100.505	0.811258	BDL	95.3451	26.852
1208	A	5	H	5	30	32	39.5	39.2115	697.361	43.9585	1.24998	2.56656	179.157	45.8508
1208	A	5	H	5	40	42	39.6	39.3069	699.905	71.2037	0.973938	BDL	201.926	44.6817
1208	A	5	H	5	60	62	39.8	39.4977	705.246	106.699	1.05588	3.26555	180.799	39.7618
1208	A	5	H	5	80	82	40	39.6885	709.571	45.5538	0.786612	1.21169	199.224	45.4332
1208	A	5	H	5	100	102	40.2	39.8794	713.386	82.4378	0.773764	BDL	179.398	44.9405
1208	A	5	H	5	100	102	40.2	39.8794	713.386	70.7703	0.843587	2.96581	128.617	38.3765
1208	A	5	H	5	120	122	40.4	40.0702	715.93	52.8283	0.918238	37.6303	186.337	52.8577
1208	A	5	H	5	140	142	40.6	40.2611	718.728	77.9625	0.754753	BDL	191.34	44.3382
1208	A	5	H	6	0	2	40.7	40.3565	720.254	14.1529	0.881052	2.32139	181.722	38.7096
1208	A	5	H	6	7	9	40.77	40.4233	721.272	66.0428	0.970272	1.38413	241.407	55.3372
1208	A	5	H	6	16	18	40.86	40.5092	723.052	62.6539	0.941507	1.96358	262.764	56.7938
1208	A	5	H	6	28	30	40.98	40.6237	724.579	54.4155	0.835445	2.078	268.761	45.2614
1208	A	5	H	6	60	62	41.3	40.929	729.412	76.8672	0.937838	7.22135	268.043	61.7052
1208	A	5	H	6	60	62	41.3	40.929	729.412	104.29	0.862579	11.4776	267.012	59.7015
1208	A	5	H	6	67	69	41.37	40.9958	730.938	117.144	0.959015	6.39007	247.805	55.4241
1208	A	5	H	6	77	79	41.47	41.0912	733.482	92.9559	0.872706	2.38552	217.08	52.6463
1208	A	5	H	6	82	84	41.52	41.1389	734.754	105.319	0.922841	3.12856	214.664	49.4657
1208	A	5	H	6	90	92	41.6	41.2153	736.789	90.5173	0.91707	1.41923	206.764	49.4431
1208	A	5	H	6	97	99	41.67	41.2821	738.315	76.5173	0.958082	5.31038	197.538	47.1143
1208	A	5	H	6	105	107	41.75	41.3584	740.35	86.8649	0.931429	3.76972	213.143	53.3378
1208	A	5	H	6	111	113	41.81	41.4156	741.622	92.9601	0.928346	4.69205	164.569	40.1399
1208	A	5	H	6	113	115	41.83	41.4347	742.13	62.6599	1.03832	7.43669	197.982	47.2165
1208	A	5	H	6	118	120	41.88	41.4824	743.402	49.0242	0.879612	5.88275	173.921	44.0304
1208	A	5	H	6	135	137	42.05	41.6447	749.762	38.3061	1.12942	5.62697	209.997	40.2845
1208	A	5	H	7	0	4	42.2	41.7878	754.086	34.2243	0.898788	6.11525	233.595	56.9828
1208	A	5	H	7	60	64	42.8	42.3603	773.418	1.16526	1.21777	15.7276	313.155	83.5706
1208	A	5	H	7	67	69	42.87	42.4271	775.453	54.9921	1.14423	4.35951	194.774	50.6518
1208	A	5	H	7	73	77	42.93	42.4844	776.725	32.5943	0.850026	56.6337	55.9354	31.0249
1208	A	5	H	CC	2	4	42.99	42.5416	781.049	81.1413	1.03053	6.93147	118.279	41.4513
1208	A	5	H	CC	7	9	43.04	42.5893	782.321	97.2847	0.943229	6.44294	102.519	35.9394
1208	A	6	H	1	0	4	42.7	42.7	786.137	109.423	0.887956	7.27341	141.013	27.3226
1208	A	6	H	1	0	4	42.7	42.7	786.137	121.161	0.981234	3.27627	155.116	40.3516
1208	A	6	H	1	7	9	42.77	42.7667	789.189	137.753	0.844242	1.33816	129.401	33.2158
1208	A	6	H	1	15	18	42.85	42.843	790.207	115.236	0.799525	3.5063	142.833	39.7683
1208	A	6	H	1	28	30	42.98	42.9669	792.242	107.547	0.793952	1.00834	125.404	40.9902
1208	A	6	H	1	30	32	43	42.986	792.75	105.632	0.991973	5.56968	113.253	34.2711
1208	A	6	H	1	37	39	43.07	43.0527	794.022	72.0918	0.883762	2.77785	162.046	42.881
1208	A	6	H	1	37	39	43.07	43.0527	794.022	76.1468	0.792671	2.98316	109.746	32.0774
1208	A	6	H	1	44	47	43.14	43.1194	795.803	94.7036	0.914781	3.74881	118.965	51.3361
1208	A	6	H	1	52	54	43.22	43.1957	797.583	126.46	0.788247	6.70818	100.667	31.6191
1208	A	6	H	1	62	64	43.32	43.291	799.11	101.505	0.886328	3.13184	153.396	40.5044
1208	A	6	H	1	70	72	43.4	43.3673	800.636	74.8028	0.917013	3.25943	152.167	47.3399
1208	A	6	H	1	75	77	43.45	43.415	801.399	94.514	0.955007	2.48743	206.391	47.9453
1208	A	6	H	1	82	84	43.52	43.4817	802.671	92.4398	0.86581	0.601085	112.02	31.5718
1208	A	6	H	1	90	93	43.6	43.558	803.688	92.4952	0.867532	3.06892	117.562	36.102
1208	A	6	H	1	101	103	43.71	43.6628	805.469	84.4285	0.902311	0.598833	86.7572	26.0541
1208	A	6	H	1	105	108	43.75	43.701	806.232	68.8068	0.845322	5.36492	109.219	35.2745
1208	A	6	H	1	112	114	43.82	43.7677	807.25	90.4181	0.824015	1.95687	102.707	30.1288
1208	A	6	H	1	122	124	43.92	43.863	809.285	87.7548	0.86505	10.2289	109.755	36.3646
1208	A	6	H	1	127	129	43.97	43.9107	810.048	78.8417	0.84497	5.52969	139.107	38.1446
1208	A	6	H	1	135	137	44.05	43.9869	811.32	55.4346	0.903178	3.72962	102.675	34.4077
1208	A	6	H	1	142	144	44.12	44.0537	812.337	94.44	0.840151	3.87839	107.034	33.9016
1208	A	6	H	1	142	144	44.12	44.0537	812.337	103.926	0.8363	1.06976	119.25	32.4452
1208	A	6	H	2	0	4	44.2	44.1299	813.609	93.1884	0.824628	2.70441	100.65	32.9976
1208	A	6	H	2	7	9	44.27	44.1967	814.881	76.0068	0.833363	2.64126	113.829	34.7317
1208	A	6	H	2	15	17	44.35	44.2729	816.153	58.2343	0.882894	9.70256	100.237	32.8567
1208	A	6	H	2	18	20	44.38	44.3015	816.407	48.8357	0.859971	0.916455	90.3135	27.9199
1208	A	6	H	2	29	31	44.49	44.4064	818.442	60.2103	0.943889	2.59056	92.8545	25.7681
1208	A	6	H	2	29	31	44.49	44.4064	818.442	67.7065	0.831636	2.39628	91.7551	25.1689
1208	A	6	H	2	37	39	44.57	44.4827	819.714	81.6995	0.942749	24.4185	89.3351	27.8807
1208	A	6	H	2	47	49	44.67	44.578	821.494	118.152	0.85237	5.02344	106.295	29.2263
1208	A	6	H	2	52	54	44.72	44.6256	822.512	92.4355	0.940462	0.738665	125.157	28.1424
1208	A	6	H	2	62	64	44.82	44.721	824.293	101.507	0.921242	9.11688	75.7412	20.3182
1208	A	6	H	2	75	77	44.95	44.8449	827.091	111.69	0.88286	13.8952	111.3	34.7553
1208	A	6	H	2	82	84	45.02	44.9116	828.617	82.6943	0.986921	1.94356	101.48	25.9492
1208	A	6	H	2	87	89	45.07	44.9593	829.889	89.8633	0.90767	0.74203	124.22	29.0093
1208	A	6	H	2	89	91	45.09	44.9784	830.143	88.4013	1.13488	6.45756	135.889	37.9937
1208	A	6	H	2	89	91	45.09	44.9784	830.143	30.4775	0.864402	3.36392	90.4383	28.5425
1208	A	6	H	2	112	114	45.32	45.1976	834.213	80.1723	0.899159	1.77154	100.189	24.8317
1208	A	6	H	2	120	124	45.4	45.2739	835.485	73.7315	0.859479	10.4663	206.558	49.9496
1208	A	6	H	2	127	129	45.47	45.3406	837.266	71.5701	0.862043	1.08553	88.8359	25.0663
1208	A	6	H	2	135	137	45.55	45.4169	839.046	97.3754	0.87699	3.5683	108.508	31.3532
1208	A	6	H	2	142	144	45.62	45.4836	840.572	110.974	0.844774	1.00724	85.5524	22.7193
1208	A	6	H	2	142	144	45.62	45.4836	840.572	110.615	1.03618	3.91696	116.994	27.8824
1208	A	6	H	3	0	4	45.7	45.5599	842.862	86.5411	1.08557	0.143199	73.704	24.5821
1208	A	6	H	3	4	6	45.74	45.598	844.134	64.6488	0.872509	4.50412	59.6809	19.2801
1208	A	6	H	3	12	15	45.82	45.6743	846.677	89.7026	0.99601	8.73644	66.5094	25.4566
1208	A	6	H	3	12	15	45.82	45.6743	846.677	85.642	1.0093	23.8224	71.973	32.0942
1208	A	6	H	3	16	20	45.86	45.7124	848.458	111.089	1.04384	19.6024	72.5879	31.1232
1208	A	6	H	3	16	20	45.86	45.7124	848.458	76.2998	0.990383	3.1389	90.1327	31.9769
1208	A	6	H	3	30	32	46	45.8459	852.528	84.4479	0.953058	1.76402	97.8231	31.7945
1208	A	6	H	3	38	40	46.08	45.9221	855.58	42.2115	0.927003	19.7093	93.6227	20.516
1208	A	6	H	3	45	48	46.15	45.9888	857.615	73.2269	1.03509	4.7799	128.602	34.5112
1208	A	6	H	3	52	56	46.22	46.0556	859.396	75.9709	1.065	4.14074	127.182	32.0579
1208	A	6	H	3	60	64	46.3	46.1318	860.922	87.2801	1.04958	7.80119	135.176	35.8015
1208	A	6	H	3	66	69	46.36	46.189	862.194	61.0119	1.17769	17.1264	140.579	39.5348
1208	A	6	H	3	77	80	46.47	46.2939	864.229	75.3286	1.17292	0.619632	151.919	36.8398
1208	A	6	H	3	82	85	46.52	46.3416	865.246	83.5398	1.15812	BDL	85.1577	25.1282
1208	A	6	H	3	90	93	46.6	46.4178	866.773	90.6965	1.24242	0.51224	139.353	33.1213
1208	A	6	H	3	97	99	46.67	46.4846	867.79	70.831	0.91726	2.09596	105.019	28.6503
1208	A	6	H	3	105	107	46.75	46.5608	869.316	50.8025	1.00811	5.62555	147.499	42.3055
1208	A	6	H	3	112	114	46.82	46.6276	870.334	84.6381	0.978571	12.7563	126.907	33.862
1208	A	6	H	3	120	124	46.9	46.7038	871.606	36.1758	1.10281	9.13191	110.812	33.7009
1208	A	6	H	3	126	129	46.96	46.761	872.623	75.2561	1.01584	1.42049	163.479	40.3668
1208	A	6	H	3	136	140	47.06	46.8563	875.167	79.7332	1.14309	0.599819	187.344	48.084
1208	A	6	H	3	142	144	47.12	46.9135	876.184	82.6862	1.05514	7.0969	139.86	34.9697
1208	A	6	H	4	0	4	47.2	46.9898	877.711	54.4607	1.05043	0.540771	160.732	41.6021
1208	A	6	H	4	7	9	47.27	47.0565	878.983	86.5255	1.00102	6.02532	146.993	37.1914
1208	A	6	H	4	7	9	47.27	47.0565	878.983	76.4766	1.08851	7.67546	119.115	33.7952
1208	A	6	H	4	15	17	47.35	47.1328	880.254	61.2353	1.25442	BDL	163.282	46.8472
1208	A	6	H	4	22	24	47.42	47.1995	881.272	51.2117	0.709664	5.84457	76.7268	21.5858
1208	A	6	H	4	22	24	47.42	47.1995	881.272	65.6845	0.851593	5.4326	82.2161	24.9905
1208	A	6	H	4	30	32	47.5	47.2758	882.289	53.4046	1.18055	BDL	186.6	47.9657
1208	A	6	H	4	37	39	47.57	47.3425	883.307	69.1722	1.31664	4.35435	128.278	34.3151
1208	A	6	H	4	37	39	47.57	47.3425	883.307	64.3083	1.09573	1.35386	165.205	43.5045
1208	A	6	H	4	45	49	47.65	47.4188	884.324	55.8785	1.08612	2.49126	181.676	49.7179
1208	A	6	H	4	52	54	47.72	47.4855	885.342	81.8523	0.979103	2.68811	171.183	44.4537
1208	A	6	H	4	60	63	47.8	47.5618	886.105	77.1106	1.04216	14.4039	147.786	43.6371
1208	A	6	H	4	67	69	47.87	47.6285	887.377	45.9628	0.934403	3.78035	180.848	40.5109
1208	A	6	H	4	75	77	47.95	47.7048	888.394	43.5828	1.00751	44.5323	118.323	32.1465
1208	A	6	H	4	75	77	47.95	47.7048	888.394	56.8334	1.06024	0.869686	128.102	33.1886
1208	A	6	H	4	81	84	48.01	47.762	889.157	69.2468	0.853366	1.31367	119.072	33.2861
1208	A	6	H	4	90	93	48.1	47.8478	890.429	14.101	1.17022	BDL	152.847	42.2565
1208	A	6	H	4	96	99	48.16	47.905	891.192	81.3474	0.943352	2.99661	134.651	36.2317
1208	A	6	H	4	96	99	48.16	47.905	891.192	72.3255	0.85992	6.88295	135.371	37.4119
1208	A	6	H	4	106	109	48.26	48.0003	892.719	70.1139	1.00584	BDL	129.702	35.59
1208	A	6	H	4	112	114	48.32	48.0575	893.736	83.4796	0.96306	4.48891	107.577	33.2855
1208	A	6	H	4	120	124	48.4	48.1337	894.754	72.1619	0.992303	8.9126	120.035	34.6631
1208	A	6	H	4	127	129	48.47	48.2005	895.771	43.5076	1.00785	4.11136	127.086	32.1102
1208	A	6	H	4	135	137	48.55	48.2767	896.789	57.5072	1.14154	0.824612	149.934	43.4117
1208	A	6	H	4	141	144	48.61	48.3339	897.806	36.0542	0.73713	2.08387	166.605	41.8192
1208	A	6	H	5	7	9	48.77	48.4865	900.35	34.6014	0.919797	7.98017	199.148	41.3273
1208	A	6	H	5	17	20	48.87	48.5818	902.13	43.8297	0.853782	2.6748	239.724	64.3187
1208	A	6	H	5	22	25	48.92	48.6295	903.148	64.7603	0.767671	3.8127	177.6	23.1238
1208	A	6	H	5	30	32	49	48.7057	904.674	93.4765	0.866674	2.0171	147.417	34.9736
1208	A	6	H	5	37	39	49.07	48.7724	905.946	75.2184	0.783043	22.0538	99.3993	17.6701
1208	A	6	H	5	45	48	49.15	48.8487	907.472	92.2274	0.882615	6.62356	142.618	36.0345
1208	A	6	H	5	45	48	49.15	48.8487	907.472	66.932	0.950158	13.5952	162.901	36.465
1208	A	6	H	5	52	54	49.22	48.9154	908.998	72.4404	0.867716	BDL	138.279	29.6126
1208	A	6	H	5	52	54	49.22	48.9154	908.998	91.2004	0.851584	10.688	118.499	37.6951
1208	A	6	H	5	60	63	49.3	48.9917	910.525	102.558	0.909343	2.91172	91.0004	24.5322
1208	A	6	H	5	67	69	49.37	49.0584	912.051	64.0078	0.890627	5.73375	96.8579	22.7775
1208	A	6	H	5	73	77	49.43	49.1156	913.323	64.7233	0.83053	1.64578	87.6467	20.8256
1208	A	6	H	5	82	84	49.52	49.2014	915.358	72.7125	0.815115	19.3768	74.1761	35.9245
1208	A	6	H	5	90	93	49.6	49.2777	917.138	76.8731	0.799872	6.21175	121.901	28.0843
1208	A	6	H	5	97	99	49.67	49.3444	918.156	79.7979	0.795871	BDL	102.813	25.0855
1208	A	6	H	5	112	114	49.82	49.4874	920.7	93.7722	0.821755	20.3857	130.178	30.9888
1208	A	6	H	5	120	124	49.9	49.5637	921.971	115.579	0.816261	19.9955	130.728	39.5566
1208	A	6	H	5	127	129	49.97	49.6304	922.989	72.8806	0.764674	2.69647	88.384	30.7792
1208	A	6	H	5	137	139	50.07	49.7257	924.515	60.7234	0.793141	5.96213	85.9075	24.7937
1208	A	6	H	5	137	139	50.07	49.7257	924.515	68.2393	0.728408	16.3525	92.2738	31.72
1208	A	6	H	5	142	144	50.12	49.7734	925.278	77.639	0.730781	6.12598	71.5835	26.8662
1208	A	6	H	6	0	4	50.2	49.8497	926.55	98.2256	0.811227	4.5423	93.8545	25.3016
1208	A	6	H	6	8	10	50.28	49.9259	927.822	79.5565	0.682251	1.07456	66.8406	22.067
1208	A	6	H	6	17	20	50.35	49.9927	929.094	75.7348	0.825435	0.42452	75.3564	23.7473
1208	A	6	H	6	22	24	50.42	50.0594	930.366	102.325	1.08632	4.02728	170.225	40.0751
1208	A	6	H	6	22	24	50.42	50.0594	930.366	78.7722	1.02373	3.20075	158.797	38.7308
1208	A	6	H	6	29	31	50.49	50.1261	931.638	37.8086	0.894586	4.80236	167.63	39.2534
1208	A	6	H	6	37	40	50.57	50.2024	933.164	87.6972	0.784333	0.261916	81.8232	24.9304
1208	A	6	H	6	45	49	50.65	50.2786	934.944	30.7801	0.87224	BDL	78.2231	23.248
1208	A	6	H	6	52	54	50.72	50.3454	936.979	53.239	0.757161	1.0127	70.5639	22.2849
1208	A	6	H	6	60	63	50.8	50.4216	938.506	56.2104	0.789175	BDL	168.244	39.4468
1208	A	6	H	6	67	69	50.87	50.4884	940.032	50.9248	0.772819	1.14892	110.642	BDL
1208	A	6	H	6	75	77	50.95	50.5646	941.304	53.8535	0.773057	BDL	127.448	27.8643
1208	A	6	H	6	82	85	51.02	50.6314	942.83	91.4271	0.832267	0.848293	132.449	31.1242
1208	A	6	H	6	90	93	51.1	50.7076	944.865	20.0776	0.862705	BDL	131.814	28.2371
1208	A	6	H	6	97	100	51.17	50.7744	946.9	64.4539	0.830736	BDL	104.337	24.5534
1208	A	6	H	6	105	109	51.25	50.8506	948.935	56.0089	0.875259	BDL	177.839	35.8861
1208	A	6	H	6	112	114	51.32	50.9173	950.97	57.6387	0.803246	BDL	125.566	25.0753
1208	A	6	H	6	120	124	51.4	50.9936	952.496	52.717	0.949173	3.32656	197.656	41.1637
1208	A	6	H	6	120	124	51.4	50.9936	952.496	57.0087	0.867019	0.877116	93.5344	21.3219
1208	A	6	H	6	127	130	51.47	51.0603	954.277	70.7845	0.892922	BDL	117.475	24.3421
1208	A	6	H	6	135	137	51.55	51.1366	956.057	85.2587	0.884685	3.81224	104.55	27.715
1208	A	6	H	6	142	144	51.62	51.2033	957.075	54.3246	0.805216	22.1737	97.4264	BDL
1208	A	6	H	7	0	4	51.7	51.2796	958.347	47.2319	0.848197	BDL	140.459	36.3081
1208	A	6	H	7	7	9	51.77	51.3463	959.364	47.1308	0.865477	24.458	70.9202	23.4359
1208	A	6	H	7	15	18	51.85	51.4226	960.636	67.8405	0.925401	1.47337	121.904	32.3901
1208	A	6	H	7	21	24	51.91	51.4798	961.653	48.7221	0.858015	7.3577	113.011	39.4457
1208	A	6	H	7	26	28	51.96	51.5275	962.417	56.8285	0.706289	0.86557	107.428	25.8738
1208	A	6	H	7	30	33	52	51.5656	963.688	67.4508	0.790551	6.09203	138.893	37.942
1208	A	6	H	7	37	39	52.07	51.6323	964.96	67.3751	0.807284	BDL	95.6945	22.552
1208	A	6	H	7	41	43	52.11	51.6704	965.723	74.5614	0.677162	0.693252	62.7434	19.3309
1208	A	6	H	7	46	48	52.16	51.7181	967.25	91.3004	1.03534	BDL	95.9935	24.9428
1208	A	6	H	7	51	53	52.21	51.7658	968.776	59.9077	0.747565	3.46247	103.805	24.3287
1208	A	6	H	7	58	60	52.28	51.8325	970.556	75.6156	0.721932	2.76596	81.8468	19.3522
1208	A	6	H	7	60	64	52.3	51.8516	971.32	57.9917	0.858437	BDL	105.72	25.0175
1208	A	6	H	CC	2	4	52.38	51.9278	974.372	73.7226	0.78205	1.21677	54.7265	18.3387
1208	A	6	H	CC	7	9	52.43	51.9755	976.916	74.468	0.817542	1.21722	110.432	28.0264
1208	A	6	H	CC	15	17	52.51	52.0518	979.459	63.8504	0.768164	1.45071	59.9657	19.2931
1208	A	6	H	CC	22	24	52.58	52.1185	982.512	65.9741	0.820117	BDL	71.6925	17.6827
1208	A	7	H	1	0	4	52.2	52.2	985.056	52.8551	0.785584	BDL	58.7372	21.5696
1208	A	7	H	1	0	2	52.2	52.2	985.056	77.0097	0.747568	1.43879	80.658	24.5596
1208	A	7	H	1	10	12	52.3	52.295	990.906	13.2264	0.788919	1.31686	60.3761	20.9459
1208	A	7	H	1	10	12	52.3	52.295	990.906	47.6106	0.829016	1.10369	62.2295	20.7573
1208	A	7	H	1	15	18	52.35	52.3425	992.687	91.1963	0.88641	1.58825	61.7378	25.4308
1208	A	7	H	1	20	22	52.4	52.3899	994.976	45.0936	0.727656	0.746055	59.2186	25.7488
1208	A	7	H	1	30	33	52.5	52.4849	997.774	98.1161	0.729415	9.06719	82.3468	31.4422
1208	A	7	H	1	40	42	52.6	52.5799	1000.83	93.1857	0.691549	BDL	84.2912	24.2904
1208	A	7	H	1	47	49	52.67	52.6463	1004.64	109.107	0.751163	BDL	63.6639	21.5277
1208	A	7	H	1	60	62	52.8	52.7698	1010.75	84.4599	0.769289	BDL	123.084	10.5848
1208	A	7	H	1	80	82	53	52.9597	1015.58	135.932	0.793115	BDL	146.564	31.9432
1208	A	7	H	1	140	142	53.6	53.5295	1022.96	20.0838	0.646702	BDL	86.8922	27.3554
1208	A	7	H	2	0	2	53.7	53.6245	1024.23	48.6741	0.832512	1.48988	162.309	40.6813
1208	A	7	H	2	60	62	54.3	54.1943	1033.39	147.025	0.892394	BDL	95.7777	24.9284
1208	A	7	H	2	60	62	54.3	54.1943	1033.39	177.707	0.77934	BDL	83.8289	11.7041
1208	A	7	H	2	67	69	54.37	54.2608	1035.42	104.798	0.877843	BDL	86.1517	BDL
1208	A	7	H	2	70	72	54.4	54.2893	1036.69	134.302	0.857641	0.354601	85.1856	23.9489
1208	A	7	H	2	70	72	54.4	54.2893	1036.69	98.8747	0.806661	0.0101749	69.9403	21.6141
1208	A	7	H	2	75	77	54.45	54.3368	1038.47	104.216	0.804416	3.21671	84.5012	BDL
1208	A	7	H	2	80	82	54.5	54.3842	1040.17	94.9446	0.884687	BDL	76.3854	22.2641
1208	A	7	H	2	84	86	54.54	54.4222	1041.53	125.419	0.883796	BDL	65.4417	BDL
1208	A	7	H	2	90	92	54.6	54.4792	1043.82	98.0415	0.901868	1.71976	79.9499	22.9263
1208	A	7	H	2	96	98	54.66	54.5362	1045.85	93.8483	0.852918	2.47356	66.5708	19.5068
1208	A	7	H	2	96	98	54.66	54.5362	1045.85	111.465	0.948475	0.49665	79.8061	23.6562
1208	A	7	H	3	80	82	56	55.8087	1071.29	71.1258	1.00784	0.967825	113.972	29.6337
1208	A	7	H	3	100	102	56.2	55.9987	1074.59	34.4955	0.887273	BDL	95.4983	23.6606
1208	A	7	H	4	40	42	57.1	56.8534	1090.11	60.0887	0.929468	1.68504	123.211	35.6457
1208	A	7	H	4	80	82	57.5	57.2332	1096.47	54.5778	0.863362	2.06497	123.282	49.8583
1208	A	7	H	4	100	102	57.7	57.4232	1102.32	73.6187	0.782892	BDL	60.7284	26.8017
1208	A	7	H	4	120	122	57.9	57.6131	1107.15	83.3045	0.957799	BDL	170.347	67.8981
1208	A	7	H	6	80	82	60.5	60.0822	1168.71	58.6557	1.06177	0.200509	59.4734	19.462
1208	A	7	H	6	100	102	60.7	60.2722	1174.05	20.3716	1.22047	-1.83999	75.9041	20.8713
1208	A	7	H	6	120	122	60.9	60.4621	1178.89	39.8982	0.92313	-1.68579	72.2193	17.2949
1208	A	7	H	6	140	142	61.1	60.652	1184.99	110.568	1.13241	0.672183	61.7244	-1.53143
1208	A	7	H	7	0	2	61.2	60.747	1189.06	84.9201	0.978773	-1.84144	84.1088	23.2267
1208	A	7	H	7	10	12	61.3	60.842	1191.61	78.0541	0.860578	0.170049	98.2832	27.4838
1208	A	7	H	7	20	22	61.4	60.9369	1194.91	49.3541	0.961119	9.72813	63.5583	20.8517
1208	A	8	H	1	0	2	61.7	61.7	1225.95	93.587	0.989951	1.36226	142.239	25.388
1208	A	8	H	1	8	10	61.78	61.7764	1229.25	99.2469	0.998076	12.1022	128.597	8.87815
1208	A	8	H	1	20	22	61.9	61.891	1233.07	93.366	0.839319	-1.89336	67.7141	16.7292
1208	A	8	H	1	40	42	62.1	62.082	1242.99	79.8666	0.89335	-1.2786	105.604	23.0647
1208	A	8	H	1	60	62	62.3	62.2731	1248.08	88.5678	0.862759	-0.968786	113.007	28.2917
1208	A	8	H	1	80	82	62.5	62.4641	1252.66	83.4309	0.829013	-1.2633	61.952	18.5797
1208	A	8	H	2	80	82	64	63.8968	1280.13	79.8641	0.857168	-0.914896	179.036	30.1435
1208	A	8	H	2	100	102	64.2	64.0878	1283.94	96.5768	0.898612	1.09168	112.603	21.5933
1208	A	8	H	2	120	122	64.4	64.2788	1287.76	103.937	0.843397	2.21735	152.073	27.5968
1208	A	8	H	2	140	142	64.6	64.4698	1290.56	74.0431	0.727181	-0.351763	110.709	23.1601
1208	A	8	H	3	0	2	64.7	64.5653	1292.34	112.545	0.826339	1.3477	97.7097	20.1912
1208	A	8	H	3	9	11	64.79	64.6513	1293.86	60.3069	0.726286	-0.837595	65.7481	20.0067
1208	A	8	H	3	20	22	64.9	64.7564	1295.9	103.745	0.737719	-0.464299	62.9077	18.2177
1208	A	8	H	3	40	42	65.1	64.9474	1300.22	20.105	0.821746	8.20072	87.5366	-8.95774
1208	A	8	H	3	60	62	65.3	65.1384	1305.06	103.133	0.824427	2.34246	96.6915	24.4302
1208	A	8	H	3	80	82	65.5	65.3294	1310.14	81.7382	0.818216	6.34177	85.6813	21.8528
1208	A	8	H	3	100	102	65.7	65.5204	1317.27	85.2433	0.846709	0.988233	77.1594	14.0038
1208	A	8	H	3	120	122	65.9	65.7115	1322.86	86.1263	0.802675	-0.688569	79.3255	20.2506
1208	A	8	H	3	140	142	66.1	65.9025	1328.46	73.5092	0.731801	-0.00764529	73.5149	17.0996
1208	A	8	H	4	0	2	66.2	65.998	1331	92.0054	0.711405	1.51286	61.3138	18.4114
1208	A	8	H	4	11	13	66.31	66.1031	1333.8	82.4481	0.886118	0.942041	91.7828	20.7585
1208	A	8	H	4	20	22	66.4	66.189	1335.83	94.0402	0.710533	-0.398123	65.6222	16.836
1208	A	8	H	4	60	62	66.8	66.5711	1343.47	106.538	0.739725	0.421976	48.2267	16.9537
1208	A	8	H	4	80	82	67	66.7621	1347.54	87.6354	0.928972	-0.829654	64.7957	14.6786
1208	A	8	H	4	100	102	67.2	66.9531	1351.35	117.66	0.882331	8.26729	65.7167	20.9898
1208	A	8	H	4	120	122	67.4	67.1441	1355.68	118.903	0.835731	4.34294	66.9816	15.0108
1208	A	8	H	4	140	142	67.6	67.3351	1360	75.6991	0.897011	-1.49173	81.9663	15.1129
1208	A	8	H	5	0	2	67.7	67.4307	1362.29	93.1109	0.851291	1.63526	72.5694	13.7568
1208	A	8	H	5	10	12	67.8	67.5262	1365.09	92.9015	0.787863	-0.264828	66.1883	12.4507
1208	A	8	H	5	20	22	67.9	67.6217	1367.63	84.0348	0.792155	9.15111	94.1489	14.7726
1208	A	8	H	5	40	42	68.1	67.8127	1371.7	105.177	0.738159	2.29528	86.612	-2.12962
1208	A	8	H	5	60	62	68.3	68.0037	1375.26	94.9982	0.816397	1.84408	49.8412	16.9324
1208	A	8	H	5	80	82	68.5	68.1947	1379.33	72.7308	0.770039	4.22636	61.8401	17.3412
1208	A	8	H	5	100	102	68.7	68.3858	1383.66	84.9412	0.795031	-0.452423	46.7921	13.7559
1208	A	8	H	6	0	2	69.2	68.8633	1396.38	77.4467	0.863654	0.342975	78.4074	15.9801
1208	A	8	H	6	40	42	69.6	69.2454	1406.8	83.395	0.768864	-0.0180111	138.707	24.6485
1208	A	8	H	6	60	62	69.8	69.4364	1410.37	84.3102	0.805408	0.449853	56.4939	16.5438
1208	A	8	H	6	120	122	70.4	70.0095	1420.03	43.1218	1.08296	-1.7223	152.839	27.5031
1208	A	8	H	6	140	142	70.6	70.2005	1423.34	81.881	0.753176	1.68571	108.213	23.2776
1208	A	8	H	7	0	2	70.7	70.296	1424.86	94.2311	0.804341	2.19875	58.5909	18.2989
1208	A	8	H	CC	14	16	71.58	71.1365	1445.47	84.3978	0.809717	3.45857	72.9046	21.6458
1208	A	9	H	1	40	42	71.6	71.5824	1453.86	83.8232	0.787686	0.126492	127.33	22.2382

## Sheet: PSU Solver ODP 1208
Age	d18Osw	sg1	sgn1	sg2	sgn2
334.224	NaN	0.125154	0.861765	-0.0713693	0.910461
336.525	0.658317	0.43884	0.854292	0.249225	1.02288
338.408	0.723263	0.583063	0.881618	0.433357	1.03823
340.499	NaN	0.35057	1.07659	0.199631	1.25954
342.8	0.723549	0.573351	0.870992	0.406692	1.02795
345.101	NaN	0.31944	1.11054	0.209405	1.25119
346.984	0.397541	0.183849	0.713662	0.00143262	0.923634
348.239	0.30221	0.160555	0.447486	-0.00754947	0.60329
350.541	NaN	NaN	NaN	NaN	NaN
352.214	NaN	0.123597	0.910922	-0.0229078	1.25738
353.888	0.454659	0.293515	0.630191	0.140014	0.794788
355.771	0.420197	0.266363	0.578457	0.115573	0.74133
357.444	NaN	NaN	NaN	NaN	NaN
358.909	NaN	0.181766	0.956133	-0.0314224	1.107
360.373	0.560902	0.398152	0.710429	0.263679	0.853021
362.046	NaN	-0.0869135	0.637993	-0.15703	0.845681
363.302	0.472987	0.255271	0.662115	0.0718849	0.82405
364.975	0.627124	0.46866	0.800493	0.303247	0.969307
366.648	0.606655	0.436235	0.785897	0.277197	0.932059
367.694	0.587263	0.402714	0.75082	0.259304	0.907167
368.949	NaN	0.0735873	0.844741	-0.0196671	1.09398
369.996	0.454968	0.295303	0.61251	0.122587	0.792506
389.997	NaN	-0.999418	-0.272478	-1.17077	-0.158733
400.76	-0.32856	-0.63035	-0.106201	-0.83849	0.0608418
406.357	-0.247701	-0.415254	-0.0731638	-0.573627	0.084094
409.918	0.18678	-0.267144	0.413131	-0.480712	0.5913
416.786	0.434506	0.239279	0.612778	0.0726624	0.794829
421.365	0.760747	0.493742	1.03922	0.29213	1.22635
428.232	0.897903	0.656778	1.10636	0.437622	1.27284
431.031	0.880042	0.704075	1.0642	0.543192	1.22639
433.83	0.824858	0.674262	0.986937	0.529848	1.12969
435.101	NaN	0.423657	1.21881	0.225917	1.30996
436.882	0.755072	0.56538	0.907233	0.401239	1.0886
437.899	0.698498	0.529014	0.852305	0.401239	1.03074
440.697	NaN	NaN	NaN	NaN	NaN
442.985	NaN	NaN	NaN	NaN	NaN
445.528	NaN	0.49285	1.2322	0.356565	1.37313
448.073	0.750274	0.561358	0.935004	0.411043	1.11955
450.617	0.569693	0.393641	0.750201	0.225091	0.941992
452.397	0.492775	0.348619	0.661765	0.182992	0.81587
453.924	0.456292	0.303893	0.612903	0.137808	0.764592
455.196	0.572849	0.392658	0.754733	0.205158	0.919634
456.723	0.567211	0.412516	0.736586	0.260792	0.904735
459.013	0.543003	0.377588	0.696961	0.230628	0.854766
460.793	0.671265	0.473585	0.854619	0.278261	1.03101
463.082	0.774181	0.608715	0.930775	0.460127	1.10823
465.117	0.642829	0.457182	0.833709	0.295291	1.01578
467.152	0.639579	0.47079	0.789598	0.319986	0.937901
469.442	0.669038	0.506677	0.822537	0.334258	0.971933
470.713	0.717613	0.548437	0.872384	0.390581	1.0176
472.239	0.5536	0.352795	0.769351	0.199035	0.946414
473.511	0.391389	0.226039	0.572148	0.0688608	0.73585
475.292	0.353772	0.179425	0.5074	0.0331393	0.657017
477.581	NaN	NaN	NaN	NaN	NaN
480.38	NaN	NaN	NaN	NaN	NaN
482.924	NaN	NaN	NaN	NaN	NaN
485.468	NaN	-0.522033	0.198624	-0.724459	0.306455
488.521	NaN	-0.521873	0.198532	-0.724459	0.306455
489.792	-0.175872	-0.336372	-0.00864408	-0.470336	0.128147
491.318	NaN	NaN	NaN	NaN	NaN
493.099	NaN	NaN	NaN	NaN	NaN
495.897	NaN	-0.673037	0.0687157	-0.835807	0.260911
498.949	-0.350949	-0.51404	-0.186384	-0.693869	-0.0311091
502.256	-0.367902	-0.536812	-0.212206	-0.718714	-0.0537485
505.817	NaN	NaN	NaN	NaN	NaN
508.36	NaN	-0.279239	0.549836	-0.503723	0.810594
511.667	0.272012	0.0353344	0.464031	-0.174999	0.631365
513.448	0.419093	0.256122	0.585514	0.0655071	0.75241
515.228	0.278459	0.0719025	0.491073	-0.0855292	0.680293
517.009	0.147372	-0.0143556	0.308254	-0.182353	0.464619
520.316	0.0192447	-0.170983	0.195126	-0.354297	0.367766
526.929	0.0345282	-0.154389	0.199798	-0.32954	0.357784
530.236	0.0831177	-0.0976397	0.237156	-0.258941	0.365975
534.053	NaN	0.0818276	0.827348	-0.000580186	0.942905
538.885	0.527815	0.35609	0.70112	0.208176	0.857412
541.683	0.432354	0.259131	0.622814	0.0791479	0.812269
544.736	0.485011	0.313446	0.670097	0.132418	0.833562
549.061	0.434767	0.256552	0.607518	0.0829503	0.799251
554.913	0.226203	0.0409041	0.428623	-0.120056	0.591631
561.526	0.217565	0.0453064	0.391646	-0.113613	0.529765
564.832	-0.436396	-0.6599	0.266174	-0.821089	0.472951
567.121	-0.184673	-0.556171	0.0283366	-0.788341	0.208682
571.19	0.210091	-0.0925635	0.423339	-0.309227	0.578445
574.497	0.29668	0.155595	0.456661	0.0137979	0.584146
581.112	NaN	-0.411803	0.340716	-0.55961	0.418863
586.454	-0.0429476	-0.197485	0.120719	-0.337956	0.294899
590.778	NaN	-0.332649	0.405838	-0.416867	0.526053
594.848	0.0250085	-0.152635	0.183738	-0.286274	0.345941
598.664	NaN	-0.196807	0.579492	-0.289789	0.698543
601.717	0.304268	0.114536	0.480654	-0.0750086	0.646931
604.515	0.364843	0.205362	0.513424	0.0506075	0.690709
607.568	NaN	-0.349909	0.404461	-0.467515	0.541797
612.91	0.0262956	-0.138927	0.181718	-0.26291	0.368002
615.454	NaN	-0.0708747	0.665496	-0.153265	0.788238
617.489	0.765949	0.298443	0.973259	0.0752958	1.15646
621.814	1.30525	0.852691	1.51633	0.625365	1.69837
626.393	1.31628	1.13088	1.49015	0.955205	1.68178
630.717	1.31648	1.1491	1.48835	0.989006	1.65606
634.278	1.33677	1.17773	1.51291	1.06122	1.66878
636.058	NaN	0.731613	1.45829	0.630329	1.55776
637.33	1.21863	1.03438	1.40217	0.850646	1.54691
640.128	1.0246	0.824787	1.29105	0.645772	1.48256
643.944	0.917839	0.753686	1.0715	0.600725	1.23238
648.523	0.878624	0.719207	1.0434	0.574519	1.20465
652.338	0.803941	0.637309	0.974129	0.458024	1.14918
656.154	0.748166	0.588181	0.915564	0.419287	1.05957
659.461	0.218996	-0.00313376	0.757211	-0.182911	0.986806
663.531	NaN	-0.262693	0.503279	-0.380033	0.667594
665.057	0.382805	0.0909214	0.602868	-0.12049	0.766992
666.329	0.446456	0.27287	0.606973	0.116809	0.7622
668.109	0.172798	-0.0220032	0.437651	-0.196691	0.666401
671.416	0.231241	0.0372907	0.421124	-0.15805	0.585816
674.468	0.457369	0.26052	0.637708	0.092274	0.818078
677.267	0.412948	0.231957	0.590758	0.0714864	0.782308
680.319	0.284819	0.113104	0.458234	-0.0530581	0.622518
683.117	0.234305	0.078445	0.418488	-0.0781309	0.580799
686.425	NaN	-0.440379	0.323074	-0.652455	0.549832
688.968	-0.3248	-0.522808	-0.0592361	-0.713397	0.140762
691.003	-0.396412	-0.554377	-0.240403	-0.723739	-0.114092
694.564	NaN	0.484085	1.21678	0.371425	1.48578
697.362	-0.296794	-0.529278	0.869794	-0.691775	1.08607
699.905	0.125344	-0.418289	0.3502	-0.628639	0.552925
705.248	0.211604	0.0485239	0.38664	-0.102013	0.552925
709.572	0.196266	0.0252415	0.378743	-0.102013	0.522549
713.387	NaN	NaN	NaN	NaN	NaN
715.931	NaN	-0.030315	0.698026	-0.252996	0.840954
718.729	0.437656	0.251892	0.61817	0.082549	0.783704
720.256	0.756979	0.491328	0.961608	0.272259	1.1369
721.273	0.722473	0.550051	0.911344	0.361262	1.09398
723.054	0.599466	0.437024	0.761192	0.280057	0.917085
724.58	0.578997	0.416844	0.736075	0.215502	0.895311
727.887	NaN	NaN	NaN	NaN	NaN
729.413	NaN	0.207596	0.958362	0.0548421	1.04008
730.94	0.326186	0.114356	0.563677	-0.066961	0.760596
733.483	0.315706	0.142775	0.499911	-0.0309134	0.654634
734.755	0.478222	0.297585	0.651796	0.118299	0.805272
736.79	0.603017	0.427453	0.768457	0.261454	0.964289
738.316	0.333759	0.113501	0.667087	-0.066322	0.878094
740.35	0.605333	0.322831	0.801534	0.0187817	0.96885
741.622	0.66276	0.503975	0.831336	0.3506	0.99123
742.131	0.54919	0.372714	0.739136	0.232394	0.919224
743.402	0.500038	0.352577	0.659302	0.193903	0.8155
744.165	NaN	NaN	NaN	NaN	NaN
745.945	NaN	NaN	NaN	NaN	NaN
746.708	NaN	0.462647	1.22629	0.30614	1.44258
749.761	0.847072	0.676254	0.999516	0.534306	1.18102
751.287	NaN	0.32897	1.08175	0.0970146	1.31471
754.085	0.696725	0.54914	0.865879	0.405756	0.996551
755.175	NaN	NaN	NaN	NaN	NaN
755.357	NaN	NaN	NaN	NaN	NaN
757.9	NaN	NaN	NaN	NaN	NaN
758.918	NaN	NaN	NaN	NaN	NaN
766.804	NaN	-0.787856	1.02384	-1.00894	1.12303
773.418	NaN	0.290966	1.03515	0.127444	1.12303
775.453	-0.389105	-0.613836	0.6704	-0.783702	0.90458
776.725	0.202029	-0.365806	0.435099	-0.708355	0.63655
781.049	0.227913	0.0466763	0.418908	-0.117904	0.621595
782.321	0.171829	0.0034815	0.306531	-0.13152	0.468428
786.136	NaN	-0.416995	0.409676	-0.625076	0.612615
789.189	-0.0251542	-0.197471	0.16095	-0.364082	0.327625
790.206	0.144742	-0.102957	0.449402	-0.288587	0.651636
792.241	0.314447	0.0161043	0.520093	-0.210064	0.692877
792.75	0.407366	0.225497	0.548911	0.0660138	0.726226
794.022	NaN	0.271731	1.04889	0.0136096	1.18426
795.803	0.563184	0.382936	0.736093	0.219521	0.901091
797.584	0.623644	0.436746	0.802447	0.2715	0.968127
799.11	0.746044	0.552316	0.928701	0.380546	1.11449
800.636	0.685088	0.496116	0.885404	0.342788	1.06914
801.399	0.758231	0.549952	0.940037	0.381289	1.0976
802.671	0.717251	0.536441	0.898971	0.369314	1.05749
803.688	0.623326	0.454854	0.779374	0.309245	0.935081
805.469	0.609834	0.441581	0.760054	0.299085	0.921325
806.232	0.558297	0.400918	0.716452	0.244381	0.883696
807.249	0.359671	0.163834	0.572636	0.00153122	0.784028
809.284	0.279948	0.101353	0.436605	-0.049272	0.595675
810.047	NaN	-0.116303	0.654743	-0.193368	0.748685
811.319	0.261388	0.0980473	0.410153	-0.0607238	0.586749
812.336	NaN	-0.0888614	0.656556	-0.263566	0.844051
813.609	0.209531	0.0205733	0.371688	-0.133722	0.537968
814.88	0.227015	0.0596055	0.386984	-0.107532	0.549809
816.152	NaN	-0.118261	0.647765	-0.224129	0.841599
816.407	0.251628	0.098668	0.399366	-0.0582421	0.569567
818.441	NaN	-0.142971	0.583572	-0.290165	0.683405
819.713	-0.192418	-0.418471	0.223189	-0.59603	0.453691
821.493	0.0161511	-0.312067	0.230562	-0.523472	0.420413
822.511	-0.0552294	-0.230179	0.159395	-0.41475	0.353402
824.291	-0.117212	-0.275253	0.028505	-0.444099	0.203644
825.309	NaN	-0.454114	0.26389	-0.603888	0.343767
827.089	0.312435	-0.114596	0.533661	-0.345552	0.695745
828.615	0.214031	0.0065551	0.45282	-0.145309	0.652618
829.887	0.118775	-0.0349791	0.283949	-0.167427	0.448062
830.142	NaN	-0.486108	0.449946	-0.674636	0.601084
834.212	-0.0732586	-0.272569	0.140768	-0.456499	0.347082
835.483	-0.159198	-0.344564	0.0110649	-0.485089	0.137045
837.265	NaN	NaN	NaN	NaN	NaN
839.045	NaN	NaN	NaN	NaN	NaN
840.571	NaN	0.0825177	0.798412	-0.0887148	1.01268
842.861	0.449415	0.310422	0.598163	0.122387	0.751558
844.133	NaN	NaN	NaN	NaN	NaN
846.677	NaN	NaN	NaN	NaN	NaN
848.457	NaN	-0.300756	0.448861	-0.465542	0.589814
852.526	-0.105683	-0.31055	0.106901	-0.474302	0.298471
855.579	-0.079079	-0.26185	0.0934681	-0.424488	0.269988
857.614	-0.0336124	-0.197293	0.124673	-0.35307	0.319219
859.395	NaN	NaN	NaN	NaN	NaN
860.921	NaN	-0.155409	0.610084	-0.256034	0.929061
862.194	0.382197	0.171663	0.609333	0.00428984	0.834062
864.229	0.530892	0.325254	0.723086	0.111455	0.909528
865.246	0.913308	0.59194	1.12332	0.374422	1.28811
866.772	0.447704	0.226153	1.02328	0.0442184	1.23601
867.79	0.730459	0.333846	0.949982	0.108923	1.1267
869.316	0.855797	0.696966	1.01683	0.533718	1.18141
870.334	1.11612	0.844649	1.31548	0.626376	1.48871
871.606	1.19667	1.05924	1.37278	0.911873	1.52222
872.624	NaN	0.918094	1.66902	0.623205	1.78236
875.168	1.26172	1.09715	1.4223	0.955918	1.59338
876.186	1.17939	1.00494	1.34931	0.848903	1.51365
877.712	1.14661	0.970238	1.32013	0.848812	1.46082
878.984	NaN	1.40091	2.14933	1.28849	2.36293
880.255	1.77268	1.61085	1.94069	1.4595	2.10593
881.273	NaN	1.20956	1.95976	1.09393	2.0716
882.29	1.61138	1.4214	1.77646	1.27357	1.91383
883.308	NaN	0.717838	1.47222	0.605932	1.56985
884.326	1.06769	0.912122	1.22377	0.737856	1.40521
885.343	1.0182	0.845168	1.17337	0.69442	1.33543
886.106	0.798777	0.608362	1.03263	0.435517	1.21592
887.378	0.713983	0.566235	0.864609	0.401015	1.04588
888.395	NaN	0.227325	0.984474	0.154695	1.13973
889.158	1.17313	0.596058	1.3879	0.35807	1.57085
890.43	1.27879	1.1202	1.43616	0.976244	1.59295
891.193	NaN	0.376083	1.14373	0.217116	1.23881
892.719	0.784238	0.617327	0.948768	0.45126	1.09245
893.737	0.841956	0.669879	1.00607	0.512978	1.1701
894.754	0.821261	0.654531	0.99547	0.485032	1.15927
895.772	1.05108	0.779895	1.26805	0.569525	1.44084
896.789	1.14672	0.993872	1.30765	0.819947	1.47059
897.807	NaN	NaN	NaN	NaN	NaN
899.333	NaN	0.160721	0.891876	-0.037669	1.00844
900.35	0.3441	0.136372	0.558606	-0.0587237	0.761165
902.131	0.0836413	-0.11318	0.302962	-0.274393	0.505288
903.148	0.00245631	-0.151161	0.151756	-0.291996	0.282109
904.674	NaN	-0.467696	0.294862	-0.573556	0.530043
905.946	-0.0869447	-0.243905	0.0780584	-0.405439	0.255075
907.473	NaN	NaN	NaN	NaN	NaN
908.999	NaN	-0.180991	0.59042	-0.395243	0.782726
910.525	0.135866	-0.0413268	0.297625	-0.19777	0.468161
912.051	0.0987336	-0.0571886	0.262929	-0.193221	0.418293
913.323	0.0847046	-0.0642857	0.258498	-0.193221	0.420231
915.357	NaN	-0.0771945	0.734161	-0.178971	1.01804
917.138	0.487282	0.267688	0.67735	0.0800809	0.843773
918.155	0.550747	0.399958	0.720276	0.235699	0.887441
919.681	NaN	0.159288	0.915801	0.00245464	1.05965
920.699	0.434317	0.264765	0.613603	0.0975906	0.775837
921.971	0.294448	0.126777	0.474669	-0.0224042	0.6406
922.988	0.253025	0.0940766	0.435615	-0.0395843	0.59647
924.515	NaN	NaN	NaN	NaN	NaN
925.278	NaN	-0.343156	0.392706	-0.470424	0.52894
926.55	-0.175867	-0.379791	0.0451723	-0.566541	0.238266
927.822	-0.185619	-0.34956	-0.00877898	-0.502243	0.171579
929.093	-0.150317	-0.319744	0.00938415	-0.433543	0.1983
930.366	NaN	-0.315229	0.440183	-0.574032	0.529951
931.637	-0.11503	-0.312813	0.0865446	-0.476242	0.268943
933.163	-0.36625	-0.562958	-0.147075	-0.737333	0.0607046
934.944	-0.508433	-0.679286	-0.343305	-0.840383	-0.170271
936.978	-0.511132	-0.675517	-0.348637	-0.835242	-0.20249
938.505	-0.421893	-0.588919	-0.25797	-0.764313	-0.0833494
940.031	-0.500333	-0.684184	-0.314284	-0.850312	-0.109568
941.303	-0.54831	-0.714844	-0.391067	-0.863214	-0.241554
942.829	NaN	-0.790224	-0.0590627	-0.949853	0.0743091
944.864	-0.518391	-0.692996	-0.336481	-0.862762	-0.173533
946.899	-0.583277	-0.7422	-0.419108	-0.924414	-0.243651
948.935	NaN	-1.22448	-0.474201	-1.36108	-0.415937
950.97	-0.875375	-1.02292	-0.694018	-1.15103	-0.549066
952.496	NaN	-0.494613	0.224805	-0.618835	0.397452
954.276	-0.601497	-0.830938	-0.106008	-1.01842	0.100777
956.057	-0.338751	-0.737713	-0.122156	-0.962608	0.0576226
957.074	-0.458252	-0.653327	-0.207995	-0.801279	-0.000369113
958.346	-0.489953	-0.63933	-0.323761	-0.771072	-0.156447
959.364	0.00556711	-0.467532	0.226707	-0.675435	0.414087
960.636	-0.141334	-0.352867	0.123805	-0.518856	0.353032
961.653	-0.0421544	-0.280725	0.161654	-0.480852	0.31696
962.416	0.0578063	-0.110897	0.220898	-0.272941	0.351126
963.688	NaN	-0.124136	0.772675	-0.355921	1.01906
964.96	0.106517	-0.115442	0.412187	-0.291493	0.632021
965.723	0.962086	-0.00085539	1.185	-0.258335	1.34598
967.249	0.126727	-0.0895158	1.07764	-0.275625	1.28834
968.775	-0.0262729	-0.268578	0.198856	-0.470839	0.368501
970.556	0.0375482	-0.223676	0.247697	-0.470296	0.401546
971.319	-0.184848	-0.400697	0.146629	-0.579886	0.351436
974.371	-0.31636	-0.476524	-0.160879	-0.65122	-0.00743947
976.915	-0.427371	-0.609043	-0.252547	-0.778012	-0.0933421
979.459	-0.172223	-0.492616	0.0458383	-0.724514	0.21861
982.511	-0.0832484	-0.245317	0.0972892	-0.418534	0.232744
985.054	NaN	NaN	NaN	NaN	NaN
990.906	NaN	NaN	NaN	NaN	NaN
992.686	NaN	-0.899145	-0.141526	-1.05945	-0.077139
994.976	-0.381051	-0.573662	-0.195709	-0.738911	-0.0325165
997.773	-0.415205	-0.588398	-0.234617	-0.748946	-0.0667879
1000.83	-0.14104	-0.474568	0.0759537	-0.694372	0.235583
1004.64	-0.361489	-0.576007	-0.0309196	-0.735646	0.176843
1010.75	-0.702112	-0.902554	-0.436833	-1.05071	-0.203378
1015.58	-0.798257	-0.940045	-0.641499	-1.06046	-0.499796
1020.16	NaN	-1.41281	0.138125	-1.63814	0.344705
1022.96	-0.298147	-1.08014	-0.0784945	-1.31608	0.0939424
1024.23	-0.181857	-0.354187	-0.0441163	-0.520789	0.106214
1027.28	NaN	NaN	NaN	NaN	NaN
1030.08	NaN	NaN	NaN	NaN	NaN
1033.39	NaN	NaN	NaN	NaN	NaN
1035.42	NaN	NaN	NaN	NaN	NaN
1036.69	NaN	-0.019909	0.711707	-0.249963	0.850266
1038.47	0.355854	0.202557	0.535655	0.0540014	0.672964
1040.17	NaN	0.00804807	0.733623	-0.14669	0.87631
1041.53	0.462677	0.29271	0.654486	0.119669	0.820414
1043.82	0.514345	0.369781	0.686919	0.215377	0.873553
1045.85	NaN	NaN	NaN	NaN	NaN
1046.87	NaN	NaN	NaN	NaN	NaN
1052.21	NaN	NaN	NaN	NaN	NaN
1057.04	NaN	NaN	NaN	NaN	NaN
1059.08	NaN	NaN	NaN	NaN	NaN
1061.11	NaN	-1.02573	-0.304633	-1.10826	-0.134377
1068.24	NaN	-1.02573	-0.304633	-1.10826	-0.134377
1071.29	-0.704433	-0.868341	-0.531229	-1.01542	-0.361847
1074.6	-0.723185	-0.8874	-0.54985	-1.02481	-0.391645
1077.65	NaN	NaN	NaN	NaN	NaN
1081.46	NaN	NaN	NaN	NaN	NaN
1085.28	NaN	NaN	NaN	NaN	NaN
1086.81	NaN	0.0416883	0.782515	-0.149114	1.10081
1090.11	-0.108482	-0.336076	0.426351	-0.514809	0.670362
1096.47	-0.11383	-0.293596	0.0700675	-0.477794	0.226938
1102.32	-0.209223	-0.394611	-0.016815	-0.554749	0.187537
1107.16	-0.267377	-0.439799	-0.121	-0.583074	0.0295958
1110.97	NaN	NaN	NaN	NaN	NaN
1116.06	NaN	NaN	NaN	NaN	NaN
1123.94	NaN	NaN	NaN	NaN	NaN
1127.25	NaN	NaN	NaN	NaN	NaN
1130.3	NaN	NaN	NaN	NaN	NaN
1133.1	NaN	NaN	NaN	NaN	NaN
1136.41	NaN	NaN	NaN	NaN	NaN
1139.97	NaN	NaN	NaN	NaN	NaN
1142	NaN	NaN	NaN	NaN	NaN
1144.8	NaN	NaN	NaN	NaN	NaN
1147.34	NaN	NaN	NaN	NaN	NaN
1154.21	NaN	NaN	NaN	NaN	NaN
1162.1	NaN	-0.145946	0.63032	-0.383962	0.832691
1168.71	0.251228	0.0900954	0.403379	-0.107153	0.554973
1174.05	NaN	-0.575747	0.171366	-0.954805	0.347487
1178.89	0.409036	-0.211868	0.635593	-0.462966	0.801677
1184.99	0.286061	0.080975	0.532198	-0.0910041	0.749791
1189.06	0.202369	0.0301972	0.347979	-0.127649	0.489922
1191.6	NaN	0.294931	1.03482	0.1979	1.11495
1194.91	0.659854	0.501449	0.816775	0.323992	0.990063
1201.27	NaN	NaN	NaN	NaN	NaN
1206.36	NaN	NaN	NaN	NaN	NaN
1210.43	NaN	NaN	NaN	NaN	NaN
1215.51	NaN	NaN	NaN	NaN	NaN
1220.09	NaN	-0.820396	-0.0692508	-0.964723	0.0458934
1225.94	-0.287089	-0.481298	-0.108688	-0.662853	0.0921143
1229.25	-0.229659	-0.383769	-0.0694969	-0.516634	0.104784
1233.06	NaN	-0.144833	0.615036	-0.322959	0.78104
1242.98	0.374244	0.186032	0.559917	-0.0148954	0.725957
1248.07	0.395389	0.214137	0.564317	0.0695898	0.717623
1252.65	0.365057	0.194821	0.540044	0.053964	0.683213
1255.96	NaN	NaN	NaN	NaN	NaN
1264.86	NaN	NaN	NaN	NaN	NaN
1266.38	NaN	NaN	NaN	NaN	NaN
1268.67	NaN	NaN	NaN	NaN	NaN
1272.24	NaN	NaN	NaN	NaN	NaN
1276.31	NaN	-0.785697	-0.0397313	-0.961022	0.0742559
1280.12	-0.0956395	-0.425783	0.134012	-0.640456	0.306149
1283.94	0.291698	0.0132523	0.506467	-0.214012	0.655195
1287.75	0.0981366	-0.112722	0.405271	-0.291192	0.60229
1290.55	0.051604	-0.109816	0.216143	-0.279532	0.363722
1292.33	-0.0285268	-0.202977	0.166152	-0.365417	0.345725
1293.86	-0.00527718	-0.177479	0.152714	-0.335799	0.318756
1295.89	0.1213	-0.0476241	0.297875	-0.204328	0.447566
1300.21	-0.0987015	-0.300988	0.194979	-0.483838	0.385718
1305.05	-0.294346	-0.464304	-0.110077	-0.633628	0.0578243
1310.14	-0.261802	-0.427427	-0.0796283	-0.597327	0.0693447
1317.26	-0.195549	-0.368384	-0.029967	-0.529729	0.116394
1322.85	-0.143897	-0.299892	0.0215577	-0.473042	0.18747
1328.45	-0.135561	-0.287494	0.0355584	-0.441609	0.199075
1330.99	0.224362	-0.15	0.438521	-0.343759	0.628746
1333.79	0.0438703	-0.166106	0.336806	-0.345539	0.587154
1335.83	-0.0483486	-0.224217	0.0999372	-0.369723	0.25481
1339.39	NaN	-0.738024	0.0081269	-0.921877	0.173819
1343.46	-0.294266	-0.453076	-0.129913	-0.629388	0.04376
1347.53	-0.272869	-0.409626	-0.109237	-0.562111	0.0632681
1351.34	NaN	-1.11157	-0.383993	-1.24474	-0.2575
1355.67	-0.386022	-0.758012	-0.16227	-1.00335	0.0118698
1359.99	-0.281099	-0.433876	-0.120864	-0.603636	0.0348199
1362.28	-0.211208	-0.38244	-0.0479309	-0.56062	0.129564
1365.08	-0.174719	-0.343187	-0.0153125	-0.507008	0.148165
1367.63	NaN	-0.485579	0.285219	-0.633059	0.387695
1371.7	0.0303388	-0.162079	0.214316	-0.355565	0.38931
1375.26	-0.00343696	-0.180608	0.16606	-0.339011	0.35148
1379.33	-0.21719	-0.411159	-0.00756718	-0.580418	0.172571
1383.65	-0.294932	-0.45879	-0.127517	-0.603162	0.0196913
1388.23	NaN	NaN	NaN	NaN	NaN
1393.32	NaN	-0.910751	-0.138405	-1.0736	0.0229187
1396.37	-0.521787	-0.68971	-0.351526	-0.842114	-0.207312
1402.73	NaN	-0.619324	0.150228	-0.745138	0.374743
1406.8	0.0214706	-0.243027	0.230334	-0.463381	0.413061
1410.36	0.546672	0.110725	0.778037	-0.115928	0.930175
1416.97	NaN	0.304015	1.01952	0.113781	1.12777
1420.03	-0.22043	-0.493227	0.542294	-0.680631	0.843077
1423.33	-0.234879	-0.462435	-0.0327637	-0.66271	0.107745
1424.86	-0.158503	-0.297968	0.0147449	-0.46238	0.141098
1432.75	NaN	NaN	NaN	NaN	NaN
1437.32	NaN	-0.877774	-0.145838	-1.03651	-0.0913946
1442.92	NaN	-0.876243	-0.146877	-1.03651	-0.0913946
1445.46	-0.483552	-0.646735	-0.331285	-0.808163	-0.204926
1446.99	NaN	NaN	NaN	NaN	NaN
1449.28	NaN	NaN	NaN	NaN	NaN
1450.81	NaN	-0.267055	0.512491	-0.355512	0.623817
1453.86	0.0989853	-0.0610919	0.269386	-0.190352	0.420359

## Sheet: PSU Solver ODP 1123
Age	d18Osw	sg1	sgn1	sg2	sgn2
7.00005	-0.282875	-0.458221	-0.107929	-0.628979	0.0705692
8.08581	-0.322997	-0.496107	-0.158384	-0.649928	0.0377474
8.4478	-0.130521	-0.367287	0.126581	-0.575075	0.32971
10.0768	-0.00547139	-0.23761	0.20301	-0.424626	0.36579
10.2577	0.0753704	-0.0962391	0.240847	-0.239055	0.401915
10.9818	NaN	-0.140269	0.893968	-0.375751	1.08992
11.7058	0.238107	0.0239852	0.503867	-0.129149	0.7191
12.0678	0.141079	-0.00327717	0.289941	-0.144894	0.481934
12.4298	NaN	0.00267883	1.13898	-0.227517	1.32098
13.5161	0.446845	0.215071	0.811915	0.0296487	1.03567
13.697	0.679079	0.326906	0.907847	0.0922443	1.08777
14.0589	0.761352	0.598462	0.93118	0.449473	1.09999
15.1449	NaN	0.37483	1.15953	0.225141	1.31009
15.3259	0.936207	0.746866	1.13723	0.550374	1.3327
16.9549	1.0067	0.832094	1.18931	0.655205	1.37037
17.3168	1.05341	0.80793	1.30103	0.598462	1.47532
18.7648	1.15011	0.842551	1.34883	0.601257	1.52204
18.9458	1.34262	1.16835	1.51861	0.980383	1.64331
20.2125	NaN	1.00791	1.74439	0.838987	1.89434
20.5745	1.39605	1.25162	1.54449	1.06792	1.65902
20.9366	NaN	-0.74233	0.0273079	-0.913006	0.229046
21.2986	0.619967	-0.370851	0.830601	-0.612097	1.00128
21.6605	1.20193	0.727746	1.42007	0.506624	1.58478
22.0225	1.13277	0.794887	1.35142	0.536959	1.50896
22.7464	0.850372	0.637327	1.16311	0.456659	1.38754
23.1084	1.332	0.749382	1.55282	0.495	1.74049
23.8325	1.24618	1.03602	1.46844	0.822589	1.65378
24.5563	1.11334	0.926416	1.30236	0.751523	1.51088
24.9183	1.03468	0.893259	1.21097	0.741837	1.344
25.0994	NaN	0.86716	1.59607	0.745197	1.73306
25.4612	1.14954	0.982422	1.31215	0.825068	1.49075
25.8232	1.18596	1.00707	1.35792	0.849845	1.51257
26.1851	0.915457	0.697433	1.23016	0.522707	1.47431
26.7283	0.926102	0.750249	1.09032	0.580383	1.25782
27.0903	0.814088	0.629474	1.0096	0.476409	1.19544
27.4522	0.741077	0.576321	0.897098	0.414077	1.04629
27.8141	0.767833	0.602717	0.919872	0.446064	1.09062
28.1762	0.834871	0.67431	1.0127	0.519504	1.17544
28.5381	0.858444	0.706705	1.02977	0.553275	1.20658
28.719	NaN	0.329916	1.10321	0.206242	1.35957
29.081	0.703513	0.548461	0.894044	0.425096	1.06371
29.6241	NaN	0.541372	1.24292	0.38223	1.40799
30.348	0.932697	0.769333	1.07282	0.595675	1.22844
30.7099	NaN	0.591521	1.34225	0.350841	1.50408
31.0719	1.11267	0.909287	1.27843	0.740218	1.44824
31.4339	0.510677	0.294142	1.17461	0.129942	1.39584
31.7958	0.565729	0.368904	0.760391	0.175826	0.921316
32.1578	0.641294	0.492323	0.811381	0.319168	0.925269
32.3389	NaN	0.47777	1.24398	0.246858	1.39572
34.1488	NaN	0.482356	1.24458	0.3035	1.39572
34.3297	0.863591	0.698004	1.01142	0.54388	1.17867
34.8725	1.083	0.835148	1.30035	0.614291	1.48781
35.2344	1.03526	0.753295	1.27244	0.545399	1.47863
36.1391	0.888729	0.687209	1.17453	0.508284	1.38666
36.501	0.622392	0.354955	0.884545	0.169186	1.07767
37.2248	0.720494	0.440783	0.932139	0.206233	1.11146
37.5867	0.841241	0.684434	1.00205	0.528925	1.15679
38.3106	0.861543	0.704325	1.03515	0.553436	1.1707
38.6725	0.885989	0.730722	1.05732	0.576882	1.18725
38.8535	NaN	0.228764	1.01515	0.0661388	1.17668
39.2154	0.634743	0.471093	0.801636	0.323094	0.968785
39.5774	0.725886	0.546974	0.90246	0.369516	1.04458
39.9393	0.680324	0.49258	0.878049	0.336521	1.01285
40.3013	NaN	0.235331	0.959994	0.101049	1.05233
40.4823	0.572445	0.416378	0.735227	0.267489	0.897562
40.8443	NaN	0.112919	1.19979	-0.047147	1.36451
41.5682	0.503666	0.28399	0.853459	0.119235	1.07208
41.9302	0.560019	0.353095	0.768818	0.152214	0.956802
42.2922	0.651191	0.45452	0.811799	0.342633	0.988826
42.4732	NaN	0.188629	0.916908	0.0573482	1.00827
43.0161	0.582176	0.411496	0.72633	0.25027	0.887671
43.3781	0.633214	0.466895	0.807862	0.301816	0.970418
43.7401	0.763028	0.577996	0.958317	0.406249	1.12025
44.1019	0.746432	0.576938	0.92636	0.41544	1.09398
44.2828	0.695245	0.546793	0.839086	0.379083	0.985888
44.4638	NaN	NaN	NaN	NaN	NaN
44.8259	NaN	0.181841	1.08997	0.0211126	1.30379
45.5498	0.711419	0.491694	0.910356	0.301175	1.0724
45.912	0.67311	0.497509	0.858968	0.316987	1.02252
46.274	0.637171	0.471974	0.802003	0.30907	0.963186
47.179	0.650434	0.483158	0.815156	0.349538	0.987536
47.5409	NaN	0.321267	1.06917	-0.108124	1.32561
47.9027	0.647716	0.477848	0.808055	0.333484	0.973095
48.0837	0.936886	0.59884	1.14767	0.382296	1.30466
48.4456	0.766467	0.547582	1.05473	0.390384	1.24775
48.8076	0.580294	0.41517	0.745825	0.250113	0.931394
49.1696	0.6501	0.471323	0.828919	0.281614	1.00112
49.8937	0.519744	0.291819	0.753687	0.0956888	0.940319
50.6177	0.565661	0.347035	0.751541	0.115906	0.908831
50.9796	0.66246	0.418541	0.937964	0.228488	1.13267
51.5225	0.789096	0.465088	1.00896	0.236886	1.15756
51.7035	0.581588	0.370077	0.900347	0.205425	1.11716
52.0654	0.82771	0.472785	1.06812	0.246784	1.21743
52.4274	0.961046	0.744703	1.15171	0.532478	1.3269
52.7893	0.836548	0.632558	1.07732	0.451552	1.27474
52.9703	0.755012	0.579738	0.917479	0.427556	1.07477
53.3322	0.601622	0.424468	0.800384	0.251315	0.994231
53.8752	1.19914	0.532949	1.41038	0.325687	1.58923
54.2372	1.12234	0.924194	1.3416	0.767337	1.53483
54.5991	0.879694	0.603802	1.09912	0.344092	1.26755
54.961	0.653915	0.436541	0.91399	0.259074	1.16253
55.142	0.553674	0.379484	0.710275	0.216349	0.880889
55.323	NaN	NaN	NaN	NaN	NaN
55.8659	NaN	0.388508	1.15347	0.208858	1.26043
56.2278	0.780287	0.620198	0.952404	0.470302	1.09005
56.7707	NaN	NaN	NaN	NaN	NaN
57.1327	NaN	0.300406	1.24197	0.0842575	1.42094
60.9335	0.832541	0.579369	1.05221	0.370378	1.2213
61.2954	0.937362	0.780166	1.09717	0.604366	1.23996
61.8384	NaN	0.740235	0.881069	0.740235	0.881069
62.3814	NaN	0.411562	1.1481	0.30822	1.34498
62.7434	0.776862	0.613108	0.94175	0.448556	1.09508
63.1054	NaN	0.260962	0.992141	0.0998514	1.23864
63.4674	0.362625	0.167888	0.623558	-0.0153894	0.852149
64.1914	0.269513	0.111628	0.420555	-0.0187326	0.598101
64.3723	NaN	0.878491	1.09961	0.878491	1.09961
64.9152	NaN	0.600157	1.34067	0.472074	1.45871
65.2771	0.613006	0.379874	0.975501	0.212592	1.21661
65.6391	0.963333	0.508511	1.18443	0.257544	1.35562
66.0012	0.52654	0.310006	1.07383	0.124603	1.2978
68.6634	NaN	0.0326357	0.766918	-0.156876	0.896223
69.2549	0.197609	0.00838395	0.44956	-0.167171	0.653464
71.917	0.139108	-0.019444	0.301196	-0.169997	0.456746
74.5793	0.142789	-0.0191315	0.318145	-0.138877	0.486964
75.1709	NaN	NaN	NaN	NaN	NaN
76.9457	NaN	NaN	NaN	NaN	NaN
77.8329	NaN	0.502303	1.24656	0.365405	1.45797
79.9033	NaN	0.502303	1.24656	0.365405	1.45797
80.1991	0.550832	0.335464	0.871759	0.154933	1.08273
81.0865	-0.0591755	-0.251187	0.322096	-0.419904	0.614202
83.7491	-0.092138	-0.258111	0.0761359	-0.415809	0.249026
84.0449	-0.0843847	-0.254504	0.0676834	-0.401411	0.25163
86.1153	-0.0906455	-0.245496	0.0618962	-0.422076	0.215738
86.411	NaN	NaN	NaN	NaN	NaN
87.0025	NaN	-0.415938	0.351942	-0.506161	0.419475
89.2479	NaN	-0.415938	0.351942	-0.506161	0.419475
90.2102	0.16724	-0.061443	0.402674	-0.267404	0.598576
92.4556	0.271975	0.058017	0.464761	-0.148275	0.637467
93.4178	0.132857	-0.0610971	0.376404	-0.21632	0.583458
96.3048	NaN	-0.326027	0.421539	-0.447801	0.539471
96.6255	0.0270945	-0.259582	0.317876	-0.457318	0.54683
98.8708	0.234697	-0.0143898	0.436905	-0.237655	0.615247
99.1915	-0.139661	-0.36509	0.33111	-0.520475	0.570269
99.833	0.263908	-0.0262313	0.545101	-0.37515	0.762355
103.682	0.24957	0.0330153	0.588857	-0.128649	0.789465
104.003	0.158851	-0.00615598	0.321396	-0.167593	0.494414
104.645	0.317319	0.12288	0.498437	-0.0766124	0.661876
105.286	0.288962	0.120403	0.455135	-0.0355369	0.636175
105.928	0.290613	0.129885	0.438	-0.0333799	0.587524
106.569	0.248136	0.0595371	0.412176	-0.0991846	0.571499
108.494	0.267597	0.0910662	0.438149	-0.0865505	0.601505
109.456	0.311741	0.144327	0.476926	-0.00114497	0.625505
110.098	NaN	0.294331	1.03513	0.160349	1.14481
112.022	0.652826	0.476343	0.806362	0.315643	0.970558
112.343	NaN	-0.139031	0.667744	-0.337352	0.875895
115.229	0.256888	0.105791	0.42513	-0.0617632	0.594141
115.871	0.24602	0.107643	0.413853	-0.0613836	0.581973
117.154	NaN	-0.505359	0.713844	-0.684473	0.89849
118.437	0.25024	-0.14421	0.481879	-0.38265	0.64536
118.758	0.0352628	-0.174484	0.374367	-0.329307	0.596747
119.72	0.0183193	-0.154351	0.190984	-0.300606	0.350945
121.324	0.270378	0.0389909	0.484466	-0.164291	0.651041
122.286	0.20432	0.0190884	0.41195	-0.151982	0.57248
122.927	-0.0632178	-0.242392	0.160069	-0.432059	0.383451
123.569	-0.088674	-0.243196	0.0706754	-0.397479	0.242545
124.21	-0.0497013	-0.210317	0.102615	-0.357809	0.246708
124.852	NaN	-0.387238	0.319988	-0.563806	0.456453
125.493	-0.0165119	-0.18556	0.127255	-0.333952	0.255586
126.135	NaN	-0.361375	0.651328	-0.449462	0.787241
127.418	0.234586	-0.0337255	0.436199	-0.253207	0.620867
128.059	-1.0897	-1.30047	0.355444	-1.46344	0.54636
128.701	0.273793	-1.20508	0.477918	-1.41623	0.647023
129.342	0.509724	0.318091	0.692625	0.163519	0.88069
129.984	0.786889	0.550928	0.992109	0.341356	1.15783
130.625	0.826192	0.661041	0.996494	0.507211	1.15678
131.588	0.829861	0.668199	0.995538	0.521656	1.15433
132.55	0.928118	0.753391	1.11001	0.594689	1.26452
133.192	0.791593	0.59073	1.01828	0.440695	1.2239
133.833	0.947711	0.688361	1.14701	0.501472	1.33499
134.475	1.14438	0.954788	1.30752	0.777473	1.48523
135.116	0.957394	0.750309	1.21201	0.578733	1.46367
135.758	0.973717	0.789672	1.14797	0.625542	1.29298
136.399	0.794305	0.598073	1.03656	0.439262	1.25262
137.041	0.798177	0.600288	1.02083	0.426321	1.24787
137.682	0.989177	0.740533	1.22034	0.499202	1.47216
138.003	1.25634	1.03341	1.46044	0.814917	1.63755
138.216	0.808197	0.58362	1.35079	0.395296	1.58848
138.641	0.892941	0.67092	1.09331	0.462511	1.27344
139.067	0.799796	0.605333	1.00579	0.446055	1.21233
139.492	0.796752	0.633566	0.964252	0.479731	1.12229
139.917	1.01818	0.794818	1.20488	0.612155	1.37871
140.343	0.935123	0.748067	1.13793	0.564053	1.32039
140.768	0.791012	0.615421	0.953583	0.455549	1.13324
141.194	0.642547	0.47626	0.820297	0.308523	0.981127
141.619	0.918906	0.586215	1.14064	0.361694	1.29618
142.044	1.0759	0.914718	1.24301	0.759694	1.40536
142.47	0.766355	0.55739	1.10217	0.3821	1.32536
142.895	0.831297	0.628172	1.02363	0.422345	1.19088
143.32	0.841093	0.660036	1.01638	0.492406	1.16477
143.746	0.74317	0.562471	0.898654	0.415651	1.09089
144.171	0.639973	0.476433	0.808607	0.320143	0.973975
144.596	0.76691	0.571703	0.958399	0.395207	1.12149
147.361	0.727395	0.557895	0.894039	0.395807	1.06072
147.786	0.829939	0.635507	1.01538	0.450358	1.1606
148.637	0.598761	0.345168	0.869781	0.146407	1.08087
150.764	NaN	0.318175	1.08594	0.170776	1.18438
150.976	0.537921	0.33959	0.743407	0.168735	0.953241
151.402	0.393623	0.222946	0.561615	0.077221	0.71702
151.827	0.502976	0.306294	0.677091	0.119242	0.847718
152.252	0.53796	0.373816	0.695343	0.20851	0.844218
152.89	0.610096	0.448152	0.776364	0.227926	0.940001
153.528	0.671852	0.50922	0.832709	0.356533	1.006
153.954	0.492969	0.281358	0.706608	0.0903475	0.917305
154.379	0.484936	0.314766	0.662192	0.152873	0.83795
154.805	0.5717	0.412713	0.734839	0.260364	0.886997
155.23	0.651034	0.482655	0.819009	0.298918	0.968676
155.655	0.903326	0.643288	1.09988	0.414916	1.26621
156.081	0.784151	0.59313	0.983372	0.419504	1.19854
156.931	0.747418	0.58487	0.910126	0.423084	1.07386
157.144	0.566696	0.358006	0.795032	0.168798	0.995282
157.782	0.366764	0.180815	0.5374	-0.00258086	0.706779
158.208	0.499367	0.295665	0.691868	0.0922791	0.848655
158.633	0.537975	0.379558	0.701763	0.222994	0.854542
158.846	0.343019	0.16995	0.558913	-0.00414357	0.765114
159.058	0.652904	0.259381	0.875932	0.0494367	1.0338
159.484	0.617917	0.449069	0.811844	0.281694	0.984431
159.909	0.460352	0.293489	0.630448	0.131924	0.79901
160.334	0.321909	0.14982	0.504183	-0.00800899	0.652368
160.76	0.303951	0.140021	0.465052	-0.00987212	0.631606
161.185	0.648495	0.313845	0.866146	0.084361	1.03944
161.611	0.189815	-0.0452972	0.69901	-0.224579	0.961082
162.461	0.186718	-0.0120095	0.377623	-0.200272	0.565211
162.887	0.266883	0.103465	0.424619	-0.0545883	0.578167
163.312	0.578722	0.251089	0.803427	0.0345919	0.979321
163.738	0.443289	0.242571	0.707356	0.0606989	0.930352
164.163	0.309746	0.146846	0.479655	0.000191705	0.646856
164.588	0.499434	0.258691	0.69462	0.0730825	0.859491
165.014	0.523694	0.35599	0.681193	0.209077	0.831729
165.439	0.513486	0.344748	0.667234	0.184177	0.821097
165.864	0.459357	0.290391	0.63433	0.140582	0.791667
166.29	0.387937	0.224049	0.562473	0.0610666	0.703261
166.715	0.300735	0.135934	0.478338	-0.0145228	0.629061
167.14	0.520302	0.258882	0.731916	0.0467236	0.897462
167.566	0.290696	0.065642	0.622665	-0.1098	0.845006
167.991	0.660896	0.175856	0.884995	-0.0729116	1.06687
168.417	0.658901	0.494617	0.834604	0.321498	1.01765
168.842	0.258236	0.0341064	0.626125	-0.149517	0.82706
169.267	0.107014	-0.0547117	0.269476	-0.202454	0.428785
169.693	0.283278	0.0525475	0.480385	-0.13468	0.675042
170.118	0.305224	0.147073	0.469299	-0.0262912	0.631333
170.543	0.65604	0.26034	0.867251	0.0438723	1.03201
172.245	0.459327	0.264306	0.681353	0.101165	0.925834
173.521	0.408246	0.234722	0.571651	0.0750543	0.71631
173.946	0.409299	0.239007	0.575265	0.0524185	0.721401
174.159	0.44108	0.288896	0.619821	0.13226	0.772342
174.371	0.478779	0.320133	0.649288	0.165842	0.814613
174.797	0.358342	0.18265	0.554794	0.0313622	0.742234
175.222	0.309358	0.152834	0.466573	0.00155859	0.628964
176.073	0.322053	0.16241	0.48055	0.00953868	0.613258
176.498	0.26506	0.0983084	0.431853	-0.0604011	0.58586
176.924	0.387788	0.181508	0.613639	0.00704573	0.826298
178.625	0.412736	0.213	0.624771	0.0402827	0.820157
179.05	0.314671	0.152794	0.487888	0.0162116	0.62545
179.476	0.464858	0.255652	0.652706	0.0769491	0.82963
179.901	0.530771	0.376985	0.682381	0.215031	0.83607
181.177	0.297224	0.114834	0.515312	-0.0497351	0.71756
182.453	0.23822	0.0752472	0.406553	-0.0863501	0.573339
182.878	0.22316	0.0694146	0.38515	-0.0922924	0.54191
183.304	0.302524	0.0225646	0.914006	-0.168225	1.11711
184.579	0.770052	0.0732266	0.984048	-0.120724	1.16326
185.005	0.456042	0.229043	0.880729	0.0720491	1.08881
185.511	0.273598	0.103321	0.455954	-0.0567448	0.614568
186.018	0.145514	-0.0407779	0.323459	-0.209227	0.499481
186.525	0.297666	0.0554132	0.493019	-0.170441	0.65992
187.031	0.212883	-0.164442	0.455377	-0.364803	0.638868
188.804	-0.0219021	-0.235284	0.36133	-0.413366	0.619043
189.564	0.683122	-0.137118	0.930158	-0.346861	1.11132
190.071	0.367183	0.14579	0.818507	-0.0362722	1.07319
190.578	0.284185	0.124289	0.442203	-0.0296898	0.615819
191.084	0.17338	-0.00672143	0.35313	-0.16728	0.555074
191.591	0.281568	0.0416479	0.534245	-0.147716	0.724663
192.098	0.210273	0.0043747	0.47826	-0.185875	0.704814
192.351	0.112089	-0.0577877	0.275276	-0.204601	0.426231
192.604	0.32905	0.0768679	0.530883	-0.113003	0.686155
193.111	0.392141	0.22792	0.554404	0.0779242	0.687299
194.124	0.353261	0.182876	0.520007	0.0328452	0.672883
195.137	0.329153	0.152638	0.505576	-0.00720002	0.670476
196.657	0.291321	0.0774613	0.502237	-0.0956096	0.71063
197.417	0.239066	0.0353748	0.472061	-0.129018	0.710522
197.671	0.132118	-0.0316022	0.292383	-0.174205	0.449627
198.177	0.0844547	-0.0731586	0.250481	-0.231357	0.394283
198.684	-0.0251564	-0.23141	0.169741	-0.426312	0.348787
199.951	-0.00181896	-0.209482	0.188696	-0.404742	0.365781
200.204	0.0142596	-0.143661	0.169236	-0.331857	0.317485
200.711	-0.189641	-0.386922	0.0266718	-0.539566	0.203969
201.217	0.13312	-0.272074	0.343326	-0.488325	0.500703
201.977	0.0668483	-0.136824	0.27284	-0.299425	0.466283
202.737	0.496869	-0.0207185	0.716687	-0.252504	0.883064
203.244	0.356943	0.154137	0.608238	-0.00935364	0.847626
203.75	-0.0578927	-0.39609	0.233862	-0.592651	0.459032
205.27	-0.250596	-0.466154	0.0440824	-0.62793	0.282507
205.777	0.180255	-0.213524	0.362511	-0.53085	0.522794
207.297	0.224839	0.0689943	0.3846	-0.100898	0.521649
207.804	0.0522253	-0.133975	0.257448	-0.308313	0.455938
208.31	0.0890681	-0.0963561	0.264131	-0.252509	0.43505
208.817	0.718142	0.129175	0.947539	-0.0796688	1.13417
209.324	0.189703	-0.0019264	0.760007	-0.175321	1.03667
210.337	0.123469	-0.030926	0.275183	-0.183645	0.434395
210.844	0.284806	0.08798	0.475029	-0.0867007	0.643265
211.35	0.110988	-0.101835	0.367142	-0.270484	0.601584
211.857	0.102876	-0.0801867	0.274601	-0.239038	0.449186
212.363	0.04108	-0.127299	0.212171	-0.306073	0.391406
212.87	0.0532821	-0.118715	0.211856	-0.284343	0.362884
213.377	0.252232	0.0385926	0.463137	-0.167228	0.615069
213.883	0.178919	-0.00119451	0.39063	-0.161465	0.578878
214.39	0.0570798	-0.103439	0.21862	-0.279146	0.404841
214.897	-0.0136316	-0.18735	0.14528	-0.340786	0.293308
215.403	-0.0259905	-0.19273	0.133004	-0.354192	0.28017
215.91	-0.0305735	-0.19553	0.134049	-0.35416	0.287702
216.417	NaN	0.0538911	0.768153	-0.115255	0.980422
216.923	0.456224	0.288602	0.609918	0.13517	0.771856
217.43	0.473671	0.323495	0.632165	0.178085	0.795082
217.937	NaN	-0.0059534	0.74436	-0.152455	0.874536
218.444	0.448622	0.261056	0.608701	0.1044	0.757833
218.95	0.481223	0.299543	0.638328	0.15299	0.795289
219.71	NaN	0.218808	0.642199	0.218808	0.642199
220.47	NaN	0.142404	0.864149	-0.0694025	1.03615
220.977	0.653961	0.47105	0.826597	0.299787	0.985645
221.484	0.707479	0.53694	0.854739	0.369791	1.00906
222.244	NaN	0.606719	1.36492	0.458978	1.54488
223.004	0.670627	0.466343	1.01526	0.307212	1.24188
223.531	0.633248	0.469171	0.798171	0.322982	0.949089
224.058	0.856175	0.659165	1.04002	0.464675	1.22065
225.113	0.878809	0.708533	1.04634	0.541229	1.23019
225.377	0.646002	0.462812	0.869694	0.281501	1.066
225.904	0.291294	0.0940336	0.588294	-0.0719636	0.793501
226.431	0.621178	0.193578	0.860679	-0.01276	1.02418
226.958	0.800159	0.551626	1.04378	0.369374	1.24232
228.277	0.907773	0.617623	1.109	0.402588	1.2803
228.804	0.591867	0.376266	1.00186	0.209728	1.22558
229.331	0.754382	0.465524	0.981239	0.256081	1.17817
229.858	0.510926	0.305029	0.870822	0.139758	1.13594
230.386	0.65272	0.395835	0.854334	0.184602	1.04517
230.913	0.457687	0.252698	0.742962	0.0845029	0.952675
231.44	0.325369	0.15842	0.480898	-0.0118291	0.644742
231.967	0.0913775	-0.107319	0.327144	-0.294069	0.541781
232.495	0.0846255	-0.0823385	0.26089	-0.257731	0.41098
233.022	0.200453	0.0252963	0.363603	-0.133285	0.541106
233.549	0.310426	0.130661	0.484074	-0.0374929	0.665924
234.077	0.264279	0.101816	0.437461	-0.0504733	0.599527
234.604	0.221526	0.0681399	0.391722	-0.0829369	0.546413
235.395	NaN	-0.547803	0.180393	-0.547803	0.180393
236.186	NaN	-0.512597	0.24503	-0.617993	0.343378
236.713	0.19837	-0.128258	0.405093	-0.338366	0.596893
237.24	0.306898	0.146714	0.466178	-0.0102437	0.623224
237.767	0.00824315	-0.211145	0.317394	-0.394646	0.530519
238.294	0.0972466	-0.164668	0.370352	-0.352765	0.55622
238.821	NaN	-0.0614786	0.647935	-0.225867	0.823864
239.085	0.29997	0.140828	0.475594	-0.0220588	0.608392
239.612	NaN	-0.2535	0.537234	-0.356628	0.63791
240.14	0.652844	0.153935	0.858607	-0.0753136	1.04983
241.458	NaN	0.374335	1.1351	0.175076	1.16262
241.985	0.728209	0.576838	0.90052	0.413187	1.07071
242.512	0.712977	0.554778	0.891074	0.407594	1.04734
244.094	NaN	-0.0434177	0.736095	-0.317498	1.01391
246.73	0.351128	0.183559	0.534254	0.0126114	0.688779
247.258	0.415116	0.137639	0.620606	-0.0861105	0.792779
248.312	0.219292	0.00672088	0.542784	-0.174533	0.747677
248.839	0.433723	0.102023	0.647968	-0.130186	0.836921
249.367	0.520833	0.35554	0.675478	0.199912	0.827383
249.894	0.447057	0.262771	0.599538	0.0837031	0.752827
250.422	0.384796	0.213621	0.541343	0.0486521	0.697708
250.949	0.368367	0.205185	0.53565	0.0353958	0.686047
251.74	NaN	NaN	NaN	NaN	NaN
252.003	NaN	-0.0515665	0.674934	-0.172746	0.805697
252.382	0.251163	0.0845226	0.415774	-0.0629822	0.566302
252.761	0.289403	0.114581	0.448699	-0.0488372	0.599071
253.14	0.284188	0.132042	0.453585	-0.0225289	0.61288
253.519	0.327615	0.165252	0.500099	-0.00521695	0.631352
253.897	0.28374	0.115019	0.456287	-0.0327637	0.599781
254.276	0.252864	0.0908257	0.405627	-0.0505781	0.553362
254.655	NaN	NaN	NaN	NaN	NaN
255.034	NaN	NaN	NaN	NaN	NaN
255.602	NaN	NaN	NaN	NaN	NaN
255.792	NaN	NaN	NaN	NaN	NaN
256.17	NaN	NaN	NaN	NaN	NaN
256.549	NaN	0.484734	1.22799	0.369263	1.37723
257.686	NaN	0.484734	1.22799	0.369263	1.37723
258.064	0.826904	0.667035	0.993001	0.516378	1.16982
258.443	NaN	NaN	NaN	NaN	NaN
259.58	NaN	NaN	NaN	NaN	NaN
259.959	NaN	NaN	NaN	NaN	NaN
260.337	NaN	-0.0559687	0.701218	-0.178358	0.872933
260.716	0.57882	0.295557	0.795326	0.0904868	0.940667
261.095	0.663749	0.498554	0.834152	0.336992	0.967541
261.474	NaN	NaN	NaN	NaN	NaN
261.853	NaN	NaN	NaN	NaN	NaN
262.61	NaN	NaN	NaN	NaN	NaN
263.368	NaN	NaN	NaN	NaN	NaN
264.694	NaN	NaN	NaN	NaN	NaN
265.073	NaN	NaN	NaN	NaN	NaN
265.641	NaN	-0.276152	0.447183	-0.428	0.651515
266.399	0.0866146	-0.0756639	0.245396	-0.222728	0.386521
268.104	NaN	NaN	NaN	NaN	NaN
268.483	NaN	NaN	NaN	NaN	NaN
268.862	NaN	NaN	NaN	NaN	NaN
269.241	NaN	NaN	NaN	NaN	NaN
269.999	NaN	NaN	NaN	NaN	NaN
270.188	NaN	NaN	NaN	NaN	NaN
270.756	NaN	0.0538628	0.790036	-0.0604475	0.906073
271.514	0.439732	0.262596	0.591934	0.102727	0.76112
271.893	NaN	NaN	NaN	NaN	NaN
272.082	NaN	NaN	NaN	NaN	NaN
272.65	NaN	-0.38098	0.424757	-0.619204	0.567824
277.954	NaN	NaN	NaN	NaN	NaN
278.144	NaN	-0.306092	0.334971	-0.306092	0.334971
278.712	NaN	-0.304024	0.470266	-0.484998	0.567824
279.091	-0.00141171	-0.161809	0.168212	-0.321549	0.339383
279.47	-0.0196745	-0.171841	0.145845	-0.344148	0.288661
279.849	-0.00343798	-0.151404	0.171439	-0.334659	0.298446
280.417	NaN	-0.258441	0.495616	-0.346137	0.625436
280.796	-0.248168	-0.473689	0.122504	-0.669155	0.376921
281.175	0.269534	-0.36856	0.494578	-0.584358	0.661694
281.743	0.0542322	-0.167007	0.387453	-0.343051	0.616356
282.312	-0.0630274	-0.209274	0.108238	-0.353401	0.299916
282.69	NaN	0.142862	0.904895	-0.0868839	1.08249
283.258	0.540988	0.378286	0.708468	0.242231	0.865055
283.637	NaN	0.123653	0.907257	-0.00443615	1.10345
284.206	0.423615	0.232667	0.612683	0.036845	0.793606
285.153	0.440827	0.25959	0.634813	0.0520747	0.805509
285.531	0.288543	0.0859872	0.54269	-0.0724266	0.753585
286.1	0.351673	0.0947254	0.609825	-0.114547	0.785694
286.858	0.229057	0.000122258	0.546511	-0.174681	0.763464
287.236	0.108047	-0.0531339	0.284315	-0.20164	0.443994
287.426	NaN	0.0876778	0.894987	-0.252675	1.18138
289.131	0.517059	0.332147	0.697668	0.171707	0.860273
289.32	0.520676	0.288588	0.837608	0.0921083	1.06491
290.646	0.561009	0.34817	0.857046	0.164482	1.06423
290.836	0.371437	0.201219	0.543979	0.0364327	0.7066
291.215	0.431827	0.201831	0.720628	0.0264416	0.911865
292.73	0.574693	0.277038	0.79064	0.0540316	0.947929
293.109	0.665511	0.50706	0.827347	0.343725	0.969061
293.677	NaN	0.387237	1.13452	0.199653	1.25497
294.435	0.772275	0.59418	0.911973	0.46084	1.06609
294.624	NaN	-0.223798	0.513497	-0.360617	0.664034
295.003	0.133868	-0.0322708	0.277787	-0.175855	0.441521
296.646	NaN	0.0407609	0.819291	-0.111992	0.91157
297.796	0.433095	0.288055	0.604229	0.103435	0.771766
298.289	NaN	-0.14453	0.637144	-0.370834	0.820175
299.439	NaN	-0.143861	0.630751	-0.370834	0.820175
299.932	0.240147	0.0672225	0.387332	-0.099963	0.5459
301.082	NaN	NaN	NaN	NaN	NaN
301.574	NaN	-0.257753	0.532662	-0.297584	0.684991
303.218	0.516288	0.116857	0.741881	-0.0843067	0.905744
304.86	0.475544	0.0911079	0.723262	-0.119098	0.905734
306.01	0.242607	0.0180749	0.630383	-0.158181	0.848199
306.503	0.485569	0.218492	0.667157	-0.0444651	0.841854
308.146	0.543724	0.381149	0.703408	0.226507	0.857543
308.639	0.239305	0.0478691	0.487642	-0.132386	0.739571
309.789	0.171435	-0.00454241	0.334572	-0.162298	0.495286
310.282	0.233696	0.0595781	0.398815	-0.105026	0.563785
311.103	0.274459	0.107532	0.429365	-0.056828	0.597102
311.432	0.277344	0.121489	0.445203	-0.0418255	0.614717
312.582	0.280407	0.120188	0.449602	-0.0443907	0.607471
313.075	-0.0445015	-0.233944	0.202573	-0.402868	0.467088
314.389	-0.0886489	-0.255149	0.0692729	-0.420602	0.218956
314.718	0.0458383	-0.156718	0.279148	-0.343011	0.484403
316.032	0.0371519	-0.15031	0.256843	-0.324895	0.467074
316.36	0.0172395	-0.280339	0.549468	-0.47736	0.747287
317.674	0.401425	-0.230931	0.623768	-0.454106	0.780085
318.003	0.00348526	-0.238985	0.514363	-0.420419	0.739194
319.923	NaN	-0.498239	0.236843	-0.658385	0.369535
320.403	-0.206386	-0.385074	-0.0230658	-0.531495	0.13669
322.803	-0.245229	-0.403459	-0.0893857	-0.548163	0.0877781
323.523	NaN	NaN	NaN	NaN	NaN
325.203	NaN	NaN	NaN	NaN	NaN
325.923	NaN	NaN	NaN	NaN	NaN
327.603	NaN	NaN	NaN	NaN	NaN
328.323	NaN	-0.722186	0.047261	-0.802979	0.147456
330.003	-0.361953	-0.512331	-0.192801	-0.661222	-0.0745434
331.683	NaN	NaN	NaN	NaN	NaN
332.403	NaN	-0.399021	0.32115	-0.587434	0.449568
333.603	-0.00934282	-0.352053	0.631593	-0.546843	0.843382
334.563	-0.194338	-0.427012	0.600654	-0.590715	0.820076
334.803	0.175386	-0.38506	0.852014	-0.561947	1.04288
335.283	NaN	0.386573	1.13282	0.155176	1.26644
335.523	1.11439	0.748811	1.3352	0.51824	1.51132
336.483	0.890204	0.680019	1.1471	0.493019	1.40618
337.203	0.807167	0.628122	0.98046	0.458392	1.15042
337.443	1.03486	0.744794	1.25388	0.53553	1.41536
338.163	NaN	0.775993	1.49715	0.639003	1.70448
338.402	1.05995	0.708044	1.32294	0.511918	1.50287
339.123	1.14609	0.742753	1.37026	0.513392	1.52454
339.363	0.421611	0.203339	1.26498	0.0397084	1.48268
339.603	0.809838	0.308185	1.04788	0.0972464	1.21947
340.323	1.06363	0.864623	1.24059	0.673341	1.40721
341.283	1.07647	0.905008	1.24384	0.753316	1.40724
342.003	1.08379	0.914004	1.25298	0.753135	1.41549
342.195	1.19001	0.758978	1.41521	0.498986	1.58612
342.966	0.804344	0.582019	1.34194	0.407873	1.56458
343.352	1.16352	0.751465	1.36016	0.489521	1.53678
343.737	1.20194	1.03376	1.37361	0.890942	1.53599
343.93	1.31418	1.11202	1.49589	0.932845	1.68831
344.508	1.20718	1.02062	1.41309	0.851608	1.61817
345.279	0.966301	0.780475	1.17883	0.626973	1.35232
345.858	0.877313	0.738557	1.03675	0.598212	1.22411
346.05	NaN	0.601013	1.35414	0.482536	1.4817
346.821	0.943527	0.804397	1.1147	0.663123	1.26097
347.207	NaN	0.634264	1.43379	0.432295	1.61758
347.592	0.994099	0.819857	1.16821	0.653352	1.34949
347.785	1.00393	0.820464	1.16878	0.676786	1.31601
348.364	0.952162	0.788743	1.11822	0.620383	1.2649
349.135	0.926366	0.767824	1.09165	0.617845	1.22984
349.713	0.914033	0.755527	1.0847	0.626875	1.22647
349.906	0.840839	0.407539	1.04002	0.169621	1.19319
350.677	0.459627	0.242508	0.926337	0.0859376	1.14772
351.063	0.348717	0.198554	0.512609	0.0353106	0.686181
351.448	NaN	NaN	NaN	NaN	NaN
351.641	NaN	0.311482	1.07812	0.167231	1.32431
352.219	0.633207	0.0522025	0.92867	-0.14942	1.12709
352.99	0.203137	-0.00994735	0.875361	-0.186613	1.10267
353.183	0.823146	0.172788	1.04113	-0.0962101	1.22294
353.569	0.930034	0.764388	1.10248	0.60105	1.26518
353.761	1.03353	0.864703	1.18979	0.707356	1.34489
354.147	1.06111	0.898545	1.20721	0.74072	1.37587
355.303	NaN	NaN	NaN	NaN	NaN
356.653	NaN	NaN	NaN	NaN	NaN
357.231	NaN	NaN	NaN	NaN	NaN
358.581	NaN	NaN	NaN	NaN	NaN
359.159	NaN	NaN	NaN	NaN	NaN
360.509	NaN	NaN	NaN	NaN	NaN
361.087	NaN	0.314872	1.06997	0.173957	1.13923
363.207	0.658351	0.510663	0.817427	0.39338	1.00327
365.135	NaN	-0.546079	0.511083	-0.72956	0.655836
366.292	0.133185	-0.21299	0.338389	-0.41574	0.495625
366.87	0.179196	-0.295876	0.463998	-0.502854	0.665681
368.219	0.300027	-0.263829	0.532868	-0.47816	0.705315
368.797	0.411166	0.242555	0.576953	0.102672	0.709473
370.725	NaN	NaN	NaN	NaN	NaN
370.918	NaN	NaN	NaN	NaN	NaN
372.653	NaN	NaN	NaN	NaN	NaN
374.58	NaN	0.201548	0.907959	0.121178	1.14115
376.508	-0.0589032	-0.282278	0.545312	-0.461674	0.75198
378.435	-0.18221	-0.33724	-0.0226769	-0.50899	0.155033
380.363	NaN	NaN	NaN	NaN	NaN
381.134	NaN	-0.380449	0.334326	-0.46228	0.657853
382.291	0.0334204	-0.176026	0.247545	-0.348209	0.436756
384.218	0.106456	-0.116683	0.308666	-0.312197	0.472355
384.797	0.158346	-0.410799	0.498631	-0.611273	0.698455
386.146	0.350212	-0.376176	0.575649	-0.57545	0.744538
386.724	0.477484	0.325202	0.63582	0.150796	0.778551
388.074	0.488792	0.345942	0.642092	0.186767	0.791829
388.845	NaN	-0.18851	0.530597	-0.33194	0.747801
389.616	0.179271	0.00938797	0.345779	-0.139521	0.502406
390.001	-0.0298202	-0.23469	0.209875	-0.399084	0.425257
392.032	0.215162	-0.118572	0.424579	-0.346514	0.599343
393.386	0.183378	-0.010588	0.371686	-0.156931	0.560929
394.74	-0.0577429	-0.252713	0.164795	-0.42248	0.358125
396.77	-0.457572	-0.792628	-0.163327	-0.990197	0.0607128
398.463	-0.459546	-0.77641	-0.249469	-0.971799	-0.0756798
398.801	-0.325737	-0.474947	-0.155961	-0.627623	-0.0201085
400.155	-0.289018	-0.72319	-0.0894093	-0.98902	0.0882797
401.509	-0.670064	-0.894404	-0.179856	-1.08379	0.061786
402.186	-0.358775	-0.792341	-0.143018	-1.03206	0.0334272
403.539	-0.309764	-0.476387	-0.153306	-0.63059	0.0103889
406.924	-0.134658	-0.365949	0.0678202	-0.56793	0.210708
410.308	-0.282913	-0.484461	-0.0255564	-0.653286	0.165739
412.339	-0.376066	-0.539757	-0.217896	-0.653744	-0.0494866
412.678	NaN	-0.501424	0.26595	-0.610558	0.47719
413.693	0.199813	-0.121908	0.414155	-0.344449	0.582243
415.047	0.303807	0.149491	0.472003	-0.0201202	0.643624
415.385	NaN	NaN	NaN	NaN	NaN
417.078	NaN	-0.553404	0.184789	-0.684304	0.295302
419.108	-0.179888	-0.357723	-0.0338506	-0.513186	0.103807
419.447	NaN	-0.0321467	0.702685	-0.133925	0.839016
420.462	0.511554	0.300919	0.68672	0.0883219	0.853372
421.816	0.574323	0.416432	0.721685	0.273075	0.869536
422.493	NaN	NaN	NaN	NaN	NaN
423.847	NaN	0.869905	1.60352	0.745106	1.91306
427.231	0.96988	0.74581	1.27343	0.554639	1.47911
430.616	1.043	0.834548	1.22902	0.592359	1.39911
432.647	1.11985	0.972518	1.26395	0.794338	1.4193
432.986	NaN	NaN	NaN	NaN	NaN
434.001	NaN	0.528169	1.25433	0.406863	1.32237
434.71	1.06124	0.840022	1.26012	0.644977	1.42822
435.774	1.0702	0.91629	1.25033	0.744259	1.42863
436.837	1.25022	1.0168	1.45477	0.805639	1.60945
437.546	1.17836	0.960146	1.44478	0.77709	1.60089
438.255	1.27529	1.01139	1.49268	0.81641	1.64462
438.61	0.931497	0.706014	1.37766	0.516936	1.60755
439.319	0.943077	0.765535	1.12377	0.576669	1.29398
440.028	0.798894	0.465016	1.34813	0.26577	1.59276
440.737	1.2927	0.532192	1.50945	0.307511	1.65048
441.091	0.946387	0.725796	1.41597	0.563645	1.6126
441.446	0.969923	0.79128	1.15434	0.616811	1.32529
442.155	1.11782	0.94633	1.29414	0.785686	1.45898
442.864	1.14665	0.994964	1.2985	0.822376	1.4646
443.573	0.950064	0.757131	1.15183	0.591075	1.35687
444.282	0.926513	0.75262	1.08711	0.587498	1.22464
444.636	0.753049	0.547262	0.979475	0.370128	1.16217
444.991	0.864264	0.641046	1.06611	0.431165	1.22626
445.7	0.999021	0.823593	1.16426	0.65556	1.31473
446.409	0.816694	0.618016	1.04526	0.441463	1.2423
447.118	0.964983	0.741577	1.15646	0.532668	1.32767
447.828	1.04855	0.879921	1.20655	0.710856	1.37025
448.182	1.04067	0.884647	1.20654	0.728225	1.36964
448.537	0.923479	0.760141	1.09463	0.589905	1.29594
449.246	1.02308	0.825075	1.23089	0.65153	1.40849
449.955	1.08587	0.919946	1.25413	0.759217	1.42289
450.664	1.10057	0.929504	1.28247	0.768323	1.44677
451.373	1.17042	0.986194	1.33845	0.812542	1.49465
451.728	1.2031	1.03553	1.35226	0.874679	1.49791
452.082	0.676541	0.44519	1.20158	0.269659	1.42109
452.792	0.906544	0.544184	1.11927	0.317429	1.2994
453.501	1.10006	0.923958	1.26501	0.763964	1.43425
454.21	0.775152	0.555442	1.15373	0.393825	1.38764
454.919	0.917121	0.637092	1.19596	0.442957	1.39163
455.628	0.854967	0.647437	1.14529	0.486205	1.35464
455.982	1.12121	0.752744	1.34473	0.531947	1.50855
456.337	0.931593	0.719658	1.24015	0.555922	1.45667
457.046	1.01093	0.794772	1.19987	0.605363	1.38066
457.755	1.08846	0.934049	1.24422	0.770762	1.38249
458.464	0.768247	0.574433	1.04908	0.400787	1.27439
459.173	0.704903	0.549766	0.867651	0.382496	1.02011
459.528	0.992978	0.691077	1.21082	0.487916	1.3859
459.882	0.895289	0.699164	1.11988	0.516303	1.33586
460.591	0.729567	0.552351	0.900084	0.419449	1.07177
461.3	0.705885	0.547756	0.876996	0.393539	1.01401
462.009	0.805626	0.468942	1.04223	0.196826	1.23855
462.718	0.54233	0.311492	0.986988	0.108073	1.18868
463.073	0.607621	0.391667	0.795334	0.173588	0.977961
463.428	0.655397	0.487281	0.826839	0.319958	0.995322
464.137	0.832685	0.55873	1.08077	0.380232	1.25422
464.846	NaN	0.641579	1.38296	0.50243	1.52596
465.2	1.09884	0.918517	1.26143	0.752393	1.4262
466.619	0.778492	0.548684	1.06561	0.357942	1.31329
468.037	0.800091	0.583034	0.998381	0.369915	1.1737
468.391	0.714416	0.534895	0.922949	0.357841	1.10153
468.746	0.615379	0.4424	0.767213	0.28459	0.934419
469.455	0.808017	0.563633	1.00966	0.340271	1.16005
470.164	0.986655	0.818556	1.1707	0.641684	1.31732
470.873	0.670715	0.443546	1.03937	0.269876	1.27017
471.582	0.545128	0.394547	0.71527	0.251253	0.885526
471.937	NaN	-0.0725701	0.70591	-0.299962	0.936701
472.292	0.242739	0.0843455	0.411727	-0.0676968	0.571165
473.001	0.431646	0.232145	0.607464	0.026467	0.781586
473.533	0.473242	0.311279	0.632794	0.157895	0.799277
473.71	0.241058	0.0297213	0.481882	-0.135373	0.71491
474.419	0.306455	0.117635	0.499364	-0.0636205	0.66266
475.128	0.312815	0.154368	0.490958	-0.0155833	0.652315
475.482	0.260927	0.0927547	0.426568	-0.0667433	0.589673
475.837	0.204399	0.035474	0.361164	-0.139447	0.523825
476.546	0.162797	0.0107986	0.326555	-0.157146	0.480063
477.255	0.186545	0.0257828	0.344696	-0.139695	0.490294
477.964	0.231345	0.0292007	0.449978	-0.153843	0.663261
478.673	0.363971	0.104914	0.567949	-0.0974061	0.750218
479.028	0.447116	0.278067	0.609973	0.120578	0.767753
479.382	0.343702	0.167696	0.517901	0.00860408	0.711104
480.092	0.21015	0.0317363	0.38173	-0.115538	0.525999
480.801	0.222052	0.0511282	0.386472	-0.0991663	0.543029
481.51	0.272826	0.111183	0.437669	-0.0429101	0.601184
482.219	0.275449	0.120668	0.447845	-0.0509547	0.591142
482.574	0.150515	-0.0392393	0.335771	-0.187782	0.499117
483.637	0.259886	0.0518871	0.443955	-0.165491	0.606621
484.346	0.161663	-0.0300913	0.371739	-0.197742	0.557602
485.055	-0.0316862	-0.206331	0.153949	-0.373568	0.313006
485.764	-0.058766	-0.212519	0.103033	-0.369138	0.259028
486.119	0.0232835	-0.141341	0.183936	-0.292695	0.334755
486.473	0.203794	0.00224059	0.39395	-0.194467	0.56537
487.182	-0.1613	-0.378661	0.276959	-0.565613	0.495648
487.891	0.0815472	-0.272783	0.284057	-0.504261	0.467083
488.601	0.0357155	-0.227635	0.318581	-0.411933	0.518537
489.31	0.182668	-0.156344	0.407806	-0.368126	0.58248
489.664	-0.132536	-0.34487	0.313748	-0.521879	0.52229
490.019	-0.113025	-0.298724	0.0830595	-0.484353	0.241232
490.728	-0.216613	-0.421244	0.0230447	-0.599464	0.237424
491.437	NaN	-0.726348	0.0382538	-0.995254	0.171938
491.791	-0.234102	-0.486426	0.185499	-0.668188	0.383846
492.5	-0.287067	-0.528173	0.145129	-0.682353	0.367105
492.677	-0.1769	-0.426599	0.0248053	-0.642003	0.197579
493.209	-0.165329	-0.334126	0.0158153	-0.483797	0.175798
493.918	-0.188955	-0.501316	0.193124	-0.704825	0.401852
494.628	-0.338252	-0.561889	0.172522	-0.752827	0.376525
494.805	0.0849396	-0.46942	0.297922	-0.683774	0.476459
495.337	0.0432291	-0.144644	0.234468	-0.294331	0.424225
496.046	0.00288459	-0.50368	0.676298	-0.717317	0.903885
496.578	-0.342278	-0.588213	0.645748	-0.753946	0.877226
496.755	-0.428219	-0.600601	-0.268427	-0.749572	-0.105518
497.464	-0.445204	-0.663565	0.268328	-0.844312	0.522387
498.173	0.212458	-0.585685	0.431221	-0.81914	0.602677
498.528	0.182004	-0.0144404	0.366273	-0.171521	0.571714
498.882	0.0228967	-0.149119	0.205849	-0.322543	0.385514
499.592	0.37244	-0.0289354	0.607414	-0.271661	0.746425
500.301	0.186812	-0.0236078	0.485292	-0.179924	0.71444
501.01	-0.161361	-0.380005	0.101328	-0.535021	0.313786
501.719	-0.257183	-0.415305	-0.0995966	-0.54402	0.0536171
502.074	NaN	-0.260871	0.477217	-0.360859	0.745682
502.428	0.128405	-0.0377495	0.301117	-0.203946	0.462189
503.137	0.0766847	-0.100783	0.273313	-0.280984	0.434024
503.492	0.089928	-0.0779906	0.257992	-0.258599	0.428913
503.846	0.430349	0.112489	0.656427	-0.112195	0.838227
504.201	0.21246	0.00776491	0.561057	-0.181632	0.794753
504.555	0.261009	0.0648542	0.440684	-0.136436	0.597107
504.91	0.157723	-0.021047	0.368415	-0.192438	0.538163
505.264	-0.0145737	-0.183303	0.165587	-0.332457	0.325048
505.619	-0.364451	-0.581539	-0.0524543	-0.761216	0.188074
505.973	0.0256873	-0.472366	0.2491	-0.714959	0.411005
506.328	0.383628	0.105685	0.59472	-0.0983042	0.753549
506.682	0.189083	-0.0236401	0.485855	-0.185043	0.71151
507.037	0.282942	0.0591473	0.470981	-0.150407	0.651348
507.391	0.229354	0.0483306	0.409233	-0.111828	0.57515
507.746	0.389866	0.0823816	0.688186	-0.0698588	0.861375
509.164	NaN	0.241984	0.98138	0.0663986	1.12921
509.873	0.590023	0.420906	0.754573	0.285563	0.920016
510.582	0.570211	0.399357	0.725852	0.262149	0.881754
510.937	0.337042	0.153049	0.592893	-0.0253117	0.772124
511.291	0.46054	0.220935	0.666526	0.0229195	0.845817
512.001	0.510252	0.34536	0.66705	0.213716	0.82755
513.099	0.467118	0.318061	0.623834	0.153878	0.779474
514.197	0.558192	0.382852	0.735628	0.215017	0.923521
515.295	0.635522	0.459177	0.806581	0.282204	0.994665
515.844	0.319946	0.090585	0.690918	-0.0726933	0.931103
516.393	0.262204	0.090585	0.425399	-0.0687431	0.571346
517.491	0.463294	0.255344	0.657577	0.0713954	0.832854
518.589	0.375786	0.176819	0.591682	0.00828002	0.790493
520.785	0.313374	0.146681	0.475697	0.00217648	0.638485
521.334	0.489447	0.291967	0.670905	0.125891	0.830686
521.883	0.547888	0.399477	0.711977	0.25609	0.838884
524.079	NaN	0.00501664	0.892008	-0.183644	1.01517
526	0.409793	0.214379	0.601589	0.0445276	0.782475
526.824	0.357851	0.199073	0.513732	0.0398449	0.647561
527.922	0.418602	0.228814	0.72323	0.0651105	0.962768
529.02	0.657775	0.329543	0.862472	0.119603	1.04857
529.569	0.396631	0.161038	0.753723	-0.0228555	0.987087
530.118	0.508468	0.261056	0.730408	0.0345526	0.909337
531.216	0.486208	0.308853	0.685492	0.145177	0.855151
532.314	0.328895	0.148179	0.507867	-0.0138747	0.691722
533.412	0.523266	0.28294	0.711462	0.0792016	0.862442
534.51	0.560361	0.396469	0.72	0.239687	0.858666
535.059	0.552181	0.396332	0.720568	0.237318	0.883942
535.608	0.502038	0.33709	0.67449	0.185598	0.855721
536.706	0.720291	0.457793	0.919404	0.252804	1.0819
537.804	0.307498	0.0701415	0.825166	-0.103315	1.03961
538.902	0.890454	0.259246	1.23074	-0.000786118	1.41843
540	0.832097	0.620515	1.1696	0.444562	1.40067
540.54	0.508716	0.299277	0.756274	0.119117	0.973901
541.08	0.494779	0.310623	0.651994	0.119117	0.796149
542.16	0.648291	0.464339	0.820844	0.294313	0.978147
543.24	0.561957	0.368768	0.760716	0.202623	0.941882
544.319	0.507622	0.106527	0.711579	-0.14974	0.886646
545.399	0.166835	-0.0542863	0.622723	-0.232998	0.848637
545.939	0.490693	0.0544049	0.700809	-0.165751	0.87246
546.479	0.530446	0.365178	0.683544	0.21372	0.840883
547.559	0.457412	0.305389	0.627508	0.15203	0.772313
548.639	0.673126	0.42107	0.871013	0.211169	1.05829
549.718	0.581266	0.369401	0.797508	0.184104	0.993719
550.798	0.448818	0.260275	0.638921	0.103374	0.838399
551.338	0.55884	0.352253	0.743022	0.14842	0.91478
551.878	0.577508	0.418251	0.764349	0.253598	0.912418
552.958	0.736568	0.509081	0.932869	0.304498	1.13039
554.037	0.60982	0.413826	0.82715	0.242803	1.05484
555.117	0.50971	0.339532	0.66834	0.188595	0.82422
556.197	0.491659	0.323514	0.658324	0.169932	0.797779
556.737	0.383128	0.216881	0.557345	0.0394772	0.73917
557.277	0.318358	0.157381	0.488348	-0.0127405	0.640384
558.356	0.326068	0.172	0.496905	-0.01318	0.65174
558.896	0.324104	0.165549	0.480524	0.00893974	0.641485
559.436	0.271072	0.102964	0.430836	-0.0655937	0.587529
560.516	0.293582	0.132918	0.452668	-0.0367348	0.622677
561.595	0.390861	0.222713	0.560977	0.0509677	0.727457
562.675	0.384342	0.215145	0.557539	0.0521195	0.729257
563.215	0.10227	-0.0934647	0.316388	-0.275131	0.541966
567.535	0.0787257	-0.0977436	0.252728	-0.289811	0.432914
568.614	0.131865	-0.0261548	0.283854	-0.194133	0.448119
569.694	0.156573	0.00801238	0.32044	-0.159645	0.475466
570.774	0.01709	-0.177763	0.221943	-0.325551	0.408495
571.854	-0.231729	-0.418904	-0.0127926	-0.579454	0.166179
572.933	-0.314081	-0.468394	-0.147986	-0.619576	0.0114357
573.203	NaN	-0.428228	0.313154	-0.651296	0.452447
574.013	-0.0606499	-0.219505	0.102691	-0.390007	0.264034
575.093	-0.06155	-0.226865	0.0955981	-0.40227	0.251516
575.633	NaN	-0.365448	0.339454	-0.491779	0.45651
576.173	-0.127405	-0.299777	0.0547657	-0.449553	0.213667
577.252	-0.166914	-0.330339	-0.0121191	-0.487864	0.131859
578.332	0.0392054	-0.182984	0.238232	-0.400569	0.409509
579.412	0.347447	0.0994002	0.543518	-0.109648	0.719338
580.492	0.295559	0.0537908	0.513283	-0.153235	0.692136
581.302	0.307434	0.0709016	0.508826	-0.147265	0.686142
581.572	0.510594	0.329891	0.685598	0.186786	0.857109
582.651	0.518613	0.281493	0.730135	0.102031	0.927006
583.731	0.562406	0.309125	0.771946	0.113961	0.949299
584.001	0.772757	0.585217	0.958142	0.406413	1.12706
584.718	0.647169	0.455424	0.870141	0.293839	1.05873
585.673	0.393958	0.214971	0.581003	0.0499621	0.750349
586.389	0.348449	0.185816	0.514706	0.0266926	0.671434
586.628	0.379884	0.220075	0.540942	0.0737131	0.703661
587.584	0.405572	0.182181	0.613742	0.0112297	0.797965
588.539	0.342887	0.132793	0.579225	-0.0131011	0.789941
588.778	0.273791	0.120265	0.446356	-0.032661	0.592214
589.494	0.331726	0.172661	0.498848	0.0193525	0.66883
590.449	0.300296	0.0514015	0.5247	-0.168346	0.689781
591.166	0.194198	-0.0131969	0.459588	-0.215894	0.675634
591.404	0.382845	0.0791857	0.58582	-0.155981	0.760842
592.36	0.419888	0.226371	0.598242	0.0429895	0.758719
593.315	0.368385	0.174064	0.561995	-0.0141754	0.740439
593.554	0.36521	0.196183	0.540368	0.0275009	0.705596
594.27	0.43645	0.27133	0.601591	0.102639	0.755478
595.225	0.218293	0.0131361	0.445817	-0.187884	0.655518
595.942	0.197738	0.0118393	0.367143	-0.176424	0.527848
596.181	0.521284	0.237215	0.743764	0.0288745	0.901726
597.136	0.350509	0.155806	0.578206	-0.0143856	0.813125
598.091	0.310869	0.140484	0.488496	-0.00666403	0.64471
598.33	0.433655	0.263202	0.597656	0.0740641	0.759122
599.046	0.801978	0.456514	1.01993	0.224801	1.19745
600.001	0.640597	0.435663	0.876268	0.246531	1.10119
601.217	0.5662	0.383288	0.744115	0.227123	0.943924
601.622	0.514777	0.343731	0.674722	0.196199	0.829461
603.244	0.403037	-0.183983	0.661351	-0.385167	0.857135
604.865	-0.0334282	-0.249608	0.575745	-0.424292	0.824516
605.271	0.102838	-0.159916	0.31275	-0.376952	0.482625
606.487	0.142071	-0.0715756	0.386408	-0.256852	0.597826
608.109	0.282172	0.00517158	0.48349	-0.219372	0.671667
608.92	0.157322	-0.058979	0.404212	-0.238703	0.610342
610.542	0.0770075	-0.101635	0.263201	-0.26669	0.425283
612.164	0.0492765	-0.122223	0.231466	-0.284073	0.406845
612.569	0.256574	-0.0202382	0.447323	-0.225693	0.613208
613.785	0.110748	-0.0966856	0.367524	-0.276899	0.576001
615.407	0.0301025	-0.133218	0.195327	-0.317947	0.354356
616.623	NaN	NaN	NaN	NaN	NaN
617.028	NaN	0.134087	0.873418	-0.0786278	1.0776
618.65	0.649776	0.440081	0.83097	0.275648	0.999738
620.271	NaN	0.340657	1.12628	0.140504	1.29477
620.676	0.759377	0.600022	0.926751	0.435412	1.09483
621.893	0.0500119	-0.171344	0.784481	-0.341001	1.02643
623.514	0.719759	-0.0637206	0.951437	-0.274438	1.13808
624.73	NaN	0.428062	1.20775	0.285783	1.49569
625.135	0.818435	0.656624	0.980294	0.501542	1.14484
626.757	0.72024	0.398584	0.976349	0.197416	1.15498
628.379	0.555901	0.326674	0.912231	0.143634	1.13426
628.784	0.700109	0.430568	0.903526	0.205143	1.07237
630	0.777481	0.617948	0.937302	0.465411	1.09075
631.15	0.760293	0.585908	0.916487	0.423306	1.0834
632.013	NaN	0.342207	1.14512	0.191506	1.30127
632.301	0.797777	0.634656	0.959819	0.458526	1.13119
633.451	0.848047	0.628938	1.07113	0.438618	1.26755
634.601	0.934363	0.68853	1.1349	0.441601	1.30227
634.889	1.35078	1	1.55629	0.794996	1.70832
635.751	1.16621	0.971418	1.46477	0.785659	1.65574
636.902	0.984654	0.818604	1.15377	0.656828	1.32595
637.765	NaN	0.541764	1.33231	0.386606	1.48489
638.052	1.17142	0.928803	1.36584	0.716253	1.54593
638.628	1.25221	1.11121	1.40832	0.966881	1.54857
639.778	NaN	0.295879	1.76026	0.182677	1.94358
640.641	1.30334	0.61537	1.52305	0.400483	1.70602
640.928	1.11134	0.904345	1.41476	0.737261	1.6402
642.078	0.90869	0.668862	1.11937	0.477566	1.30235
643.229	0.800122	0.601978	1.04632	0.430318	1.25809
643.516	0.613489	0.441866	0.787682	0.276801	0.987826
644.379	0.545759	0.388997	0.73695	0.221238	0.8935
645.529	NaN	0.413151	1.53782	0.287513	1.69772
646.392	1.09134	0.720884	1.30504	0.494048	1.48648
646.679	1.25463	1.08521	1.41698	0.925634	1.58481
647.83	0.724073	0.298447	1.16109	0.105838	1.46776
648.979	0.448528	0.237185	0.825976	0.0611251	1.02697
649.267	0.87918	0.338741	1.10082	0.124264	1.27943
650.13	0.813498	0.610334	1.01849	0.429833	1.21551
651.28	0.81454	0.627877	0.984839	0.43886	1.15933
651.855	0.974489	0.796229	1.1612	0.605145	1.33598
652.43	0.814869	0.618401	1.0651	0.443076	1.2848
653.581	0.5762	0.38578	0.77343	0.223432	0.969027
654.732	0.515386	0.340071	0.657304	0.201214	0.827117
655.019	NaN	0.614663	1.37069	0.437935	1.49806
655.882	0.934726	0.766059	1.09617	0.627147	1.25923
657.032	0.860452	0.525605	1.12043	0.322162	1.30839
657.895	0.673424	0.450323	1.06692	0.273333	1.27644
658.182	0.411681	0.219055	0.612753	0.0350127	0.800162
659.333	0.476011	0.281354	0.66513	0.0993699	0.844043
660.483	0.541107	0.382335	0.711071	0.243719	0.870659
660.771	NaN	0.289298	1.05013	0.161918	1.10692
661.634	0.59395	0.414708	0.774957	0.246874	0.940772
662.784	0.735482	0.499153	1.01591	0.322389	1.20996
663.646	0.729658	0.514668	0.997325	0.350041	1.22119
663.934	0.462077	0.275171	0.682547	0.114634	0.868908
665.085	0.386987	0.235389	0.566378	0.0641142	0.722588
666.235	NaN	NaN	NaN	NaN	NaN
666.522	NaN	NaN	NaN	NaN	NaN
667.385	NaN	NaN	NaN	NaN	NaN
668.535	NaN	NaN	NaN	NaN	NaN
669.398	NaN	NaN	NaN	NaN	NaN
669.685	NaN	NaN	NaN	NaN	NaN
670.836	NaN	NaN	NaN	NaN	NaN
671.986	NaN	NaN	NaN	NaN	NaN
672.274	NaN	0.45524	1.23754	0.188224	1.38111
673.137	0.83586	0.667152	0.989942	0.511243	1.18409
674.287	NaN	0.222449	0.974674	0.065091	1.12831
675.15	NaN	0.222449	0.974674	0.065091	1.12831
675.437	0.573392	0.419563	0.736829	0.271329	0.909268
676.588	NaN	NaN	NaN	NaN	NaN
677.738	NaN	NaN	NaN	NaN	NaN
678.026	NaN	NaN	NaN	NaN	NaN
678.888	NaN	0.0611907	0.805503	-0.0739591	1.15852
680.038	0.433858	0.274101	0.622588	0.119664	0.777569
680.614	NaN	-0.230326	0.503215	-0.331944	0.62711
681.764	0.151224	-0.00881863	0.31486	-0.152642	0.480915
682.915	0.155953	-0.0121904	0.323988	-0.175337	0.497978
683.777	NaN	NaN	NaN	NaN	NaN
684.065	NaN	-0.278219	0.467847	-0.39703	0.592344
685.215	-0.122535	-0.346664	0.103562	-0.557849	0.295188
686.365	-0.218989	-0.405437	-0.0178994	-0.597562	0.178114
686.653	-0.102082	-0.311157	0.10643	-0.544279	0.257778
687.516	-0.0944954	-0.260052	0.0669788	-0.422638	0.236533
688.666	-0.0953294	-0.270537	0.0921235	-0.444708	0.266481
689.529	-0.0462917	-0.239193	0.13594	-0.440761	0.306249
689.817	0.103018	-0.0813215	0.273918	-0.248493	0.459676
690.967	-0.0327681	-0.461962	0.22409	-0.667232	0.422569
692.117	-0.302795	-0.529339	0.113356	-0.710818	0.336582
692.404	-0.236922	-0.456774	-0.0431759	-0.661445	0.116606
693.267	-0.0672962	-0.238461	0.10547	-0.412889	0.264052
694.418	-0.177508	-0.462552	0.0594369	-0.659867	0.243649
695.281	-0.159054	-0.441304	0.0517116	-0.652847	0.22543
695.568	-0.26552	-0.471459	-0.0258675	-0.640695	0.177619
696.718	-0.26774	-0.454194	-0.0760716	-0.620826	0.101877
697.869	-0.279599	-0.46103	-0.0907428	-0.620946	0.0862125
698.156	-0.112526	-0.368999	0.0852513	-0.584664	0.260472
699.019	-0.177614	-0.375203	0.0312985	-0.544831	0.224437
700.17	-0.23866	-0.651033	0.253923	-0.838207	0.452515
701.032	0.111127	-0.609493	0.326021	-0.82744	0.500152
701.32	-0.00875601	-0.21709	0.234945	-0.39847	0.441284
702.47	0.0501793	-0.157341	0.272475	-0.337141	0.464839
703.62	0.0190718	-0.168846	0.234553	-0.331137	0.440959
704.195	0.151461	-0.0818803	0.34956	-0.273288	0.527402
704.771	0.0974138	-0.0758605	0.287478	-0.241208	0.47626
705.921	0.276612	-0.00422347	0.785408	-0.180067	0.995376
706.784	0.254089	0.017022	0.757104	-0.156317	0.970212
707.071	0.353934	0.109301	0.552018	-0.096133	0.710503
708.222	0.340567	-0.116443	0.600833	-0.329635	0.785039
709.372	0.0286554	-0.194656	0.538865	-0.372648	0.793529
709.66	0.5772	-0.0938259	0.783735	-0.30826	0.982476
710.523	1.01096	0.668741	1.22659	0.456701	1.37644
711.673	0.477472	0.279983	0.990851	0.110896	1.28811
712.536	0.408888	0.231416	0.57113	0.0822381	0.726016
712.823	0.495292	0.307672	0.675203	0.146184	0.839751
713.974	0.572227	0.367773	0.775791	0.189312	0.972088
715.124	0.529352	0.329718	0.740541	0.162009	0.95791
715.412	0.708261	0.425484	0.919755	0.213851	1.08716
716.274	0.622565	0.441859	0.82097	0.275487	1.03258
717.425	0.547947	0.390937	0.714851	0.225146	0.869476
718	0.973845	0.52722	1.18958	0.304612	1.36884
718.615	1.09953	0.941766	1.26438	0.780953	1.41565
719.231	0.791175	0.58189	1.13789	0.405832	1.34771
719.846	0.726495	0.561402	0.891103	0.402714	1.04622
720.462	0.700482	0.529986	0.858699	0.372839	1.00695
721.385	0.692778	0.527523	0.855576	0.368425	1.00599
721.692	0.732586	0.557903	0.898464	0.389344	1.07829
722.923	0.572501	0.314469	0.811541	0.116895	0.982196
724.154	0.449066	0.253012	0.703005	0.0819131	0.921247
724.462	0.904852	0.339342	1.13496	0.116505	1.32465
725.385	0.670378	0.459911	1.02599	0.27795	1.26185
726.616	0.155903	-0.0910139	0.480242	-0.294123	0.761407
727.539	0.0452037	-0.154795	0.262939	-0.335968	0.455197
727.846	0.285358	-0.0459276	0.516015	-0.286824	0.687317
729.077	0.591021	0.369691	0.840766	0.169814	1.03393
730.308	0.710265	0.4885	0.904622	0.288931	1.07821
730.616	1.03991	0.769049	1.25054	0.545796	1.41338
731.539	0.776301	0.537265	1.14506	0.364584	1.36152
732.77	0.333455	0.135925	0.590066	-0.0449985	0.859136
733.693	0.261061	0.0957907	0.430691	-0.0734896	0.618061
734.001	0.413006	0.177164	0.60548	-0.0130662	0.782309
735.232	0.362988	0.171879	0.558442	-0.0139221	0.725373
736.463	0.355312	0.180899	0.541577	-0.0128188	0.703612
736.77	0.241326	0.0430488	0.451488	-0.124635	0.6475
737.694	0.202909	0.0218938	0.353068	-0.124884	0.506348
738.924	0.296348	0.0676405	0.537286	-0.112017	0.727062
739.848	0.398268	0.127444	0.602686	-0.0860361	0.765494
740.155	0.357132	0.169707	0.555115	0.0205497	0.746524
741.386	0.385598	0.207568	0.557957	0.0635688	0.739266
742.617	0.415762	0.265401	0.590885	0.092068	0.733146
742.924	NaN	0.0880704	0.854732	-0.0938193	0.966606
743.847	0.536879	0.365347	0.7052	0.196453	0.872065
745.078	0.490956	0.303076	0.675894	0.118586	0.852192
746.001	0.43459	0.251462	0.619498	0.0790587	0.810197
746.251	0.832268	0.373651	1.04589	0.155079	1.22468
747.251	0.735221	0.1466	0.991424	-0.0543639	1.16198
748.251	0.302095	0.079109	0.873154	-0.0816202	1.10527
748.501	0.922381	0.177946	1.14755	-0.03352	1.32821
749.251	0.898788	0.717152	1.08098	0.53725	1.24818
750.251	0.491173	0.139631	0.792068	-0.0732139	1.03971
751.001	0.490154	0.174529	0.705959	-0.03231	0.896202
751.251	0.560069	0.394893	0.718568	0.219776	0.887814
752.251	0.627137	0.404712	0.832797	0.192971	1.02471
756.752	0.660148	0.494904	0.816542	0.354838	0.975412
757.752	0.638182	0.362748	0.874284	0.151529	1.06794
758.502	0.517567	0.296695	0.81491	0.113364	1.04607
758.752	0.474484	0.303605	0.640158	0.150012	0.798515
759.752	0.403621	0.195262	0.591207	0.0163739	0.761224
760.752	0.409853	0.207067	0.591216	0.028113	0.747209
761.001	0.484325	0.328738	0.650176	0.172451	0.80293
761.752	0.0931686	-0.128231	0.486032	-0.294398	0.733645
762.751	-0.0666337	-0.231164	0.0960198	-0.379256	0.264068
763.501	NaN	-0.452343	0.292874	-0.56386	0.436069
763.751	0.116275	-0.116129	0.319532	-0.318497	0.511554
764.752	0.185612	-0.0934616	0.450395	-0.292342	0.652312
765.752	0.061337	-0.151598	0.403385	-0.335589	0.614645
766.002	0.194685	-0.0686658	0.415316	-0.275475	0.583273
766.752	0.147016	-0.0404707	0.342837	-0.205616	0.541047
767.752	0.0820637	-0.174602	0.35414	-0.367372	0.546071
768.502	-0.0126986	-0.236064	0.32695	-0.39134	0.539454
768.752	0.121813	-0.126603	0.327983	-0.331786	0.525599
769.752	0.0592913	-0.156745	0.255753	-0.340221	0.456912
770.752	-0.0241739	-0.218571	0.169515	-0.367259	0.361124
771.002	0.000313804	-0.170962	0.176567	-0.332074	0.335035
771.752	-0.107751	-0.295643	0.0928106	-0.453571	0.290561
772.752	-0.162713	-0.331348	-0.010314	-0.4699	0.148616
773.502	-0.161807	-0.326519	-0.00829554	-0.4699	0.152952
773.752	0.0889087	-0.177545	0.273438	-0.423803	0.471051
774.752	-0.257739	-0.473999	0.0749196	-0.665425	0.369996
775.752	-0.351535	-0.52963	-0.162713	-0.693819	0.0150023
776.002	0.0401497	-0.413073	0.262636	-0.632596	0.437611
776.752	0.014026	-0.171694	0.201265	-0.329032	0.385245
777.752	0.0754914	-0.105014	0.25573	-0.260945	0.42753
778.502	NaN	-0.240696	0.511559	-0.355489	0.645759
778.752	0.0220208	-0.153576	0.213493	-0.283662	0.377013
779.752	-0.103935	-0.304655	0.086076	-0.488384	0.252738
780.752	-0.170772	-0.358029	0.0252274	-0.521616	0.221577
781.002	0.240223	-0.242719	0.462574	-0.467685	0.654069
781.752	0.331391	0.177083	0.490901	0.0186412	0.64339
782.752	0.100072	-0.104046	0.344178	-0.285769	0.555398
783.502	NaN	-0.397222	0.39178	-0.521668	0.493854
783.752	0.007362	-0.155426	0.166903	-0.307685	0.327085
784.752	0.0652143	-0.182213	0.356391	-0.377021	0.547826
785.752	-0.0131722	-0.229498	0.325475	-0.422715	0.531723
786.002	0.138463	-0.114303	0.357141	-0.330405	0.514192
786.752	0.261693	0.0952385	0.410074	-0.0696872	0.582141
787.752	0.252885	0.103129	0.409221	-0.0568628	0.586341
788.502	NaN	NaN	NaN	NaN	NaN
788.752	NaN	0.393014	1.16799	0.319558	1.37094
789.752	1.06843	0.779875	1.27643	0.548288	1.44149
790.752	1.16178	1.01399	1.32669	0.857703	1.4782
791.002	NaN	0.361299	1.09242	0.207897	1.19088
791.752	0.796652	0.630065	0.977837	0.471086	1.1333
792.752	0.848627	0.688055	1.013	0.544297	1.16318
793.502	NaN	0.479129	1.22305	0.334124	1.38364
793.752	0.823518	0.659938	0.989858	0.507601	1.16136
794.252	1.36987	0.791368	1.60082	0.588738	1.76289
795.252	1.27564	1.08717	1.47916	0.909872	1.67436
796.002	1.25247	1.08018	1.4148	0.907357	1.56513
796.227	0.905803	0.693169	1.28088	0.503394	1.51037
797.127	0.899853	0.644961	1.37807	0.457666	1.57175
798.028	1.23215	0.718071	1.44705	0.471258	1.60154
798.253	1.00498	0.788343	1.34192	0.625781	1.54702
798.927	0.703672	0.507566	0.93167	0.31072	1.1307
799.827	0.576438	0.412594	0.740961	0.255955	0.898117
800.503	0.526279	0.366107	0.682285	0.206828	0.834705
801.628	0.499421	0.341002	0.659112	0.19042	0.821333
802.527	0.502132	0.347119	0.664798	0.195909	0.81085
802.752	0.456494	0.275282	0.621677	0.126131	0.796763
803.427	0.45967	0.295505	0.622344	0.138284	0.782032
804.328	0.414747	0.257283	0.574129	0.094925	0.7435
805.003	0.397613	0.245684	0.562889	0.0686199	0.732269
805.228	0.401976	0.244366	0.564228	0.0873993	0.719574
806.128	0.340643	0.160298	0.516469	0.00859802	0.680325
807.028	0.300513	0.122705	0.471394	-0.0186913	0.650005
807.253	0.268572	0.121028	0.433147	-0.0400947	0.580438
807.928	0.523959	0.255699	0.730087	0.0521816	0.887089
808.828	0.37853	0.182524	0.607064	-0.00962341	0.805664
809.503	0.351849	0.174698	0.535806	-0.00224255	0.722022
809.728	0.435868	0.268339	0.596822	0.110385	0.750788
810.628	0.403068	0.187274	0.598689	-0.00655508	0.775754
811.528	0.333217	0.140088	0.543239	-0.0578168	0.740599
811.753	0.189509	0.0250102	0.349496	-0.148564	0.505771
812.428	0.340041	0.116635	0.533487	-0.0571476	0.699119
813.328	0.409919	0.207122	0.601809	0.0123944	0.775939
814.003	0.362571	0.167617	0.565513	-0.00609318	0.771507
814.228	0.121056	-0.0604761	0.337151	-0.231139	0.546048
815.128	0.00980977	-0.308746	0.271433	-0.515378	0.457509
816.028	-0.151338	-0.375055	0.20532	-0.556093	0.431381
816.253	-0.11747	-0.313963	0.057323	-0.506544	0.222382
816.928	0.320867	-0.0603611	0.54231	-0.291646	0.717479
817.828	0.254539	0.0584081	0.464477	-0.129089	0.653205
818.503	0.182441	0.00348967	0.373505	-0.175857	0.547768
818.728	0.343208	0.110379	0.551161	-0.117758	0.726301
819.627	0.416428	0.256271	0.568474	0.10314	0.748629
820.528	0.420752	0.240634	0.557551	0.0905715	0.72825
820.753	NaN	-0.13479	0.600602	-0.235539	0.745651
821.428	-0.0734306	-0.282488	0.217371	-0.439385	0.427327
822.328	0.14903	-0.126351	0.385522	-0.377209	0.566272
823.003	0.16801	-0.00434409	0.373133	-0.192884	0.561762
823.228	0.0282905	-0.137278	0.189939	-0.306601	0.357245
824.127	0.030231	-0.13595	0.199204	-0.289899	0.368376
825.027	0.0274474	-0.138223	0.199007	-0.288837	0.361633
825.252	0.207583	-0.0192358	0.408731	-0.235308	0.592719
825.927	0.238626	0.0767835	0.400739	-0.0924606	0.572761
826.827	-0.0882423	-0.274459	0.153414	-0.443256	0.392136
827.502	-0.1199	-0.286513	0.035465	-0.446551	0.193556
827.727	-0.188499	-0.369985	-0.012142	-0.530455	0.1474
828.178	-0.0500457	-0.259624	0.141484	-0.477593	0.296946
829.078	-0.0404747	-0.293803	0.178774	-0.497428	0.354735
829.753	0.00732389	-0.261255	0.216987	-0.485004	0.39342
829.978	-0.104442	-0.302042	0.133573	-0.486036	0.344791
830.877	0.031452	-0.180828	0.250682	-0.400779	0.416721
831.777	0.0577859	-0.120001	0.249966	-0.306595	0.42288
832.002	-0.0670965	-0.225124	0.102924	-0.410853	0.261223
833.101	0.161593	-0.112212	0.359216	-0.3341	0.538667
834.567	-0.0552572	-0.344425	0.226486	-0.537465	0.426798
835.667	-0.059788	-0.321685	0.148831	-0.523442	0.315937
836.033	-0.0343884	-0.193102	0.132065	-0.362231	0.28093
837.499	-0.160304	-0.32322	0.0122685	-0.508258	0.177381
838.964	-0.214845	-0.363168	-0.0600619	-0.558674	0.123352
839.331	NaN	-0.507899	0.291245	-0.688222	0.50501
840.43	-0.0304915	-0.200754	0.138843	-0.360868	0.320697
841.896	-0.156338	-0.346948	0.0490051	-0.541112	0.239951
843.362	0.0398881	-0.242814	0.237191	-0.472621	0.414952
844.827	0.0738169	-0.10318	0.245816	-0.270679	0.395924
846.293	0.0485349	-0.116201	0.215815	-0.289315	0.346996
846.659	NaN	-0.666732	0.0610576	-0.869663	0.247702
847.758	-0.151011	-0.361703	0.0262945	-0.549762	0.195533
849.224	-0.148963	-0.328346	0.0109218	-0.468925	0.170671
850.69	-0.193529	-0.357434	-0.0353526	-0.503082	0.110551
852.155	-0.152947	-0.323256	0.0076516	-0.465636	0.177532
853.621	-0.12908	-0.294848	0.035887	-0.441589	0.185702
853.988	NaN	-0.13432	0.609156	-0.227021	0.764005
855.087	0.136751	-0.0480132	0.322093	-0.200057	0.502208
856.552	0.0926697	-0.0820002	0.248373	-0.253204	0.426165
856.919	NaN	-0.107258	0.646269	-0.166702	0.721356
858.018	0.255077	0.105549	0.418267	-0.0483212	0.592546
858.751	NaN	-0.324148	0.412471	-0.437626	0.58502
859.483	0.169804	-0.0251374	0.33978	-0.199079	0.489956
860.583	NaN	-0.177494	0.629618	-0.35661	0.76471
860.949	0.234975	0.0685476	0.384479	-0.106253	0.521401
861.316	NaN	-0.217637	0.513682	-0.366585	0.610997
862.415	0.234532	0.0651785	0.40216	-0.0915867	0.55225
863.88	0.278771	0.119821	0.438599	-0.0378894	0.567124
864.247	NaN	-0.100192	0.624394	-0.238994	0.722255
865.346	0.269195	0.10171	0.429503	-0.0422929	0.592559
866.079	NaN	-0.026246	0.745842	-0.243666	1.09314
866.811	0.176019	-0.0221433	0.388714	-0.182877	0.573294
867.911	NaN	-0.295691	0.462147	-0.350391	0.551639
868.277	0.583778	0.0877356	0.80797	-0.141564	1.00129
869.743	0.613705	0.445113	0.788017	0.275351	0.964294
870.842	0.577024	0.422378	0.737176	0.26265	0.891217
871.575	NaN	0.688858	1.40923	0.531253	1.59837
872.674	1.04738	0.881365	1.21656	0.733234	1.37756
873.407	NaN	0.615397	1.43605	0.490548	1.52096
874.14	0.983314	0.829609	1.15133	0.6568	1.28949
875.239	NaN	0.59557	1.31692	0.430524	1.47898
875.605	0.841197	0.661261	1.01496	0.478	1.22229
877.071	0.907715	0.728481	1.09457	0.542429	1.26017
878.536	0.973091	0.806773	1.12603	0.627035	1.26833
878.903	NaN	0.582121	1.34484	0.353908	1.54789
880.002	0.976881	0.819862	1.14191	0.659138	1.31134
880.49	1.05561	0.893615	1.2182	0.743713	1.36499
881.465	1.05784	0.91546	1.21664	0.757878	1.37327
881.709	NaN	0.83484	1.55028	0.727085	1.69456
882.441	1.19676	1.03736	1.3561	0.903898	1.50567
882.929	NaN	0.672853	1.43705	0.583629	1.57868
883.417	0.972564	0.799927	1.15234	0.631755	1.31484
884.148	NaN	0.559914	1.31545	0.453641	1.46814
884.392	0.814768	0.637119	0.992405	0.479692	1.16691
885.368	1.05223	0.747844	1.27734	0.537226	1.42739
886.343	1.14811	0.989377	1.32016	0.821085	1.47766
886.587	NaN	0.50603	1.28925	0.305667	1.43957
887.319	0.896283	0.729591	1.0547	0.585021	1.2307
887.807	NaN	0.720153	1.46203	0.647678	1.59561
888.295	1.11025	0.945358	1.27107	0.787777	1.42316
889.026	NaN	0.753086	1.492	0.657037	1.59376
889.27	1.01556	0.834795	1.19209	0.673009	1.37095
890.246	1.02725	0.861251	1.18654	0.710789	1.34213
891.221	1.05679	0.911299	1.21723	0.766279	1.35322
891.465	NaN	0.479207	1.21191	0.361658	1.34251
892.197	0.827404	0.65457	0.992443	0.500681	1.12106
892.685	NaN	0.221125	0.993052	0.120582	1.07791
893.173	0.664378	0.494467	0.842987	0.322254	0.985518
893.904	NaN	0.317703	1.06136	0.196733	1.20779
894.148	0.696524	0.531978	0.857048	0.367815	1.01588
895.124	0.811949	0.639817	0.993621	0.440742	1.15539
896.099	0.876588	0.707008	1.03544	0.542911	1.17317
896.343	NaN	0.145206	0.881474	-0.0200269	1.16247
897.075	0.505413	0.342728	0.689841	0.216918	0.837887
897.563	NaN	0.516995	1.26264	0.337995	1.39354
898.782	NaN	0.516867	1.26278	0.337995	1.39354
899.026	0.609342	0.395704	0.907283	0.225	1.1143
900.002	0.700093	0.482083	0.897616	0.295766	1.06304
900.978	0.785288	0.610383	0.956001	0.449228	1.11753
901.221	NaN	0.381389	1.13994	0.240712	1.22693
901.953	0.736806	0.583197	0.90856	0.420773	1.05993
902.441	NaN	0.389901	1.14274	0.250634	1.29761
902.928	0.563666	0.363375	0.788316	0.187701	0.985438
903.66	NaN	0.0830624	0.834834	-0.0458793	1.02875
903.904	0.726394	0.467834	0.932951	0.24554	1.12328
904.88	0.476713	0.260723	0.833706	0.0703162	1.07161
905.855	0.379446	0.226497	0.544688	0.0361606	0.676543
906.099	NaN	0.328352	1.0454	0.250868	1.20615
906.831	0.670346	0.496913	0.817666	0.383309	0.952653
907.319	NaN	0.237956	1.02198	0.0353704	1.14959
907.806	0.6033	0.445482	0.770746	0.294729	0.909825
908.538	NaN	0.228188	0.937364	0.0756094	1.10072
908.782	0.579502	0.412937	0.74498	0.251032	0.909463
909.758	0.420555	0.229761	0.633842	0.0594754	0.855217
910.733	0.347417	0.187267	0.500041	0.0423214	0.68049
910.977	NaN	0.331321	1.08524	0.229772	1.20859
911.709	0.708272	0.556923	0.874095	0.396965	1.03745
912.196	NaN	-0.04919	0.703018	-0.20916	0.833556
912.684	0.473862	0.252119	0.673878	0.0745984	0.833604
913.416	NaN	0.154127	0.930362	0.0748389	1.08956
913.66	0.584299	0.417988	0.751027	0.247422	0.898798
914.635	0.802453	0.577839	0.997114	0.371944	1.18699
915.611	0.881306	0.718017	1.04645	0.611151	1.21259
915.855	NaN	0.607405	1.37731	0.436075	1.46153
916.586	0.811934	0.607136	1.03492	0.420976	1.2346
917.074	0.729591	0.561661	0.900017	0.397438	1.05846
918.293	NaN	0.208888	0.903856	0.0729314	1.00948
919.025	0.539515	0.391052	0.711884	0.250938	0.83991
919.513	NaN	0.308238	1.10466	0.132534	1.21067
920.001	0.851334	0.647952	1.03355	0.443749	1.19247
920.826	NaN	0.508629	1.24329	0.259208	1.38242
921.1	0.798463	0.620619	0.970027	0.447268	1.15903
922.2	0.364909	0.154439	0.749807	-0.0228397	0.995097
923.3	0.265902	0.111284	0.441675	-0.0361811	0.590158
923.575	NaN	0.240828	1.03137	0.147289	1.2165
924.4	0.639242	0.477648	0.814566	0.319158	0.967971
924.95	NaN	0.163479	0.921813	0.0813474	1.06591
925.5	0.359554	0.164049	0.589646	-0.0256966	0.798518
926.325	NaN	-0.115033	0.627264	-0.313173	0.734852
926.6	0.362295	0.191647	0.524266	0.029538	0.682396
927.7	0.121797	-0.12998	0.40304	-0.295896	0.615795
930.45	0.157481	-0.0845847	0.334279	-0.277159	0.497781
931.825	0.0616085	-0.124992	0.260153	-0.297648	0.449651
933.2	-0.0371233	-0.19578	0.12031	-0.345176	0.28715
934.576	0.00828215	-0.166237	0.172767	-0.320616	0.325018
935.951	-0.0455462	-0.225772	0.134973	-0.374992	0.30044
937.326	-0.0839211	-0.264366	0.0740661	-0.396254	0.230302
938.701	NaN	NaN	NaN	NaN	NaN
940.351	NaN	NaN	NaN	NaN	NaN
941.451	NaN	-0.579926	0.18338	-0.726873	0.297576
942.001	NaN	-0.556722	0.18442	-0.726873	0.346167
942.276	-0.0810431	-0.261977	0.0872319	-0.415797	0.262943
944.751	-0.211393	-0.40039	0.00651646	-0.573147	0.200938
947.501	-0.300433	-0.450543	-0.134972	-0.620556	0.0251313
950.251	-0.224965	-0.398295	-0.0502435	-0.57347	0.125889
952.176	-0.200661	-0.369439	-0.0285848	-0.546885	0.121108
952.726	NaN	-0.646216	0.0869719	-0.718894	0.223456
953	-0.279259	-0.442258	-0.11064	-0.59739	0.0387029
954.1	-0.068544	-0.299035	0.125344	-0.506233	0.286419
955.2	NaN	-0.313189	0.387061	-0.43788	0.520402
955.475	-0.00972634	-0.155495	0.152559	-0.300543	0.30299
957.675	-0.0167888	-0.166949	0.134655	-0.29369	0.303813
958.225	NaN	-0.381912	0.354698	-0.495356	0.464583
958.775	0.448768	-0.0415344	0.662683	-0.259548	0.840297
959.875	0.0641589	-0.168409	0.56415	-0.356035	0.758721
960.975	-0.0542069	-0.238097	0.118528	-0.402903	0.269709
961.25	NaN	0.0234885	0.742743	-0.0634602	0.878267
962.075	0.323178	0.159031	0.486812	0.00216936	0.650146
963.175	0.683987	0.301722	0.916957	0.0810951	1.10778
964	NaN	0.406943	1.17338	0.335615	1.29412
964.275	0.478842	0.273727	0.832999	0.0733811	1.067
965.375	0.388484	0.224684	0.538308	0.061289	0.692845
966.475	0.385603	0.228616	0.539709	0.0529127	0.705997
966.75	NaN	0.234538	0.955102	0.0897765	1.09978
967.575	0.464429	0.289784	0.654751	0.112074	0.837937
968.675	0.410526	0.241731	0.564459	0.0838523	0.699927
969.225	NaN	-0.0148846	0.715085	-0.269702	0.859105
969.774	0.235799	0.0554235	0.41381	-0.121181	0.609077
970.874	0.182149	0.00642349	0.348419	-0.160689	0.518004
971.974	0.208779	0.0395672	0.371578	-0.144898	0.531094
972.249	0.150272	-0.0251325	0.322388	-0.180231	0.494144
974.999	0.115403	-0.0521026	0.271061	-0.204739	0.419567
977.749	-0.050841	-0.25027	0.16312	-0.405621	0.349116
980.498	0.146051	-0.142975	0.354116	-0.364057	0.550466
982.973	-0.0235299	-0.246743	0.252769	-0.414904	0.466163
985.998	0.0976376	-0.148261	0.3139	-0.370329	0.491182
988.233	-0.0890263	-0.305833	0.188222	-0.46246	0.41108
990.468	-0.0607084	-0.255208	0.119482	-0.420742	0.268987
992.48	0.0974782	-0.095548	0.29438	-0.266689	0.474349
994.492	0.172585	-0.0295249	0.345539	-0.213205	0.505911
995.162	0.165677	-0.00728076	0.320253	-0.16262	0.485476
996.057	0.203202	0.0351761	0.362473	-0.129557	0.507205
996.727	NaN	-0.103666	0.566899	-0.3889	0.780746
996.951	0.0787045	-0.10143	0.279986	-0.280596	0.462291
997.845	0.224259	-0.0260157	0.435643	-0.232446	0.59165
998.739	0.308398	0.144454	0.483064	-0.0150055	0.629125
999.186	NaN	-0.0538483	0.70212	-0.14867	0.891651
999.633	0.3021	0.142695	0.465506	-0.00171619	0.614043
1000.53	0.218039	0.0494351	0.383323	-0.102467	0.540931
1001.42	0.177222	0.0249809	0.334734	-0.114798	0.48065
1001.65	NaN	-0.0565801	0.698996	-0.204707	0.799517
1002.32	0.367683	0.209963	0.534965	0.0548967	0.689257
1003.21	0.277732	0.0970613	0.446242	-0.069108	0.637224
1003.88	NaN	-0.169114	0.594006	-0.251311	0.813756
1004.1	0.0260849	-0.172552	0.2645	-0.351088	0.447006
1005	0.373439	-0.0719629	0.598793	-0.286506	0.765978
1005.74	0.624748	0.420964	0.807486	0.254124	0.972724
1006.48	0.676049	0.508735	0.84461	0.352952	1.00311
1006.66	NaN	0.192585	0.940839	0.049314	1.08769
1007.22	0.493294	0.32668	0.666334	0.153294	0.843146
1007.95	0.0451172	-0.175494	0.456564	-0.342897	0.674993
1008.51	NaN	-0.446529	0.333141	-0.513167	0.424306
1008.69	0.463332	-0.0642677	0.680079	-0.28328	0.844143
1009.43	0.569591	0.413354	0.724569	0.253545	0.878117
1009.62	NaN	-0.0209432	0.728735	-0.202876	0.88667
1010.17	0.323247	0.163539	0.482455	-0.0149881	0.653781
1010.91	0.0454493	-0.165027	0.332077	-0.344487	0.545138
1011.47	NaN	-0.43675	0.316072	-0.673029	0.5403
1011.65	0.38841	-0.059004	0.620599	-0.265219	0.808676
1012.39	0.379372	0.210012	0.568505	0.0347552	0.747165
1013.13	0.340309	0.187957	0.503527	0.00790132	0.681096
1013.31	NaN	-0.4471	0.289067	-0.569455	0.398231
1013.87	0.0564059	-0.123058	0.248053	-0.311625	0.422766
1014.61	0.120967	-0.0473842	0.29831	-0.215145	0.452484
1014.98	NaN	-0.276548	0.468039	-0.367617	0.716625
1015.35	0.275204	0.0379631	0.478672	-0.164688	0.65122
1016.08	0.280218	0.109528	0.448958	-0.0457511	0.620021
1016.82	0.256067	0.0836989	0.4179	-0.0611353	0.573315
1017.01	NaN	0.0778521	0.896363	-0.0815722	0.999145
1017.56	0.153568	-0.0636929	0.510126	-0.228697	0.731089
1018.3	-0.0132742	-0.192777	0.149705	-0.349043	0.308181
1018.86	NaN	-0.436725	0.311786	-0.510591	0.498974
1019.04	0.0880759	-0.103557	0.275847	-0.29564	0.43705
1019.78	0.178673	0.0156741	0.341948	-0.144481	0.493509
1020.52	0.179743	0.0186709	0.353669	-0.123037	0.52114
1020.7	NaN	-0.347066	0.404991	-0.507219	0.604791
1021.26	-0.210452	-0.407692	0.049844	-0.584859	0.261935
1022	-0.303912	-0.460924	-0.138835	-0.621404	0.0030431
1022.8	NaN	-0.429181	0.312191	-0.532711	0.444506
1023.6	-0.000472287	-0.170543	0.173443	-0.317143	0.33634
1025.2	-0.0224073	-0.181348	0.151236	-0.341104	0.318172
1026.4	NaN	-0.402965	0.310444	-0.589404	0.375119
1026.8	-0.051204	-0.209904	0.0957896	-0.366891	0.262406
1028.4	-0.0682783	-0.213976	0.0960054	-0.375797	0.242523
1030	-0.0653005	-0.198504	0.10499	-0.343704	0.242523
1030.4	NaN	-0.44291	0.330997	-0.531012	0.490049
1031.6	0.206038	-0.0686785	0.416003	-0.276843	0.610837
1033.2	0.431066	0.2466	0.612942	0.0711475	0.778318
1034.8	0.43534	0.281488	0.609743	0.137588	0.775359
1036.4	0.4287	0.272841	0.586272	0.106459	0.739194
1038	0.43928	0.285073	0.576484	0.131429	0.766358
1038.56	NaN	-0.338248	0.414907	-0.555728	0.546786
1039.13	0.209988	-0.00476521	0.409048	-0.237267	0.557456
1040.26	0.414569	0.217813	0.577032	0.0509046	0.740999
1041.39	0.470611	0.299575	0.626826	0.132652	0.808551
1041.68	NaN	-0.0212544	0.744999	-0.117045	0.90638
1042.53	0.299997	0.118848	0.463613	-0.0344754	0.628489
1043.66	0.258014	0.0813909	0.416883	-0.04603	0.602086
1043.94	NaN	-0.0375314	0.682891	-0.183097	0.758924
1044.79	0.212009	0.0145587	0.39704	-0.151221	0.581685
1045.92	0.206944	0.0412569	0.371258	-0.119962	0.53182
1047.05	0.230605	0.083144	0.385071	-0.0953008	0.567701
1047.34	NaN	0.00788522	0.808349	-0.0963933	0.889015
1048.19	0.231029	0.0385328	0.435657	-0.129396	0.634338
1049.32	0.222138	0.0466779	0.387203	-0.122846	0.570033
1050.17	NaN	-0.156925	0.616574	-0.292205	0.751592
1050.45	0.334941	0.159124	0.503083	-0.0114967	0.656101
1051.58	0.231113	0.0413869	0.43883	-0.139326	0.627008
1052.43	NaN	-0.209451	0.580517	-0.329637	0.683369
1052.72	0.0124734	-0.171614	0.217149	-0.325557	0.414765
1053.85	0.0566452	-0.120878	0.237936	-0.289883	0.410627
1054.98	-0.0102116	-0.182042	0.171848	-0.34469	0.347797
1055.83	NaN	-0.467372	0.316403	-0.591492	0.484467
1056.11	0.199462	-0.0735893	0.412855	-0.284219	0.590562
1057.24	0.043548	-0.166546	0.312999	-0.330848	0.534591
1058.38	-0.0596169	-0.217976	0.1002	-0.372902	0.242148
1059.51	0.192252	-0.0744596	0.40531	-0.285444	0.580855
1060.64	0.0315471	-0.172342	0.299914	-0.322198	0.530856
1061.49	NaN	-0.41478	0.306934	-0.570959	0.473817
1061.77	-0.293638	-0.499592	-0.0391676	-0.658041	0.165847
1062.9	-0.0429698	-0.38803	0.181578	-0.610816	0.355039
1064.04	0.0656373	-0.108182	0.212706	-0.245763	0.356605
1064.32	NaN	-0.20818	0.524128	-0.285419	0.771986
1065.17	0.0735644	-0.0953253	0.241663	-0.270754	0.382522
1066.3	-0.0196889	-0.186376	0.133686	-0.347776	0.314283
1067.15	NaN	-0.429917	0.370976	-0.558453	0.452354
1067.43	-0.215474	-0.400943	-0.0118835	-0.567391	0.186024
1068	-0.135126	-0.324305	0.0427613	-0.505953	0.222659
1068.56	-0.0636932	-0.229533	0.0869596	-0.361295	0.248029
1069.7	-0.0635951	-0.231194	0.0866707	-0.375366	0.225643
1069.98	NaN	-0.527784	0.220214	-0.665696	0.312907
1070.83	-0.151268	-0.309074	0.015514	-0.443224	0.185521
1071.96	-0.15963	-0.301538	0.0215864	-0.446346	0.185664
1072.53	NaN	-0.618568	0.179594	-0.806492	0.242025
1073.09	-0.167235	-0.331174	-0.0089	-0.49117	0.138475
1074.23	-0.146616	-0.312774	0.00731723	-0.438695	0.170118
1075.64	NaN	-0.45081	0.294	-0.732232	0.437472
1076.49	-0.0692065	-0.236496	0.108118	-0.37546	0.25822
1077.62	-0.0753661	-0.243362	0.0909349	-0.38139	0.266114
1078.47	NaN	-0.433852	0.328422	-0.594796	0.514308
1078.75	-0.114683	-0.261632	0.0434047	-0.426941	0.201156
1079.89	-0.250905	-0.425371	-0.0695752	-0.599585	0.129362
1081.02	-0.316022	-0.473062	-0.158842	-0.615128	-0.00992941
1081.3	NaN	-0.433101	0.310592	-0.661366	0.599426
1082.15	0.1381	-0.0826759	0.342941	-0.305952	0.530385
1083.28	0.0338236	-0.169479	0.265389	-0.367866	0.453551
1084.13	NaN	-0.485843	0.293106	-0.591561	0.483773
1084.41	0.0803405	-0.111932	0.252095	-0.32193	0.426807
1085.55	0.136355	-0.0372385	0.295926	-0.173315	0.44456
1086.68	NaN	NaN	NaN	NaN	NaN
1086.96	NaN	0.213975	0.956516	0.00888396	1.05889
1087.81	0.5333	0.37658	0.699598	0.195552	0.855106
1088.94	0.627323	0.434772	0.810715	0.258124	0.964651
1089.79	NaN	0.296453	1.06232	0.155618	1.21057
1090.07	0.914999	0.662409	1.12393	0.452194	1.30308
1091.21	0.58119	0.35506	1.0166	0.193456	1.23493
1092.34	0.466452	0.312152	0.637078	0.172091	0.780085
1092.62	NaN	-0.0742715	0.644491	-0.313069	0.818195
1093.47	0.027124	-0.175743	0.303596	-0.352612	0.542022
1094.6	-0.0732332	-0.228283	0.0894554	-0.373384	0.226679
1094.89	NaN	-0.440626	0.362535	-0.538988	0.489862
1095.73	0.496802	-0.0561528	0.716645	-0.299993	0.893917
1096.87	0.538118	0.377625	0.705654	0.228301	0.875108
1098	0.49777	0.337644	0.674891	0.19835	0.849063
1098.25	NaN	-0.119849	0.609309	-0.235358	0.744532
1099	-0.0764352	-0.285036	0.274597	-0.450283	0.47419
1100	-0.00627171	-0.207774	0.186927	-0.397048	0.372436
1100.75	NaN	-0.306869	0.466334	-0.452545	0.612772
1101	0.185014	-0.000103588	0.360083	-0.175628	0.54224
1102	0.249228	0.0813076	0.412489	-0.0705164	0.577163
1103	0.25072	0.0817997	0.420197	-0.061794	0.573791
1103.25	NaN	-0.418813	0.305277	-0.600932	0.584883
1104	0.073319	-0.105298	0.257382	-0.282552	0.433142
1105	0.176558	0.0129363	0.33303	-0.146756	0.484705
1105.75	NaN	-0.170966	0.55611	-0.252713	0.765677
1106	0.0153039	-0.188188	0.225399	-0.341097	0.413002
1107	-0.0250293	-0.183756	0.131848	-0.329221	0.277302
1108	-0.0193991	-0.166357	0.14718	-0.268088	0.281713
1108.6	NaN	-0.0548224	0.728378	-0.173189	0.831908
1112.8	0.24723	0.0723436	0.416218	-0.0969154	0.588983
1114.6	NaN	-0.187937	0.555595	-0.352676	0.651798
1115.2	0.454762	0.188613	0.65958	-0.0240793	0.853698
1117.6	0.418794	0.236577	0.612587	0.0649011	0.809777
1120	0.357385	0.202115	0.518815	0.0466199	0.710788
1120.6	NaN	-0.44969	0.304121	-0.592614	0.391645
1122.4	0.393289	-0.0715942	0.614378	-0.29005	0.801756
1124.8	0.500389	0.344964	0.659942	0.20276	0.83667
1126	NaN	-0.108716	0.904328	-0.255291	1.07803
1130.17	0.469632	0.19249	0.698482	-0.0189263	0.888944
1131.21	0.566808	0.409929	0.739599	0.256955	0.902513
1131.73	NaN	-0.175754	0.622366	-0.267837	0.750382
1132.25	0.220112	0.0549947	0.386322	-0.101428	0.54613
1133.29	0.450092	0.201751	0.662056	-0.00992781	0.846714
1134.07	NaN	0.159925	0.938622	0.0447069	1.07974
1134.33	0.532491	0.364115	0.691498	0.210957	0.872496
1135.38	0.97546	0.513174	1.1952	0.282991	1.38415
1136.42	1.08988	0.927857	1.24852	0.805472	1.41992
1136.68	NaN	-0.294046	0.476273	-0.417912	0.644945
1137.46	0.436363	0.0834156	0.664232	-0.135407	0.821247
1138.5	0.10835	-0.124655	0.567738	-0.294369	0.769523
1139.28	NaN	-0.378569	0.376834	-0.573122	0.539401
1139.54	0.294935	-0.0182515	0.513294	-0.224832	0.673438
1140.59	0.23281	0.03575	0.436212	-0.139641	0.603275
1141.63	0.367851	0.123129	0.56999	-0.093598	0.740052
1142.67	0.221036	0.0100868	0.468818	-0.16711	0.697083
1143.71	-0.652191	-0.87085	0.135955	-1.0735	0.381879
1144.75	0.146759	-0.777687	0.370834	-0.996172	0.541153
1145.8	0.264073	0.114537	0.435545	-0.0289402	0.593604
1146.84	0.268632	0.111463	0.422304	-0.0445888	0.593604
1147.88	0.425037	0.226403	0.618902	0.0298568	0.790336
1148.92	0.227818	-0.000136675	0.516981	-0.164077	0.740295
1149.97	0.10993	-0.0544665	0.267893	-0.194666	0.416932
1151.01	0.0607861	-0.108513	0.220565	-0.256297	0.386712
1152.05	0.226306	-0.00490669	0.427214	-0.194611	0.598535
1153.09	0.334888	0.170109	0.503946	0.00987196	0.652351
1154.13	0.320172	0.148326	0.485836	-0.000796578	0.644539
1155.18	0.309154	0.146604	0.475002	-0.0198203	0.645125
1156.22	0.343006	0.179457	0.516132	0.0211006	0.66603
1157.26	0.445274	0.271061	0.614308	0.116057	0.759104
1158.3	0.00161051	-0.227851	0.497188	-0.402343	0.712256
1159.35	-0.0289236	-0.197034	0.141718	-0.366246	0.305798
1160.39	-0.0167963	-0.18544	0.154029	-0.33165	0.298003
1161.43	0.153425	-0.0693607	0.352194	-0.273242	0.50459
1162.47	0.335892	0.165219	0.491995	-0.0187799	0.656696
1163.52	0.216566	0.0263318	0.419751	-0.166633	0.610073
1164.56	0.000467271	-0.190775	0.198419	-0.343448	0.376594
1165.6	-0.0403659	-0.194831	0.124077	-0.355889	0.274894
1166.64	-0.0745192	-0.229949	0.0864546	-0.386187	0.255617
1167.68	0.0986482	-0.127251	0.293743	-0.332835	0.456242
1168.73	0.0712582	-0.108148	0.231812	-0.27478	0.405587
1169.77	0.04711	-0.12506	0.197582	-0.274598	0.341148
1170.81	0.333996	0.018595	0.534764	-0.195258	0.711985
1171.85	0.327307	0.152691	0.509032	-0.0401092	0.688591
1172.9	0.257546	0.0728407	0.414373	-0.0608965	0.611997
1173.16	NaN	-0.016018	0.742467	-0.166873	0.880572
1173.42	0.447952	0.263609	0.614681	0.102933	0.792213
1173.94	0.0245211	-0.187215	0.505521	-0.350306	0.723197
1174.46	-0.0922748	-0.256647	0.0692627	-0.390149	0.216229
1174.98	-0.0596152	-0.227208	0.0939929	-0.386612	0.247757
1175.76	NaN	-0.466739	0.328038	-0.574481	0.449086
1176.02	-0.0729165	-0.241508	0.086065	-0.385973	0.230836
1177.06	-0.200286	-0.374519	-0.0201535	-0.545596	0.168332
1177.85	NaN	-0.638448	0.116598	-0.706407	0.195842
1178.11	-0.104517	-0.299442	0.0788721	-0.483415	0.267934
1180.45	-0.0802125	-0.246909	0.0980301	-0.405443	0.275259
1183.06	-0.0380713	-0.212513	0.149769	-0.370456	0.311092
1184.36	0.052716	-0.119713	0.235306	-0.274408	0.426695
1188.06	0.164169	-0.0280013	0.35877	-0.230354	0.498367
1189.95	0.462784	0.20476	0.670873	-0.0105921	0.850022
1191.83	0.359108	0.16234	0.582009	-0.00109961	0.80591
1193.72	0.394734	0.21412	0.565019	0.0411605	0.743887
1195.6	0.312526	0.133556	0.506574	-0.037091	0.698564
1197.48	0.189871	0.0198335	0.355233	-0.144884	0.550472
1199.37	0.286244	0.0926668	0.460335	-0.0761726	0.624201
1201.25	0.182346	0.0112098	0.396528	-0.166508	0.566821
1203.14	0.177895	0.0160901	0.339917	-0.154499	0.48115
1205.02	0.387185	0.165678	0.576938	-0.0218387	0.743274
1206.91	0.306311	0.118378	0.514094	-0.0534304	0.70828
1208.79	0.276294	0.117667	0.431426	-0.0417052	0.594978
1210.67	0.0789621	-0.120472	0.330087	-0.299265	0.522475
1212.56	-0.0647125	-0.218116	0.104913	-0.364788	0.262446
1214.44	-0.201627	-0.375278	-0.0217254	-0.539385	0.157735
1216.33	-0.178613	-0.336226	-0.00102686	-0.490135	0.178049
1218.21	-0.202403	-0.363526	-0.0352085	-0.519762	0.147649
1220.1	-0.364407	-0.543661	-0.168175	-0.713811	-0.00787126
1221.98	-0.386455	-0.541776	-0.219675	-0.710579	-0.061752
1223.86	-0.435049	-0.597792	-0.269645	-0.759977	-0.113142
1225.75	-0.300518	-0.507302	-0.117136	-0.711954	0.0469679
1227.63	-0.285946	-0.447514	-0.117422	-0.602756	0.0438135
1229.52	0.23917	-0.31524	0.45961	-0.522883	0.611968
1231.4	-0.115752	-0.335396	0.332529	-0.516886	0.565427
1233.28	0.0587797	-0.244844	0.273512	-0.458274	0.442926
1235.17	-0.123504	-0.324045	0.169511	-0.503356	0.393707
1237.05	0.165674	-0.228113	0.377237	-0.45852	0.54783
1238.94	-0.0435773	-0.244659	0.271952	-0.443717	0.500033
1240.82	-0.0348033	-0.200752	0.134224	-0.377498	0.283115
1242.71	0.478361	-0.00511233	0.689507	-0.204585	0.889865
1244.49	0.800472	0.560735	1.00399	0.351549	1.1732
1246.12	0.539688	0.315643	0.907239	0.152132	1.10096
1247.76	0.750355	0.417754	0.98504	0.203214	1.16039
1249.39	0.420118	0.186683	0.871902	-0.00530646	1.10723
1251.03	0.329625	0.171415	0.492912	-0.00587662	0.648774
1252.66	0.460343	0.281212	0.63726	0.109423	0.820753
1254.29	0.281325	0.0763678	0.549031	-0.0877	0.763965
1255.93	0.304344	0.12219	0.487533	-0.0480966	0.64063
1257.56	0.0957858	-0.115575	0.364185	-0.287456	0.585399
1259.19	0.0536222	-0.113033	0.216343	-0.265196	0.380141
1260.67	0.108233	-0.0563528	0.264205	-0.219919	0.405173
1262.12	-0.116887	-0.321866	0.136323	-0.493959	0.334223
1263.56	0.226626	-0.225065	0.454887	-0.456138	0.626001
1265.01	0.0655277	-0.145172	0.338438	-0.315319	0.563593
1266.45	-0.124454	-0.299223	0.0499015	-0.470206	0.218307
1267.9	-0.169339	-0.324292	-0.00440366	-0.500546	0.133646
1269.34	0.166163	-0.176809	0.394528	-0.40385	0.574925
1270.79	-0.0197194	-0.243119	0.29474	-0.411513	0.496785
1272.23	-0.0958718	-0.260483	0.06887	-0.425051	0.233641
1273.68	-0.094938	-0.263715	0.0630293	-0.420237	0.22527
1275.12	-0.0588491	-0.227702	0.104861	-0.391116	0.272846
1276.57	-0.165793	-0.359561	0.0189237	-0.537951	0.23011
1278.01	-0.23775	-0.399378	-0.0828767	-0.566876	0.0773062
1279.46	-0.0377839	-0.271183	0.168407	-0.478725	0.340955
1280.9	-0.0683778	-0.241927	0.131887	-0.420046	0.290978
1282.35	-0.0257506	-0.205874	0.149555	-0.379128	0.314765
1283.79	0.126553	-0.0508665	0.299903	-0.226897	0.482169
1285.24	0.637348	0.176901	0.860375	-0.0337177	1.04901
1287.11	0.509401	0.300853	0.773438	0.131544	0.974272
1289.06	0.364682	0.213798	0.529156	0.0399203	0.686702
1291.01	0.375572	0.205255	0.541642	0.0259968	0.700904
1292.96	0.391245	0.230064	0.552538	0.0756595	0.717578
1294.9	0.0552234	-0.16481	0.407262	-0.317484	0.631912
1296.85	-0.105311	-0.261823	0.0603079	-0.421443	0.244316
1298.8	-0.0921294	-0.257432	0.0680902	-0.401361	0.237813
1300.75	-0.0378157	-0.201777	0.125103	-0.348234	0.300769
1302.7	-0.0803019	-0.25234	0.0851245	-0.414568	0.234325
1304.64	-0.265554	-0.442381	-0.0664129	-0.61317	0.124071
1307.08	0.060081	-0.33634	0.268113	-0.553209	0.443292
1309.56	-0.201483	-0.42346	0.176409	-0.605118	0.386105
1312.04	-0.177105	-0.366698	-0.00565981	-0.554817	0.158962
1314.51	-0.193405	-0.370275	-0.0305805	-0.536822	0.133639
1316.99	-0.115353	-0.295633	0.0539652	-0.48956	0.215697
1319.25	-0.107159	-0.252363	0.0584092	-0.396424	0.217063
1321.16	0.018964	-0.179539	0.203631	-0.355864	0.377667
1323.06	0.113638	-0.0492905	0.269534	-0.231023	0.433418
1324.97	0.178229	0.0236601	0.345862	-0.132618	0.522025
1326.88	-0.050814	-0.267391	0.217772	-0.426586	0.425287
1328.79	-0.211138	-0.382332	-0.0534667	-0.559339	0.110231
1330.7	-0.156547	-0.332866	0.010112	-0.501956	0.172285
1332.6	0.113468	-0.138732	0.318144	-0.361265	0.48948
1334.51	0.121678	-0.0361041	0.287665	-0.208945	0.455766
1336.42	-0.270747	-0.49083	0.0830472	-0.685145	0.293885
1338.33	-0.217238	-0.416614	-0.0376527	-0.633271	0.152794
1340.23	-0.0424949	-0.221861	0.128345	-0.360047	0.292817
1342.14	0.195054	-0.0193932	0.372587	-0.220389	0.562765
1344.05	0.280346	0.119549	0.437189	-0.0401262	0.597208
1345.96	0.0183819	-0.199633	0.303038	-0.376323	0.48951
1347.87	-0.13409	-0.297881	0.0317929	-0.469461	0.192866
1349.99	-0.16745	-0.338793	-0.00602768	-0.469566	0.140313
1352.12	NaN	-0.744596	0.0159893	-0.951255	0.171595
1354.24	-0.14229	-0.380571	0.0569719	-0.567864	0.227116
1356.36	-0.335026	-0.536754	-0.0446081	-0.700701	0.166876
1358.49	-0.325961	-0.501456	-0.155529	-0.66218	0.016119
1360.61	-0.0922193	-0.286142	0.0976469	-0.478374	0.261306
1364.86	-0.0436742	-0.211491	0.129311	-0.357893	0.271545
1366.98	0.255233	-0.0515925	0.470292	-0.288624	0.641117
1369.1	0.0716433	-0.141719	0.378219	-0.312934	0.573567
1371.23	0.0678429	-0.109496	0.235694	-0.28335	0.384004
1373.35	-0.278543	-0.495856	0.119555	-0.649235	0.332278
1375.47	-0.476057	-0.658324	-0.301292	-0.807839	-0.137135
1377.6	-0.39188	-0.593855	-0.210038	-0.756041	-0.0470075
1379.84	-0.125903	-0.363051	0.075868	-0.593887	0.240289
1382.1	0.0204037	-0.142101	0.187963	-0.305963	0.343407
1384.35	-0.104007	-0.289751	0.0891943	-0.458239	0.253169
1386.61	-0.172896	-0.365638	0.0118334	-0.550312	0.176993
1391.12	-0.281364	-0.45605	-0.0622275	-0.634457	0.131984
1393.37	-0.344727	-0.490166	-0.200532	-0.654771	-0.0360029
1395.63	NaN	-0.6722	0.0836277	-0.781632	0.255158
1397.88	-0.288486	-0.452376	-0.126813	-0.59525	0.0109853
1400.14	NaN	-0.54502	0.20076	-0.660359	0.370718
1402.4	-0.282283	-0.449027	-0.0957117	-0.628479	0.0574406
1404.65	-0.299109	-0.455992	-0.132781	-0.627801	0.0238589
1406.66	-0.123034	-0.328075	0.0708184	-0.506286	0.232244
1408.15	-0.210695	-0.408531	0.00121313	-0.58005	0.182405
1409.64	-0.323086	-0.480329	-0.159159	-0.648674	-0.0109276
1411.13	-0.233534	-0.415089	-0.0652854	-0.587102	0.110022
1412.61	-0.233984	-0.396138	-0.0762257	-0.554774	0.0954855
1414.1	-0.274765	-0.433681	-0.110309	-0.596161	0.0412324
1415.59	-0.168641	-0.360999	0.0182611	-0.539489	0.185246
1417.08	-0.105187	-0.264802	0.072989	-0.413548	0.213662
1418.57	-0.104262	-0.25047	0.0671365	-0.40457	0.183893
1420.05	NaN	0.384482	1.12651	0.266051	1.23873
1421.54	0.369827	0.157756	0.790506	-0.0250255	0.99453
1423.03	0.264171	0.104194	0.416345	-0.0442776	0.55369
1424.52	NaN	-0.0342563	0.696878	-0.181024	0.779551
1426.04	-0.0298944	-0.248003	0.346361	-0.417108	0.564211
1428.06	-0.133433	-0.286474	0.0176081	-0.409335	0.156144
1430.08	NaN	-0.121346	0.603348	-0.223755	0.698341
1432.11	0.181665	0.00674725	0.348373	-0.147558	0.502268
1434.13	0.259301	0.0728056	0.442693	-0.0927544	0.601381
1436.15	0.310725	0.141892	0.480044	-0.00960053	0.621768
1438.17	-0.118108	-0.345697	0.322134	-0.490375	0.552946
1440.2	-0.0699256	-0.282873	0.112838	-0.458652	0.305418
1442.22	-0.0128708	-0.159956	0.146727	-0.336599	0.325482
1444.24	NaN	NaN	NaN	NaN	NaN
1446.26	NaN	-0.628873	0.119863	-0.733484	0.213271
1448.28	0.0959778	-0.262269	0.313097	-0.47255	0.501747
1450.31	0.113942	-0.0484126	0.279915	-0.214856	0.468598
1452.24	0.248143	0.0290866	0.442884	-0.166956	0.612817
1453.85	0.563998	0.310784	0.768077	0.0913711	0.948787
1455.47	0.457695	0.27004	0.692613	0.105701	0.910478
1457.08	0.484704	0.295725	0.659073	0.153441	0.802374
1458.7	0.321856	0.12699	0.561363	-0.03919	0.735438
1460.32	0.246352	0.0886516	0.405962	-0.0730918	0.550503
1461.93	0.102798	-0.0839596	0.302199	-0.247126	0.504854
1463.55	0.43801	0.0258277	0.646624	-0.20522	0.813052
1465.16	0.589672	0.418244	0.746589	0.258085	0.888568
1466.78	0.288997	0.0710994	0.624263	-0.0899831	0.829173
1468.4	0.0291107	-0.156307	0.228476	-0.311562	0.419811
1470.01	0.122272	-0.0765143	0.319969	-0.251695	0.483763
1471.63	-0.235547	-0.452393	0.222363	-0.649992	0.450108
1473.25	-0.0444645	-0.342598	0.189662	-0.595311	0.353075
1474.86	-0.237619	-0.450445	0.080885	-0.61614	0.292057
1476.48	-0.199785	-0.386671	-0.0177063	-0.572879	0.16067
1478.1	-0.456974	-0.683897	-0.130179	-0.849297	0.0879561
1479.71	-0.0095243	-0.576537	0.212654	-0.769684	0.36309
1481.33	-0.0664833	-0.250046	0.140017	-0.407221	0.338087
1482.94	-0.206948	-0.36707	-0.0333698	-0.523991	0.138652
1484.56	-0.206294	-0.364846	-0.0267389	-0.525672	0.12496
1486.18	0.41326	-0.191859	0.636942	-0.41299	0.808618
1487.79	0.371918	0.194715	0.570024	0.0352866	0.775791
1489.41	0.500532	0.275234	0.695407	0.0719337	0.86764
1491.03	0.338197	0.127601	0.59346	-0.0194658	0.811095
1492.64	0.69653	0.232116	0.918435	0.0337682	1.10194
1494.26	0.586468	0.383162	0.830339	0.205124	1.02324
1495.87	0.361261	0.180159	0.557966	0.011196	0.739987
1497.49	0.46654	0.255369	0.64806	0.0754665	0.817375
1499.1	0.173238	-0.0345091	0.537611	-0.202031	0.770847
1500.72	0.0820954	-0.0734556	0.23137	-0.202137	0.369573
1502.34	NaN	0.3074	1.06663	0.203779	1.31751
1503.95	0.500324	0.308584	0.731947	0.121255	0.920852
1505.57	0.48591	0.316616	0.643176	0.170485	0.809311
1507.19	0.470488	0.305459	0.635375	0.15361	0.794913
1508.8	0.670167	0.413839	0.8722	0.208719	1.03857
1510.42	0.537606	0.345358	0.791376	0.167057	0.996306
1512.04	0.507994	0.347521	0.673194	0.195975	0.825806
1513.65	0.392031	0.199474	0.593235	0.0472491	0.748197
1515.27	0.382832	0.220648	0.546961	0.0621275	0.722339
1516.88	0.255059	0.0671017	0.453571	-0.0923065	0.625593
1518.5	0.303837	0.120099	0.480558	-0.0645223	0.631995
1520.11	0.436439	0.267056	0.611091	0.0955087	0.795912
1521.73	0.417283	0.251791	0.589682	0.0898424	0.749526
1523.35	0.443338	0.271203	0.60631	0.117363	0.775874
1524.96	1.04858	0.456917	1.28495	0.232662	1.44911
1526.58	0.583689	0.360989	1.17546	0.186899	1.4127
1528.19	0.552878	0.380217	0.725641	0.195374	0.89459
1529.81	0.333791	0.116217	0.613273	-0.0498916	0.833556
1531.43	0.11155	-0.060726	0.295826	-0.234259	0.466704
1533.04	0.334997	0.034647	0.55008	-0.203142	0.714474
1534.66	0.20106	-0.00903938	0.457716	-0.191278	0.66393
1536.28	0.43643	0.0947657	0.660158	-0.150993	0.827891
1537.89	0.155551	-0.0620978	0.541832	-0.254872	0.765762
1539.51	0.0715582	-0.092259	0.215095	-0.249783	0.36984
1541.13	0.350439	0.0605256	0.56188	-0.160191	0.713386
1542.74	0.480333	0.32357	0.635098	0.156841	0.769552
1544.36	0.430941	0.265592	0.598347	0.0985842	0.763663
1545.98	0.404963	0.238724	0.560279	0.0757123	0.711584

## Sheet: PSU Solver DSDP 607
Age	d18Osw	sg1	sgn1	sg2	sgn2
153.46	0.473	0.343223	0.623327	0.226277	0.772494
154.83	0.761026	0.420714	0.907273	0.263977	1.03864
157.221	0.422783	0.253276	0.846377	0.118731	0.990007
161.971	0.306591	0.189443	0.431151	0.0706163	0.552723
171.471	0.302921	0.186127	0.426281	0.0742234	0.548325
173.561	0.523333	0.304112	0.682464	0.128895	0.809557
179.511	0.589107	0.470938	0.707051	0.366873	0.821608
183.081	0.664853	0.533519	0.791396	0.399025	0.911176
187.551	0.638831	0.515383	0.766071	0.39242	0.885369
191.512	0.371267	0.213283	0.615861	0.0984741	0.776244
194.172	-0.0243928	-0.187783	0.305393	-0.321044	0.458672
197.182	0.0884293	-0.120171	0.251247	-0.286931	0.392109
200.302	0.0445178	-0.0861832	0.184342	-0.219118	0.346796
205.763	-0.161457	-0.310876	0.00713023	-0.438568	0.149797
211.293	0.59135	-0.233813	0.742188	-0.397892	0.871197
226.305	0.357362	0.202814	0.67252	0.0615026	0.821193
235.104	0.19762	0.0611242	0.328135	-0.042867	0.444271
243.345	1.09357	0.146212	1.25259	-0.0168187	1.38524
248.515	1.24701	1.05441	1.50026	0.921703	1.65296
255.235	1.19247	1.01976	1.47725	0.893634	1.66069
258.265	0.174963	0.00895516	1.10971	-0.116557	1.28981
263.885	0.166895	0.0116248	0.330025	-0.121033	0.466875
270.186	0.146502	0.00160465	0.310787	-0.127359	0.457791
272.706	0.155235	0.0287928	0.271729	-0.0881555	0.40014
274.526	0.548535	0.180128	0.695893	0.0123138	0.836489
277.326	0.605961	0.490332	0.721055	0.386991	0.844491
279.316	0.629088	0.506313	0.738544	0.398853	0.849992
281.946	0.576606	0.456952	0.700426	0.336732	0.813649
284.997	0.0202939	-0.142667	0.554175	-0.270978	0.701818
292.148	-0.0907525	-0.203693	0.0302045	-0.323977	0.14782
298.908	-0.0962505	-0.205426	0.0242946	-0.31542	0.132451
301.458	-0.268367	-0.402044	-0.109227	-0.522793	0.0553815
312.778	-0.292085	-0.409428	-0.170629	-0.522793	-0.0554388
317.508	-0.337815	-0.651596	-0.145912	-0.803425	-0.0221562
325.389	-0.540632	-0.710023	-0.207002	-0.83323	-0.051366
328.959	0.0052773	-0.631751	0.168832	-0.790948	0.282703
331.699	0.34842	0.141734	0.513946	-0.0533637	0.65177
342.909	0.367283	0.228386	0.508306	0.121398	0.642871
346.589	0.656091	0.317692	0.820529	0.168635	0.937889
350.019	0.681723	0.55594	0.800873	0.439091	0.923394
352.899	0.747516	0.615249	0.866106	0.481824	0.983603
357.65	0.15058	-0.0106608	0.788497	-0.127077	0.9367
360.37	0.27799	0.0691669	0.433182	-0.0943458	0.568463
362.41	0.21157	0.0728428	0.381744	-0.0455486	0.54388
364.1	0.520094	0.147565	0.688533	8.22749e-05	0.814978
368.54	0.404748	0.25143	0.619675	0.127709	0.762496
371.73	0.141861	-0.0036857	0.339481	-0.125523	0.497208
374.82	0.266542	0.0627991	0.410987	-0.0901098	0.546763
378.659	0.130403	-0.0278887	0.345445	-0.149396	0.510576
383.089	0.191532	0.0359899	0.332533	-0.114811	0.464087
386.439	-0.128106	-0.331286	0.200578	-0.482515	0.394809
391.599	-0.110329	-0.291572	0.0361628	-0.453979	0.153542
394.159	-0.323579	-0.479945	-0.0392381	-0.606209	0.11136
397.129	-0.428727	-0.552125	-0.313728	-0.678335	-0.197811
399.679	-0.500359	-0.628596	-0.372665	-0.749422	-0.258764
402.189	-0.580095	-0.707109	-0.462827	-0.822109	-0.33097
405.959	-0.138861	-0.615445	0.0169147	-0.788666	0.180188
411.109	0.385521	-0.0836002	0.541225	-0.241352	0.675531
416.969	0.524889	0.39813	0.64591	0.262586	0.745993
420.378	0.540774	0.421961	0.652512	0.306913	0.754361
422.458	0.962776	0.585861	1.12262	0.387001	1.26722
427.878	1.05622	0.922163	1.18627	0.789095	1.30506
430.548	0.92077	0.767924	1.112	0.637975	1.2723
433.378	0.832877	0.716247	0.95529	0.601657	1.07105
436.578	0.855405	0.730654	0.975415	0.617225	1.08135
439.127	0.814461	0.689884	0.935405	0.567959	1.0406
441.767	0.882113	0.742094	1.00848	0.611155	1.12386
444.937	0.692372	0.532342	0.929703	0.399749	1.08667
448.678	0.620754	0.503931	0.734407	0.384238	0.850728
453.949	0.639485	0.518116	0.757714	0.411984	0.871321
458.68	0.578138	0.445398	0.70877	0.316445	0.837022
461.669	0.395873	-0.00951715	0.580103	-0.162013	0.712499
465.66	0.0988343	-0.0671939	0.492512	-0.191793	0.659465
466.17	0.0947642	-0.0659396	0.495889	-0.1959	0.655285
472.439	0.407808	0.0101535	0.569494	-0.160869	0.689863
475.488	0.269335	0.113867	0.498606	-0.0197473	0.660943
480.828	0.00226097	-0.147316	0.208405	-0.26992	0.376515
487.967	-0.177477	-0.302827	-0.0294898	-0.428081	0.10912
497.047	-0.0473189	-0.236564	0.103391	-0.404444	0.221621
507.036	0.0394444	-0.292857	0.334638	-0.489146	0.49172
524.105	NaN	-0.575461	0.546065	-0.72452	0.635404
527.425	0.622777	0.370343	0.842388	0.175474	1.02603
533.405	NaN	0.334925	1.0691	0.233459	1.27107
536.144	0.696268	0.5338	0.860856	0.402798	1.03844
538.903	NaN	0.428344	1.28665	0.280042	1.43381
544.302	NaN	0.537781	1.28813	0.401196	1.45734
548.741	0.889586	0.732427	1.06475	0.584434	1.24035
549.902	NaN	0.541812	1.3374	0.456262	1.4462
555.701	NaN	0.17817	0.715734	0.00120444	0.80317
561.271	0.133321	-0.0347613	0.4494	-0.14484	0.603116
570.521	0.0368055	-0.0797195	0.15636	-0.202134	0.258062
578.44	0.255371	0.0176468	0.418706	-0.161388	0.55392
584.331	0.530926	0.351062	0.70291	0.19097	0.837675
588.671	0.612634	0.450391	0.749374	0.313199	0.880274
589.641	0.53492	-0.269693	0.728013	-0.471174	0.860212
595.501	NaN	-0.47192	0.871744	-0.676491	1.0034
598.241	0.331972	0.172633	0.647538	0.0588328	0.808018
598.811	0.206036	-0.145145	0.406902	-0.29513	0.557315
601.86	0.268005	-0.122508	0.434381	-0.27963	0.553438
602.24	0.427759	0.130277	0.581665	-0.103506	0.717141
603.509	0.0889093	-0.0630611	0.526978	-0.186313	0.69412
604.179	0.060835	-0.0595702	0.183263	-0.177436	0.291143
606.199	0.144034	0.0219745	0.263688	-0.121021	0.403924
607.639	0.42514	0.109022	0.602323	-0.0889788	0.722172
610.13	0.0594394	-0.0954943	0.533829	-0.224678	0.681752
611.469	-0.108778	-0.238642	0.0246555	-0.358841	0.13921
612.719	0.0675	-0.167784	0.228705	-0.31432	0.353378
613.969	0.212148	0.0843933	0.34446	-0.0476378	0.441678
615.089	-0.246815	-0.404888	0.251488	-0.540427	0.405975
616.43	0.685916	-0.264092	0.838435	-0.465928	0.984627
618.92	0.758965	0.630165	0.887214	0.507853	1.02059
620.12	1.26807	0.89661	1.40875	0.662913	1.53533
625.359	1.29439	1.17843	1.42035	1.05492	1.53683
627.049	1.1917	1.05852	1.31698	0.937863	1.44481
631.339	1.15739	1.01275	1.28831	0.840629	1.42501
633.469	1.14794	0.980586	1.2909	0.805627	1.43077
633.999	NaN	0.466737	1.40857	0.383288	1.58272
637.89	0.809944	0.646036	0.980985	0.506684	1.14568
641.6	NaN	0.413161	1.17268	0.333461	1.3625
643.589	0.6194	0.495429	0.740502	0.384722	0.857352
646.359	0.751009	0.570456	0.895425	0.422192	1.0162
648.949	0.625105	0.456915	0.807238	0.316398	0.968697
657.669	0.547607	0.407336	0.698414	0.283055	0.842041
661.25	0.444092	0.284511	0.591401	0.145172	0.727132
670.32	0.384965	0.241445	0.543503	0.116843	0.709066
674.459	0.268206	0.08863	0.472277	-0.0448182	0.666066
679.799	NaN	-0.11712	0.747262	-0.267174	0.996784
682.169	0.0576344	-0.0704721	0.183346	-0.200316	0.317215
685.279	0.0472514	-0.0657275	0.165966	-0.187609	0.280819
688.32	0.219287	0.040753	0.362093	-0.0859372	0.475676
691.359	0.235365	0.112554	0.359368	-0.00365624	0.462651
694.399	0.336402	0.183345	0.46888	0.0536085	0.592292
697.599	0.159286	-0.00845173	0.390851	-0.133279	0.55734
703.618	0.531572	0.146042	0.803635	-0.0498643	0.940654
707.327	0.515544	0.295992	0.772173	0.112469	0.929631
709.097	NaN	-0.0202034	0.712615	-0.145539	0.921833
711.047	0.615597	0.326936	1.0235	0.126215	1.22869
715.007	0.863501	0.537054	1.09236	0.384962	1.27637
715.998	NaN	0.379839	1.23699	0.151946	1.51153
718.638	0.746083	0.590436	0.922841	0.43778	1.11005
719.298	NaN	0.552231	1.63388	0.353529	1.83802
721.697	NaN	0.728232	1.60878	0.577689	1.83802
722.198	NaN	0.413949	1.69778	0.295501	1.94437
724.467	1.26216	0.635495	1.48305	0.481677	1.66567
725.297	NaN	0.41393	1.6509	0.27766	1.81698
727.807	0.783071	0.60523	0.974211	0.47582	1.15574
728.597	NaN	0.220964	1.17442	-0.00361365	1.38984
731.207	0.513618	0.395247	0.62774	0.28589	0.749853
734.497	0.611976	0.427186	0.862074	0.286708	1.06102
736.698	NaN	0.185108	1.08668	0.0771589	1.18135
737.797	0.441109	0.296046	0.593112	0.136103	0.723278
738.497	NaN	0.164878	1.11487	-0.11059	1.29257
741.067	0.740024	0.583871	0.914311	0.463116	1.08721
742.197	NaN	0.0217072	1.08929	-0.167385	1.25433
744.497	NaN	0.107343	1.17602	-0.149122	1.36691
746.827	0.758584	0.418203	0.970197	0.255584	1.14725
747.197	NaN	0.265742	1.16807	0.0884383	1.30727
750.197	NaN	-0.541131	0.880589	-0.704162	1.14056
753.427	-0.128903	-0.348846	0.56236	-0.512991	0.708205
754.297	NaN	-0.485153	0.950193	-0.637763	1.17099
757.347	0.592207	0.448149	0.744465	0.319555	0.918275
758.497	NaN	0.0342055	0.867959	-0.132153	1.17099
762.227	0.35504	0.210827	0.497744	0.0607665	0.635347
763.597	NaN	-0.603295	0.646235	-0.93535	0.828738
766.397	NaN	-0.550317	0.709711	-0.93535	0.820102
775.097	0.427922	0.307937	0.549326	0.211001	0.652586
781.598	0.557108	0.392977	0.694336	0.246185	0.818196
786.238	0.721634	0.574041	0.857397	0.444455	0.967894
789.488	0.702711	0.56809	0.828107	0.444997	0.956674
794.088	0.671997	-0.0502946	0.906359	-0.401882	1.12809
802.407	0.770509	0.636959	0.923636	0.504722	1.10915
803.297	NaN	0.490644	1.29041	0.323409	1.47459
804.397	NaN	0.185163	1.23167	-0.347155	1.43468
805.297	NaN	0.185259	0.729535	0.134228	0.80273
805.447	-0.130125	-0.350923	0.473161	-0.497308	0.638335
805.997	NaN	-0.479022	1.56728	-0.799704	1.78669
810.797	NaN	0.00808674	1.49386	-0.180927	1.66034
812.317	1.24304	0.235617	1.47627	0.0862551	1.66034
813.297	NaN	-0.243204	1.69246	-0.411994	1.77829
821.808	0.0414684	-0.0994046	0.206656	-0.230295	0.387154
827.128	0.0879734	-0.0769733	0.25697	-0.207638	0.432912
828.298	NaN	-0.177689	0.676073	-0.341084	0.753421
832.938	0.153652	-0.285028	0.415804	-0.450858	0.601277
845.539	0.254937	0.0850055	0.446752	-0.06893	0.62386
846.799	NaN	-0.53402	0.591931	-0.696778	0.840362
851.099	-0.14631	-0.331505	0.0508274	-0.462617	0.234842
852.198	NaN	-0.35785	0.526752	-0.551635	0.70304
856.099	NaN	-0.17493	0.555446	-0.347206	0.70304
857.499	NaN	-0.464486	0.498804	-0.529483	0.70304
863.13	0.80033	-0.207749	0.962775	-0.384761	1.07396
869.23	0.652112	0.433418	0.850921	0.213991	1.01662
872.81	0.554224	0.368114	0.739675	0.181455	0.883402
873.3	NaN	0.137506	0.819427	-0.122735	0.927829
880.59	0.484084	-0.0371525	0.939783	-0.193806	1.14985
888.249	0.801274	-0.00711667	1.02549	-0.175887	1.1984
891.999	NaN	0.533761	1.29578	0.472392	1.41397
893.599	NaN	0.344812	1.09783	0.269506	1.25954
897.001	NaN	0.361075	1.08052	0.277918	1.18438
899.201	NaN	0.598114	1.15483	0.49552	1.21597
902.261	0.491494	0.345514	0.770743	0.207952	1.0096
908.001	0.47143	0.332413	0.626422	0.173226	0.774316
909.001	NaN	0.131551	0.803549	-0.0146013	1.11996
910.901	0.470098	0.355451	0.586984	0.23591	0.701249
913.251	0.515247	0.290713	0.952955	0.144511	1.1533
915.971	0.797815	0.322611	1.03511	0.15585	1.19361
916.501	NaN	0.554901	1.26309	0.341389	1.35746
918.601	NaN	-1.16987	-0.424802	-1.31236	-0.318644
922.3	NaN	-1.10483	-0.0421677	-1.31236	0.0605691
924.74	-0.299133	-0.424252	-0.181503	-0.516089	-0.0742229
925.301	NaN	0.840628	1.58199	0.670853	1.72105
926.501	NaN	-0.200513	1.54764	-0.309112	1.72105
928.011	-0.0061488	-0.13282	0.121332	-0.263121	0.242495
931.981	-0.0593029	-0.16308	0.0517746	-0.270097	0.243336
932.001	NaN	-0.264052	1.11098	-0.370199	1.20482
934.302	NaN	-0.188496	1.05295	-0.30841	1.20482
935.822	0.299606	0.0546602	0.514642	-0.10209	0.682191
936.802	NaN	-0.506588	0.707269	-0.666868	0.895086
939.132	-0.257	-0.362137	-0.1299	-0.479102	-0.0182859
939.502	NaN	-0.212542	0.882459	-0.382343	1.0683
942.242	0.421241	0.0162099	0.64361	-0.144879	0.827954
942.602	NaN	-0.235619	0.839626	-0.362235	1.02402
945.312	-0.0704066	-0.202531	0.0510408	-0.324239	0.177319
948.162	-0.161144	-0.550781	0.022708	-0.75983	0.165316
954.383	-0.406497	-0.627214	-0.00984115	-0.795002	0.153514
955.103	NaN	-0.90578	-0.194018	-1.06907	-0.0150932
958.902	NaN	-0.80835	0.879875	-1.06907	1.01051
963.262	-0.120944	-0.343945	0.673713	-0.520246	0.824032
965.302	NaN	-0.550518	0.587276	-0.771615	0.670729
966.702	NaN	0.0725165	0.602348	-0.0199031	0.670729
966.952	0.430667	0.276442	0.569251	0.117974	0.708889
970.203	NaN	0.171342	0.773406	0.0540437	0.963502
970.453	0.439772	0.280638	0.583774	0.107777	0.72263
971.103	NaN	0.0208042	0.736745	-0.123865	0.952251
974.403	NaN	0.018654	0.552099	-0.123865	0.5921
974.643	0.116359	-0.278012	0.303161	-0.488808	0.449484
977.702	NaN	-0.584333	0.32464	-0.67609	0.5199
977.902	NaN	-0.0830933	0.494262	-0.360049	0.573111
978.153	0.211736	0.0986828	0.319246	-0.0167894	0.435475
981.642	0.235968	-0.0750809	0.478681	-0.283292	0.621334
984.602	NaN	-0.39959	0.696813	-0.631874	0.851225
984.902	0.273817	0.126322	0.45826	0.00394304	0.608633
987.652	0.0661737	-0.07282	0.223159	-0.195991	0.371205
990.503	NaN	-0.252185	0.27034	-0.345399	0.40028
990.803	0.358841	0.0864528	0.520117	-0.123172	0.674451
994.002	0.408323	0.301966	0.518166	0.200588	0.643909
994.402	NaN	0.0211679	0.776142	-0.119404	0.90066
995.302	NaN	0.0414393	0.773834	-0.119404	0.90066
996.803	NaN	0.0234174	0.566712	-0.0794758	0.665621
999.593	0.433851	0.247112	1.26766	0.111522	1.49949
1003.59	1.11727	0.332621	1.34425	0.165837	1.532
1004.2	NaN	0.174563	1.56305	0.0619845	1.70006
1007.68	0.292352	0.153428	0.46015	0.0346556	0.599164
1011.29	0.216071	0.104117	0.330472	-0.00735303	0.433191
1014.72	0.146906	0.0328977	0.271766	-0.0755989	0.377408
1017.8	0.368746	0.110709	0.58455	-0.0371942	0.762697
1020.8	NaN	0.0258973	0.82389	-0.0758469	1.14331
1026.84	0.499108	0.241569	0.660345	0.0888967	0.784329
1029.87	0.445151	0.307276	0.596298	0.176888	0.743997
1032.92	0.671004	0.386918	0.832946	0.232056	0.946683
1035.95	1.3555	0.73781	1.51932	0.574923	1.63598
1039	1.04219	0.880552	1.44085	0.752975	1.6228
1042.04	1.01366	0.892151	1.13415	0.778534	1.24318
1045.08	0.754551	0.595771	1.04761	0.465574	1.20697
1048.13	0.420774	0.26369	0.684666	0.156195	0.84369
1053.88	0.379035	0.259512	0.496987	0.155197	0.626146
1056.92	0.246487	0.101625	0.418088	-0.0201833	0.575954
1059.26	0.187494	0.0702691	0.305429	-0.0362966	0.411338
1063.6	NaN	-0.555107	0.348533	-0.718369	0.487339
1066.81	NaN	-0.551465	0.356254	-0.718369	0.487339
1066.92	0.0198661	-0.123431	0.162191	-0.318442	0.297896
1070.19	0.0013107	-0.114196	0.1193	-0.22795	0.23081
1075.63	-0.0741339	-0.214439	0.0530045	-0.323683	0.198563
1078.91	0.0764968	-0.125208	0.221097	-0.290599	0.359574
1082.88	0.303167	0.102128	0.486759	-0.0499144	0.618611
1091.22	0.191173	0.0336362	0.419732	-0.0879155	0.576546
1095.46	0.352489	0.106157	0.509642	-0.0648178	0.646344
1099.21	0.102665	-0.157013	0.402504	-0.296743	0.580557
1103.6	NaN	-0.369802	0.500935	-0.478162	0.646397
1104.46	-0.0386083	-0.174014	0.0888248	-0.310795	0.194285
1106.98	0.0378114	-0.0814593	0.146948	-0.207327	0.26577
1110.01	0.385668	0.0512033	0.545494	-0.110122	0.692057
1113.34	0.648471	0.456591	0.794859	0.285534	0.912337
1116.6	0.56943	0.433208	0.730799	0.317505	0.857178
1120.51	0.945246	0.507451	1.10516	0.360989	1.22582
1124.89	0.587116	0.435209	1.03058	0.298739	1.20056
1129.88	0.441901	0.313231	0.564784	0.199411	0.70544
1134.57	0.252406	0.105056	0.427179	-0.0165756	0.581644
1138.31	-0.0542429	-0.208982	0.198954	-0.352684	0.354983
1143.01	NaN	-0.407701	0.135444	-0.446059	0.249127
1144.26	0.286773	-0.143206	0.517136	-0.328454	0.673401
1146.11	NaN	-0.123015	0.686038	-0.251113	0.879365
1148.31	NaN	-0.123053	0.378806	-0.238362	0.414892
1148.36	0.158492	0.0144847	0.318788	-0.126206	0.473391
1150.61	NaN	-0.29956	0.497449	-0.409938	0.619177
1152.57	0.527541	-0.0320103	0.691197	-0.20258	0.818485
1156.92	0.449729	0.284421	0.641033	0.111117	0.792382
1174.45	0.460605	0.319716	0.637455	0.197699	0.798027
1178.46	0.358808	0.200232	0.497779	0.0392747	0.635772
1181	NaN	0.038924	0.665778	-0.23198	0.818048
1182.64	0.580675	0.365156	0.791378	0.209946	0.972443
1184.1	NaN	0.166122	0.981423	0.105211	1.1454
1185.36	0.708915	0.429524	0.872383	0.27356	0.994115
1188.59	0.939183	0.74984	1.139	0.599878	1.33346
1191.7	NaN	0.551316	1.40643	0.359457	1.51388
1192.6	NaN	0.565792	1.43531	0.448787	1.51827
1193	NaN	0.368579	1.39607	0.176332	1.51827
1196.4	NaN	0.312375	1.03442	0.191126	1.34956
1198.3	NaN	0.253471	0.882344	0.234829	0.939506
1198.35	0.706977	0.530938	0.913868	0.393661	1.08036
1199.7	NaN	-0.591625	1.08781	-0.764913	1.2568
1201.2	NaN	-0.547632	0.555996	-0.764913	0.645242
1202.6	NaN	-0.188566	0.581114	-0.351713	0.645242
1203	NaN	-0.163144	0.565097	-0.24136	0.645242
1204.9	NaN	0.0930315	0.862932	-0.072173	0.992639
1206.2	NaN	-0.232045	0.79871	-0.357921	0.992639
1208.09	0.277656	-0.0310437	0.605608	-0.150543	0.735744
1208.1	NaN	-0.532291	0.85759	-0.720152	1.0971
1211.1	NaN	-0.577978	0.844585	-0.720152	0.977292
1211.7	NaN	-0.588105	0.152689	-0.738024	0.222454
1213.7	NaN	-0.551845	0.921676	-0.657332	1.04471
1216.8	NaN	0.475904	0.880825	0.473149	0.886397
1216.81	0.543667	0.35177	0.710282	0.159324	0.850409
1219.5	NaN	-0.156873	0.755452	-0.386057	0.866234
1221.91	NaN	-0.224691	0.491143	-0.350977	0.781408
1227.49	-0.0358919	-0.168813	0.0874295	-0.289425	0.216974
1231.41	0.0112314	-0.189988	0.237476	-0.361681	0.379984
1235.61	-0.0139901	-0.225244	0.219207	-0.403354	0.365182
1237.2	NaN	-0.434517	0.203988	-0.610452	0.404393
1239.23	0.107559	-0.137432	0.270611	-0.312948	0.401184
1242.37	0.454581	0.184715	0.618685	0.006474	0.735713
1245.39	0.535082	0.407911	0.631075	0.325827	0.774199
1245.4	NaN	0.299779	1.26515	0.146505	1.52863
1247.7	NaN	0.301789	1.22777	0.146505	1.52863
1247.98	0.590167	0.448354	0.775209	0.313097	0.975244
1248	NaN	-0.403663	1.00161	-0.700357	1.15673
1250	NaN	-0.0679186	0.939355	-0.298322	0.951535
1250.6	NaN	-0.633816	0.131195	-0.878398	0.223264
1251.1	NaN	-0.50351	1.44237	-0.878398	1.68829
1252.2	NaN	0.661845	1.39935	0.543832	1.57815
1252.24	1.03846	0.876674	1.22263	0.745609	1.39548
1252.4	NaN	0.463834	1.43163	0.337336	1.68829
1253.5	NaN	0.457426	1.106	0.332185	1.21442
1254.35	0.740368	0.605853	0.849385	0.491783	0.946838
1254.4	NaN	0.448699	0.974233	0.332185	0.998668
1255.1	NaN	-0.170912	0.862113	-0.48664	1.03
1256	NaN	-0.176047	0.838665	-0.317398	0.97693
1256.03	0.714738	0.320913	0.947428	-0.0424386	1.14532
1257	NaN	0.0901901	1.16102	-0.0117046	1.26263
1258	NaN	0.0666973	0.596579	-0.0117046	0.691023
1258.04	0.279977	0.1547	0.401632	0.031735	0.52157
1259.6	0.551478	0.303319	0.780624	0.111052	0.932988
1266.34	0.684564	0.471066	0.828888	0.319668	0.964942
1268.47	0.729313	0.613588	0.844004	0.506121	0.965253
1270.54	0.565957	-0.214552	1.51727	-0.452678	1.75404
1274.84	1.26344	0.45542	1.6193	0.321653	1.79732
1274.9	NaN	-0.55993	1.84369	-0.806161	1.92267
1275.6	NaN	-0.508777	0.852975	-0.806161	1.1051
1280.3	NaN	0.167031	0.801295	0.088556	0.978037
1280.32	0.475426	0.35293	0.605191	0.242104	0.737144
1283.75	1.36438	0.468562	1.59387	0.313664	1.76312
1291.5	NaN	0.0385018	1.73445	-0.145559	1.9974
1300.6	NaN	0.0186248	0.682767	-0.0340086	0.878268
1300.62	0.553072	0.261846	0.811588	0.101804	1.02424
1303.3	NaN	0.309644	1.09441	0.259146	1.17451
1308.4	NaN	-0.511752	1.67311	-0.685913	1.85313
1328.6	NaN	-0.603585	0.482949	-0.685913	0.698915
1331.2	NaN	-0.544845	0.533629	-0.685913	0.61022
1334.3	NaN	-0.0104936	0.541506	-0.143815	0.61022
1334.69	0.256377	0.143057	0.415061	0.0689039	0.503857
1334.7	NaN	0.0603098	1.75661	-0.143815	1.85313
1337.1	NaN	-0.0240826	1.63895	-0.229602	1.85313
1344.8	NaN	-0.0418075	1.43681	-0.229602	1.68673
1345.2	NaN	-0.0857844	0.894055	-0.119816	1.08464
1345.23	0.221615	-0.0409973	0.521788	-0.194992	0.738445
1349.17	-0.0412115	-0.143052	0.0654328	-0.26604	0.181674
1349.2	NaN	-0.243044	0.732176	-0.405583	0.984994
1350.5	NaN	-0.330807	0.80666	-0.495469	0.984994
1352.1	NaN	-0.412845	0.795507	-0.495469	0.859419
1352.13	0.444933	-0.0568223	0.662782	-0.268279	0.825412
1353.5	NaN	-0.462582	0.858562	-0.569242	0.984524
1355.54	0.0732618	-0.200509	0.234132	-0.355371	0.36896
1358.74	0.788987	0.149885	0.948006	-0.0104494	1.09761
1361.77	0.711058	0.554814	0.884862	0.435243	1.02948
1364.69	0.605839	0.489278	0.721407	0.384322	0.839795
1367.56	0.518673	0.391324	0.638294	0.271559	0.751309
1370.42	0.548774	0.427115	0.665265	0.297687	0.802872
1373.38	0.537701	0.41574	0.659501	0.307802	0.78551
1375.99	0.476201	0.331925	0.60863	0.156514	0.736791
1379.48	0.44689	0.277293	0.588617	0.109934	0.741779
1381.1	NaN	-0.05883	0.717147	-0.146928	0.86799
1382.9	NaN	-0.060041	0.508335	-0.0905592	0.581313
1382.95	0.52223	0.19013	0.75378	0.0318901	0.92276
1384.5	NaN	-0.129042	0.970917	-0.207225	1.12732
1386.9	NaN	-0.160349	0.392922	-0.180981	0.504169
1386.92	1.10803	0.116408	1.32387	-0.0471924	1.51393
1388.5	NaN	-0.592005	1.53726	-0.719639	1.65945
1391.2	NaN	-0.551006	0.783433	-0.718151	0.992663
1393	NaN	0.028939	0.722367	-0.159415	0.93284
1395.9	NaN	0.000280081	0.525732	-0.0445671	0.58162
1395.93	0.265444	0.0536405	0.436938	-0.0972105	0.571347
1408.96	0.311876	0.0752979	0.469348	-0.0727257	0.588328
1413.36	0.313965	0.192986	0.440073	0.0623729	0.556172
1417.47	0.48791	0.274186	0.635012	0.109384	0.772254
1421.49	0.352991	0.20029	0.57377	0.0793487	0.723095
1427.03	0.0884947	-0.0613895	0.292148	-0.175559	0.448819
1432.35	0.241316	0.0113359	0.395359	-0.15033	0.514397
1438.04	0.264147	0.154987	0.387362	0.0295594	0.503666
1443.6	0.515494	0.236165	0.671015	0.085888	0.790172
1448.1	0.779273	0.582427	0.941064	0.428469	1.06739
1452.1	0.856527	0.731789	0.96143	0.617168	1.07221
1455.2	NaN	0.399231	0.963626	0.239865	1.05742
1457.84	0.588133	0.419726	0.741815	0.247428	0.895805
1460.5	NaN	0.134405	0.895623	0.0136301	0.987624
1461.3	NaN	-0.63398	0.127425	-0.755972	0.207779
1462.1	NaN	-0.525766	0.793245	-0.755972	0.855326
1463.79	0.355654	0.154099	0.555509	-0.0416926	0.695806
1465.3	NaN	-0.0772461	0.601679	-0.212527	0.703034
1466.7	0.26306	0.152705	0.387106	0.0364313	0.509978
1472.67	0.35787	0.214703	0.48939	0.104731	0.61988
1475.82	0.334689	0.214855	0.461578	0.0813967	0.581838
1479.47	0.411685	0.268789	0.545351	0.145545	0.6581
1483.41	0.397321	0.276925	0.521291	0.155129	0.644786
1487.47	0.802093	0.461533	1.25448	0.241538	1.40145
1495.47	1.14588	0.714289	1.29947	0.568719	1.43245
1498.88	0.916637	0.757658	1.23035	0.644606	1.39232
1502.34	0.409772	0.256529	0.840251	0.131275	1.02145
1505.5	0.685206	0.32873	0.853238	0.191496	0.971857
1508.71	0.773552	0.655703	0.88647	0.539037	0.993163
1512.66	0.72721	0.606032	0.849582	0.486862	0.967906
1517.1	0.566099	0.42512	0.729836	0.286909	0.875249
1521.75	1.10207	0.50988	1.26558	0.340832	1.39523
1525.93	0.380128	-0.155156	1.02528	-0.339629	1.28472
1548.25	0.237644	-0.210284	0.788324	-0.364882	1.02723
1554.04	-0.105541	-0.263066	0.323335	-0.38771	0.466477
1556.12	0.223231	-0.191785	0.38634	-0.350597	0.511951
1559.55	0.388986	0.260966	0.511135	0.149393	0.620473
1567.99	0.415311	0.290745	0.532575	0.182942	0.636349
1570.55	0.870218	0.43075	1.03108	0.26083	1.15308
1573.12	0.544516	0.390319	0.954768	0.257799	1.10652
1575.27	0.975738	0.460337	1.12708	0.29524	1.24503
1579.92	0.639944	0.478104	1.05291	0.362449	1.2121
1585.13	0.496111	0.367184	0.627964	0.239305	0.744097
1587.92	0.313851	-0.0361674	0.50416	-0.18353	0.629221
1597.47	0.0691134	-0.0878353	0.425825	-0.211972	0.552566
1601	0.0646615	-0.0531619	0.19088	-0.177901	0.303464
1604.54	0.521763	0.146559	0.685807	-0.037704	0.818129
1611.63	0.538868	0.412178	0.664448	0.301103	0.799859
1615.17	0.290705	0.13972	0.518856	0.0257089	0.658132
1618.72	0.404422	0.213615	0.552797	0.0621389	0.676382
1622.25	0.346884	0.200801	0.500003	0.0829996	0.641198
1625.81	0.0872642	-0.0711434	0.292212	-0.204631	0.470512
1629.52	0.322688	0.0114294	0.481928	-0.145458	0.622417
1633.67	0.508789	0.365359	0.641	0.238625	0.763088
1637.97	0.510385	0.380391	0.626949	0.268571	0.749486
1641.97	0.695558	0.470771	0.849255	0.303407	0.962457
1645.47	1.42336	0.76902	1.57854	0.599734	1.71094
1648.91	0.790049	0.623758	1.50888	0.502624	1.66469
1651.98	0.946304	0.704021	1.10177	0.553644	1.23622
1655.06	0.948461	0.825397	1.07174	0.705584	1.21306
1658.26	0.932976	0.806522	1.05209	0.691985	1.16335
1661.68	0.643672	0.481402	0.948434	0.351056	1.1025
1665.17	0.533651	0.406548	0.652151	0.296761	0.774369
1668.54	0.385509	0.250518	0.543037	0.120152	0.684133
1671.18	0.342587	0.223379	0.467718	0.108205	0.573337
1674.69	0.336934	0.218684	0.462321	0.109562	0.565663
1677.83	0.548615	0.315198	0.695068	0.162667	0.819543
1680.97	0.688727	0.552834	0.818946	0.436892	0.947554
1684.6	0.788196	0.658501	0.907006	0.533784	1.02763
1688.89	0.936121	0.783725	1.0749	0.624655	1.19474
1693.64	0.491292	0.330736	0.988966	0.206337	1.16823
1699.49	0.395706	0.267325	0.517077	0.146389	0.627975
1708.2	0.0569413	-0.0985889	0.402778	-0.2282	0.563623
1717.51	-0.0988747	-0.22125	0.026779	-0.333931	0.156281
1726.46	0.475192	-0.145237	0.620805	-0.297027	0.759674
1735.33	0.457477	0.322149	0.588728	0.202826	0.698862
1744.1	0.194406	0.0183918	0.480122	-0.121491	0.643042
1754.36	0.116676	-0.00850809	0.234778	-0.132034	0.35121
1757.1	0.419423	0.141445	0.575204	-0.00721475	0.698333
1759.37	0.493145	0.384714	0.610381	0.270706	0.715816

## Sheet: d18Osw-stack
Age	d18Osw	sg1	sgn1	sg2	sgn2
338	0.70919	0.5174	0.90099	0.3256	1.0928
341	0.71968	0.50058	0.93879	0.28147	1.1579
344	0.80546	0.60349	1.0074	0.40151	1.2094
347	0.67098	0.41666	0.92531	0.16233	1.1796
350	0.6058	0.34522	0.86637	0.084648	1.1269
353	0.46623	0.27085	0.6616	0.075473	0.85698
356	0.59292	0.40938	0.77647	0.22583	0.96002
359	0.55893	0.22299	0.89487	-0.11295	1.2308
362	0.49228	0.13199	0.85256	-0.22829	1.2128
365	0.48288	0.036399	0.92936	-0.41008	1.3758
368	0.42562	0.10501	0.74624	-0.21561	1.0669
371	0.31101	0.18431	0.43771	0.05761	0.56441
374	0.22425	0.088402	0.36009	-0.047445	0.49594
377	0.091485	-0.12098	0.30395	-0.33344	0.51641
380	0.034027	-0.24208	0.31014	-0.51819	0.58625
383	0.077205	-0.24113	0.39554	-0.55947	0.71388
386	0.034987	-0.52981	0.59978	-1.0946	1.1646
389	0.019161	-0.48798	0.5263	-0.99512	1.0334
392	-0.05057	-0.47153	0.37039	-0.8925	0.79136
395	-0.25477	-0.56548	0.055947	-0.87619	0.36666
398	-0.41105	-0.70067	-0.12143	-0.9903	0.1682
401	-0.47656	-0.72461	-0.22852	-0.97265	0.019526
404	-0.33627	-0.54463	-0.1279	-0.753	0.080464
407	-0.11875	-0.43402	0.19652	-0.7493	0.51179
410	0.080132	-0.3076	0.46787	-0.69534	0.8556
413	0.21347	-0.11738	0.54431	-0.44822	0.87515
416	0.3838	0.12849	0.63912	-0.12683	0.89444
419	0.31813	0.13428	0.50198	-0.049572	0.68583
422	0.75563	0.50049	1.0108	0.24534	1.2659
425	0.90702	0.731	1.083	0.55497	1.2591
428	0.98122	0.77701	1.1854	0.57281	1.3896
431	0.94669	0.77264	1.1208	0.59858	1.2948
434	0.91124	0.63096	1.1915	0.35068	1.4718
437	0.94758	0.76669	1.1285	0.58581	1.3094
440	0.7785	0.55838	0.99863	0.33825	1.2188
443	0.89348	0.71071	1.0763	0.52793	1.259
446	0.77861	0.5901	0.96711	0.4016	1.1556
449	0.77073	0.60428	0.93719	0.43783	1.1036
452	0.62951	0.46465	0.79437	0.29978	0.95923
455	0.70536	0.51371	0.89702	0.32205	1.0887
458	0.71767	0.56613	0.86921	0.41459	1.0208
461	0.61246	0.36208	0.86285	0.11169	1.1132
464	0.56858	0.3418	0.79536	0.11503	1.0221
467	0.51057	0.32055	0.70059	0.13053	0.89061
470	0.655	0.42987	0.88014	0.20473	1.1053
473	0.42415	0.17535	0.67294	-0.073441	0.92174
476	0.25636	0.091557	0.42116	-0.073243	0.58596
479	0.25389	0.045708	0.46208	-0.16248	0.67027
482	0.11588	-0.1435	0.37526	-0.40288	0.63464
485	-0.058347	-0.32625	0.20956	-0.59415	0.47746
488	-0.074507	-0.36566	0.21664	-0.65681	0.5078
491	-0.19305	-0.40312	0.017014	-0.61318	0.22708
494	-0.18979	-0.45333	0.073749	-0.71687	0.33729
497	-0.27206	-0.49561	-0.048498	-0.71917	0.17506
500	-0.028923	-0.26312	0.20527	-0.49731	0.43946
503	-0.092663	-0.29069	0.10537	-0.48872	0.3034
506	-0.043385	-0.38275	0.29598	-0.72212	0.63535
509	0.22359	-0.11415	0.56133	-0.45188	0.89906
512	0.32117	0.012275	0.63006	-0.29662	0.93895
515	0.39176	0.038604	0.74491	-0.31455	1.0981
518	0.29486	-0.11963	0.70934	-0.53411	1.1238
521	0.28363	-0.18941	0.75666	-0.66245	1.2297
524	0.36038	-0.24509	0.96586	-0.85057	1.5713
527	0.33733	0.12492	0.54974	-0.087484	0.76215
530	0.40714	0.16226	0.65202	-0.082617	0.8969
533	0.44649	0.19437	0.69861	-0.057755	0.95073
536	0.5621	0.37348	0.75071	0.18486	0.93933
539	0.71906	0.34505	1.0931	-0.028958	1.4671
542	0.6246	0.39177	0.85744	0.15893	1.0903
545	0.53521	0.28885	0.78157	0.042483	1.0279
548	0.6256	0.4516	0.7996	0.2776	0.97361
551	0.55956	0.30293	0.81618	0.046307	1.0728
554	0.49237	0.24467	0.74007	-0.0030351	0.98777
557	0.31116	0.11106	0.51125	-0.089038	0.71135
560	0.22391	0.044858	0.40296	-0.13419	0.582
563	0.082814	-0.097922	0.26355	-0.27866	0.44428
566	-0.064155	-0.26566	0.13734	-0.46716	0.33884
569	0.070634	-0.14689	0.28816	-0.36441	0.50568
572	0.01411	-0.17493	0.20315	-0.36397	0.39219
575	0.12077	-0.044245	0.28578	-0.20925	0.45079
578	0.14073	-0.12624	0.4077	-0.3932	0.67467
581	0.26091	-0.057072	0.57889	-0.37505	0.89687
584	0.42938	0.20985	0.64891	-0.0096876	0.86845
587	0.31637	0.14718	0.48556	-0.022011	0.65475
590	0.27117	-0.16397	0.7063	-0.5991	1.1414
593	0.28096	-0.16249	0.72441	-0.60594	1.1679
596	0.23826	-0.16746	0.64398	-0.57318	1.0497
599	0.39834	0.044245	0.75244	-0.30985	1.1065
602	0.37254	0.11178	0.63329	-0.14897	0.89405
605	0.14607	-0.035198	0.32734	-0.21647	0.50861
608	0.30977	-0.078892	0.69843	-0.46755	1.0871
611	0.020292	-0.18106	0.22164	-0.38241	0.42299
614	0.13689	-0.043961	0.31774	-0.22481	0.49859
617	0.5659	0.080851	1.0509	-0.4042	1.536
620	1.0519	0.63109	1.4728	0.21026	1.8936
623	1.0453	0.64662	1.444	0.24796	1.8426
626	1.1202	0.93187	1.3086	0.74353	1.4969
629	1.0704	0.8842	1.2565	0.69804	1.4427
632	1.0875	0.83873	1.3362	0.58998	1.585
635	1.2457	0.83768	1.6537	0.42968	2.0617
638	1.048	0.83958	1.2565	0.63114	1.4649
641	0.91741	0.70558	1.1292	0.49374	1.3411
644	0.70092	0.55383	0.84801	0.40674	0.9951
647	0.93346	0.73984	1.1271	0.54621	1.3207
650	0.76002	0.57433	0.94571	0.38863	1.1314
653	0.68469	0.51304	0.85634	0.34139	1.028
656	0.75083	0.59338	0.90828	0.43593	1.0657
659	0.40341	0.22647	0.58036	0.049522	0.7573
662	0.44682	0.17017	0.72346	-0.10647	1.0001
665	0.39511	0.19021	0.60001	-0.014694	0.80491
668	0.36695	0.17115	0.56275	-0.024649	0.75855
671	0.45035	0.21433	0.68637	-0.021691	0.92239
674	0.49654	0.21528	0.7778	-0.065976	1.0591
677	0.37539	0.16075	0.59003	-0.053885	0.80466
680	0.27418	0.09391	0.45446	-0.086364	0.63473
683	0.14867	-0.0016513	0.29899	-0.15197	0.44931
686	-0.052905	-0.28949	0.18368	-0.52608	0.42027
689	-0.063483	-0.24472	0.11775	-0.42596	0.29899
692	-0.14674	-0.27678	-0.01669	-0.40682	0.11335
695	-0.067244	-0.47627	0.34178	-0.88529	0.7508
698	-0.088526	-0.31328	0.13623	-0.53803	0.36098
701	0.21617	-0.29156	0.7239	-0.79929	1.2316
704	0.28469	0.014608	0.55476	-0.25547	0.82484
707	0.35351	0.14141	0.56562	-0.0707	0.77773
710	0.53633	0.1222	0.95045	-0.29192	1.3646
713	0.49939	0.26598	0.7328	0.032568	0.96621
716	0.60134	0.26586	0.93683	-0.069618	1.2723
719	0.71032	0.52141	0.89923	0.3325	1.0881
722	0.81585	0.51844	1.1133	0.22103	1.4107
725	0.86855	0.44502	1.2921	0.021482	1.7156
728	0.5131	0.27948	0.74671	0.045865	0.98033
731	0.60387	0.40544	0.80231	0.207	1.0007
734	0.46088	0.26323	0.65854	0.065572	0.8562
737	0.4265	0.21687	0.63613	0.0072371	0.84576
740	0.53611	0.29178	0.78044	0.047451	1.0248
743	0.56894	0.1713	0.96658	-0.22634	1.3642
746	0.60644	0.33681	0.87607	0.067173	1.1457
749	0.7593	0.29873	1.2199	-0.16184	1.6804
752	0.4626	0.11512	0.81008	-0.23235	1.1576
755	0.47986	0.21852	0.7412	-0.042823	1.0025
758	0.56326	0.25242	0.8741	-0.058413	1.1849
761	0.39351	0.096054	0.69097	-0.20141	0.98843
764	0.19911	-0.44618	0.8444	-1.0915	1.4897
767	0.13511	-0.45579	0.72601	-1.0467	1.3169
770	0.055823	-0.22339	0.33504	-0.50261	0.61425
773	-0.037679	-0.39049	0.31514	-0.74331	0.66795
776	0.10715	-0.21177	0.42607	-0.53069	0.74499
779	0.2376	0.040078	0.43513	-0.15745	0.63265
782	0.35283	0.19109	0.51457	0.029341	0.67632
785	0.27368	0.0080932	0.53927	-0.2575	0.80486
788	0.32716	0.13362	0.5207	-0.059923	0.71424
791	0.66974	0.24237	1.0971	-0.18499	1.5245
794	0.75244	0.32634	1.1785	-0.099766	1.6046
797	0.73351	0.40396	1.0631	0.0744	1.3926
800	0.67296	0.47538	0.87055	0.27779	1.0681
803	0.60878	0.45146	0.76611	0.29414	0.92343
806	0.27472	0.032784	0.51665	-0.20915	0.75859
809	0.415	0.025925	0.80408	-0.36315	1.1932
812	0.5697	0.067246	1.0721	-0.4352	1.5746
815	0.42125	-0.14272	0.98522	-0.70669	1.5492
818	0.24753	-0.057878	0.55294	-0.36329	0.85835
821	0.066101	-0.22942	0.36162	-0.52494	0.65714
824	-0.01038	-0.16313	0.14237	-0.31589	0.29513
827	0.099943	-0.16166	0.36155	-0.42327	0.62315
830	0.042891	-0.25087	0.33665	-0.54463	0.63041
833	0.098182	-0.23879	0.43515	-0.57576	0.77213
836	-3.7275e-05	-0.25568	0.2556	-0.51132	0.51124
839	0.042123	-0.18867	0.27292	-0.41946	0.50371
842	0.17167	-0.026406	0.36975	-0.22448	0.56783
845	0.23596	0.034695	0.43723	-0.16657	0.6385
848	0.027771	-0.37696	0.43251	-0.7817	0.83724
851	-0.13479	-0.33397	0.064392	-0.53315	0.26357
854	-0.061426	-0.23428	0.11143	-0.40714	0.28429
857	0.13019	-0.23494	0.49533	-0.60008	0.86046
860	0.3293	-0.20526	0.86386	-0.73983	1.3984
863	0.49392	0.043628	0.94421	-0.40666	1.3945
866	0.55455	0.17396	0.93515	-0.20664	1.3158
869	0.69561	0.46903	0.9222	0.24245	1.1488
872	0.89402	0.73275	1.0553	0.57148	1.2166
875	0.89031	0.5964	1.1842	0.30249	1.4781
878	0.87354	0.58833	1.1587	0.30312	1.444
881	1.0961	0.7265	1.4657	0.35688	1.8353
884	0.86226	0.45772	1.2668	0.053189	1.6713
887	0.82039	0.39075	1.25	-0.038887	1.6797
890	1.0248	0.70582	1.3439	0.3868	1.6629
893	0.73079	0.48446	0.97713	0.23812	1.2235
896	0.86312	0.62708	1.0992	0.39105	1.3352
899	0.61499	0.37235	0.85764	0.12971	1.1003
902	0.44097	0.2747	0.60723	0.10844	0.77349
905	0.28812	0.052206	0.52404	-0.18371	0.75996
908	0.35881	0.1779	0.53972	-0.0030057	0.72063
911	0.33758	0.21636	0.45879	0.095149	0.58001
914	0.44969	0.23746	0.66191	0.025235	0.87414
917	0.65762	0.38029	0.93496	0.10296	1.2123
920	0.54934	-0.1057	1.2044	-0.76074	1.8594
923	0.11366	-0.28479	0.51211	-0.68324	0.91056
926	0.0037081	-0.32599	0.3334	-0.65568	0.6631
929	-0.0095445	-0.19087	0.17178	-0.3722	0.35311
932	-0.051732	-0.24871	0.14525	-0.44569	0.34223
935	-0.084069	-0.30599	0.13786	-0.52792	0.35978
938	-0.2116	-0.46509	0.041898	-0.71859	0.29539
941	-0.14738	-0.43977	0.14501	-0.73217	0.4374
944	-0.182	-0.43684	0.072838	-0.69168	0.32768
947	-0.33744	-0.53731	-0.13757	-0.73718	0.062298
950	-0.43856	-0.71071	-0.16641	-0.98286	0.10574
953	-0.46935	-0.65717	-0.28154	-0.84499	-0.093719
956	-0.24854	-0.59729	0.10022	-0.94605	0.44897
959	-0.016055	-0.45715	0.42504	-0.89825	0.86614
962	0.038383	-0.15956	0.23633	-0.3575	0.43427
965	0.22531	-0.14316	0.59377	-0.51162	0.96224
968	0.30284	0.11531	0.49037	-0.072222	0.6779
971	0.17218	-0.096373	0.44072	-0.36492	0.70927
974	-0.012709	-0.16606	0.14064	-0.31941	0.29399
977	-0.089488	-0.4682	0.28923	-0.84692	0.66794
980	0.068814	-0.18925	0.32688	-0.44731	0.58494
983	0.048803	-0.24718	0.34478	-0.54316	0.64077
986	0.056353	-0.16496	0.27766	-0.38627	0.49897
989	-0.043236	-0.3905	0.30403	-0.73776	0.65129
992	0.045096	-0.25701	0.3472	-0.55911	0.6493
995	0.066455	-0.18509	0.318	-0.43663	0.56954
998	0.085428	-0.16466	0.33552	-0.41475	0.58561
1001	0.22703	-0.047555	0.50162	-0.32214	0.7762
1004	0.27002	-0.17366	0.71369	-0.61733	1.1574
1007	0.14375	-0.093965	0.38147	-0.33168	0.61919
1010	-0.014972	-0.21408	0.18414	-0.41319	0.38325
1013	-0.079906	-0.22221	0.062399	-0.36452	0.2047
1016	-0.098009	-0.26548	0.069457	-0.43294	0.23692
1019	-0.054092	-0.46656	0.35837	-0.87902	0.77084
1022	-0.074689	-0.55987	0.41049	-1.045	0.89567
1025	0.11234	-0.10144	0.32611	-0.31521	0.53988
1028	0.14099	-0.046716	0.32869	-0.23442	0.51639
1031	0.22985	-0.043224	0.50292	-0.31629	0.77599
1034	0.52171	0.21343	0.82998	-0.09484	1.1383
1037	0.67061	0.36617	0.97506	0.06172	1.2795
1040	0.60611	0.36201	0.85021	0.11792	1.0943
1043	0.58278	0.44102	0.72453	0.29926	0.86629
1046	0.44732	0.27561	0.61904	0.10389	0.79075
1049	0.3471	0.12431	0.56989	-0.098486	0.79268
1052	0.26888	-0.032068	0.56984	-0.33302	0.87079
1055	0.14191	-0.21106	0.49487	-0.56403	0.84784
1058	0.026429	-0.3357	0.38856	-0.69783	0.75069
1061	-0.073641	-0.47667	0.32939	-0.8797	0.73242
1064	-0.10915	-0.56534	0.34704	-1.0215	0.80323
1067	-0.24763	-0.51848	0.023209	-0.78932	0.29405
1070	-0.25414	-0.52103	0.012756	-0.78793	0.27965
1073	-0.30936	-0.46156	-0.15715	-0.61377	-0.0049408
1076	-0.28545	-0.47813	-0.092773	-0.6708	0.099903
1079	-0.21932	-0.33722	-0.10141	-0.45512	0.016486
1082	-0.012702	-0.21241	0.18701	-0.41212	0.38671
1085	0.041949	-0.16024	0.24414	-0.36242	0.44632
1088	0.21341	0.077502	0.34933	-0.05841	0.48524
1091	0.23796	0.029262	0.44665	-0.17943	0.65535
1094	0.052534	-0.13926	0.24433	-0.33106	0.43613
1097	0.23237	0.035779	0.42896	-0.16081	0.62555
1100	-0.033187	-0.25303	0.18666	-0.47288	0.4065
1103	0.002716	-0.23088	0.23631	-0.46448	0.46991
1106	-0.084012	-0.24328	0.075259	-0.40255	0.23453
1109	0.00044057	-0.15858	0.15946	-0.31759	0.31848
1112	0.17091	-0.01303	0.35485	-0.19697	0.5388
1115	0.26845	0.034314	0.50258	-0.19982	0.73672
1118	0.28152	0.088117	0.47492	-0.10528	0.66832
1121	0.35726	-0.10459	0.8191	-0.56643	1.2809
1124	0.30525	0.10294	0.50757	-0.099384	0.70989
1127	0.272	-0.031387	0.57539	-0.33478	0.87879
1130	0.24632	0.031243	0.46141	-0.18384	0.67649
1133	0.19103	-0.0051228	0.38718	-0.20128	0.58334
1136	0.35752	0.14428	0.57075	-0.068948	0.78398
1139	0.021989	-0.30044	0.34442	-0.62287	0.66685
1142	0.15504	-0.20787	0.51794	-0.57077	0.88084
1145	0.14698	-0.35092	0.64488	-0.84883	1.1428
1148	0.19611	-0.059493	0.45172	-0.3151	0.70733
1151	0.17157	-0.2116	0.55474	-0.59477	0.93791
1154	0.30208	0.0127	0.59147	-0.27668	0.88085
1157	0.33107	0.11416	0.54797	-0.10274	0.76488
1160	0.19143	-0.017209	0.40008	-0.22585	0.60872
1163	0.31028	0.10155	0.51901	-0.10719	0.72774
1166	0.20588	0.03957	0.37219	-0.12674	0.5385
1169	0.2588	0.096922	0.42068	-0.064955	0.58255
1172	0.36335	0.037132	0.68956	-0.28908	1.0158
1175	0.25472	-0.15553	0.66498	-0.56579	1.0752
1178	0.21996	-0.16472	0.60463	-0.54939	0.98931
1181	0.26213	-0.083532	0.60779	-0.42919	0.95345
1184	0.32691	0.034216	0.6196	-0.25848	0.9123
1187	0.40179	0.21437	0.5892	0.026949	0.77662
1190	0.54267	0.32139	0.76394	0.10011	0.98522
1193	0.60073	0.32934	0.87213	0.057938	1.1435
1196	0.57489	0.3066	0.84318	0.038303	1.1115
1199	0.5252	0.16126	0.88915	-0.20269	1.2531
1202	0.41371	-0.030359	0.85779	-0.47443	1.3019
1205	0.39036	0.094507	0.68622	-0.20135	0.98208
1208	0.28829	-0.041164	0.61773	-0.37061	0.94718
1211	0.18602	-0.39279	0.76483	-0.9716	1.3436
1214	0.10522	-0.49281	0.70324	-1.0908	1.3013
1217	0.08815	-0.27531	0.45161	-0.63877	0.81507
1220	-0.046013	-0.51554	0.42351	-0.98506	0.89303
1223	-0.16493	-0.49029	0.16043	-0.81566	0.48579
1226	-0.19657	-0.38416	-0.0089731	-0.57176	0.17862
1229	-0.037231	-0.29804	0.22358	-0.55885	0.48439
1232	-0.064468	-0.23893	0.11	-0.4134	0.28446
1235	-0.032509	-0.19664	0.13162	-0.36077	0.29576
1238	0.10443	-0.17667	0.38553	-0.45776	0.66662
1241	0.20814	0.0080883	0.4082	-0.19197	0.60825
1244	0.54918	0.33531	0.76306	0.12143	0.97693
1247	0.53854	0.30091	0.77617	0.063277	1.0138
1250	0.52466	0.10704	0.94227	-0.31057	1.3599
1253	0.5859	0.3016	0.87021	0.017286	1.1545
1256	0.4476	0.013247	0.88196	-0.42111	1.3163
1259	0.25869	0.052966	0.46442	-0.15276	0.67015
1262	0.23823	-0.030471	0.50693	-0.29917	0.77563
1265	0.28867	-0.022585	0.59992	-0.33384	0.91118
1268	0.2098	-0.076533	0.49612	-0.36286	0.78245
1271	0.18596	-0.36948	0.74141	-0.92492	1.2969
1274	0.35241	-0.2096	0.91441	-0.7716	1.4764
1277	0.23909	-0.52375	1.0019	-1.2866	1.7648
1280	0.11337	-0.21889	0.44563	-0.55115	0.77789
1283	0.50363	0.10103	0.90623	-0.30157	1.3088
1286	0.70958	0.18722	1.2319	-0.33513	1.7543
1289	0.54587	0.078223	1.0135	-0.38942	1.4812
1292	0.45594	0.023928	0.88795	-0.40808	1.32
1295	0.30755	-0.081559	0.69666	-0.47067	1.0858
1298	0.19161	-0.12866	0.51189	-0.44893	0.83216
1301	0.12364	-0.083457	0.33074	-0.29055	0.53783
1304	0.00012788	-0.19206	0.19232	-0.38425	0.38451
1307	0.07818	-0.38517	0.54153	-0.84852	1.0049
1310	-0.011588	-0.44798	0.4248	-0.88436	0.86119
1313	-0.0076879	-0.43618	0.42081	-0.86467	0.8493
1316	0.0054885	-0.43604	0.44702	-0.87758	0.88855
1319	0.019825	-0.38552	0.42517	-0.79086	0.83051
1322	0.080273	-0.34694	0.50748	-0.77414	0.93469
1325	0.11418	-0.29123	0.51959	-0.69664	0.92501
1328	-0.0063133	-0.41177	0.39914	-0.81723	0.8046
1331	0.12315	-0.34187	0.58817	-0.80689	1.0532
1334	0.13789	-0.10477	0.38054	-0.34742	0.62319
1337	-0.037361	-0.2918	0.21708	-0.54625	0.47152
1340	-0.015624	-0.33078	0.29953	-0.64593	0.61468
1343	0.063254	-0.14551	0.27202	-0.35428	0.48079
1346	-0.024529	-0.22076	0.17171	-0.417	0.36794
1349	-0.16045	-0.3658	0.044897	-0.57116	0.25025
1352	-0.017191	-0.76939	0.73501	-1.5216	1.4872
1355	-0.16136	-0.51026	0.18753	-0.85915	0.53642
1358	0.0061688	-0.32908	0.34142	-0.66434	0.67668
1361	0.13455	-0.060638	0.32973	-0.25583	0.52492
1364	0.12756	-0.02373	0.27886	-0.17502	0.43015
1367	0.22117	-0.04084	0.48319	-0.30285	0.7452
1370	0.20645	0.0034341	0.40947	-0.19958	0.61249
1373	0.11345	-0.061171	0.28808	-0.2358	0.4627
1376	-0.0066262	-0.17401	0.16076	-0.34139	0.32814
1379	0.0052061	-0.19145	0.20186	-0.38811	0.39852
1382	0.08028	-0.20893	0.36949	-0.49814	0.6587
1385	0.13284	-0.32073	0.58641	-0.7743	1.04
1388	0.15887	-0.48358	0.80131	-1.126	1.4438
1391	0.0032494	-0.61801	0.62451	-1.2393	1.2458
1394	-0.16157	-0.46786	0.14473	-0.77416	0.45102
1397	-0.18278	-0.38311	0.017558	-0.58345	0.21789
1400	-0.14919	-0.37401	0.075622	-0.59882	0.30044
1403	-0.088475	-0.33059	0.15364	-0.5727	0.39575
1406	0.030737	-0.21381	0.27528	-0.45836	0.51983
1409	0.14168	-0.13085	0.4142	-0.40337	0.68672
1412	0.18966	-0.02154	0.40086	-0.23274	0.61206
1415	0.11773	-0.020347	0.25581	-0.15842	0.39388
1418	0.084964	-0.10808	0.27801	-0.30112	0.47105
1421	0.15827	-0.013355	0.32989	-0.18498	0.50152
1424	0.058665	-0.098853	0.21618	-0.25637	0.3737
1427	-0.058367	-0.22905	0.11232	-0.39974	0.283
1430	-0.015191	-0.22103	0.19065	-0.42687	0.39649
1433	0.065162	-0.21659	0.34692	-0.49835	0.62867
1436	0.074664	-0.20118	0.35051	-0.47702	0.62635
1439	-0.077132	-0.3475	0.19323	-0.61786	0.4636
1442	-0.017072	-0.28598	0.25183	-0.55488	0.52074
1445	0.054791	-0.29328	0.40287	-0.64136	0.75094
1448	0.15417	-0.066203	0.37455	-0.28658	0.59493
